# Supplementary material for: An automated approach for developing geohazard inventories using news: integrating natural language processing (NLP), machine learning, and mapping
Source: Copernicus journal article supplement (doi:10.5194/nhess-25-2421-2025), 2025-07-21
Supplement: Supplementary file 1 [file nhess-25-2421-2025-supplement.zip]

## Sheet: Sheet1
title	publish_date	text	top_img	url	meta_url	meta_img	meta_published_date	meta_description	meta_keywords	date	keyword
Çorum’da kumaş yüklü TIR alevlere teslim oldu		D100 kara yolu Pelitçik köyü yakınlarında, Zeki D. yönetimindeki tırda henüz bilinmeyen bir nedenle yangın çıktı. Durumu fark eden sürücü, tırı hemen yol kenarına park ederek 112 Acil Çağrı Merkezi'ne haber verdi. Olay yerine kısa sürede polis ve itfaiye ekipleri sevk edildi. Kargı ve Osmancık belediyelerine bağlı itfaiye ekipleri yangına müdahale ederek alevleri kontrol altına aldı. Ancak yangın…	https://iasbh.tmgrup.com.tr/01121b/1200/675/0/54/1600/956?u=https://isbh.tmgrup.com.tr/sbh/2024/12/23/corumda-kumas-yuklu-tir-alevlere-teslim-oldu-1734935828592.jpg	https://www.sabah.com.tr/yasam/corumda-kumas-yuklu-tir-alevlere-teslim-oldu-7203967	https://www.sabah.com.tr/yasam/corumda-kumas-yuklu-tir-alevlere-teslim-oldu-7203967	https://iasbh.tmgrup.com.tr/01121b/1200/675/0/54/1600/956?u=https://isbh.tmgrup.com.tr/sbh/2024/12/23/corumda-kumas-yuklu-tir-alevlere-teslim-oldu-1734935828592.jpg	2024-12-23T09:37:08+03:00	Çorum’un Kargı ilçesinde seyir halindeyken çıkan yangın sonucu kumaş yüklü bir TIR kullanılamaz hale geldi. D100 kara yolu Pelitçik köyü yakınlarında, Zeki D. yönetimindeki tırda henüz bilinmeyen bir nedenle yangın çıktı. Durumu fark eden sürücü, tırı hemen yol kenarına park ederek 112 Acil Çağrı...	['Çorum']	23.12.2024	yangın
Burdur’da halk otobüsü yangınında kundaklama şüphesi		Yangın gece saat 03.18'de Burdur merkez Aydınlıkevler Mahallesi Mahrukatcılar Sitesi Terakki Sokak üzerinde bulunan Özel Halk Otobüsleri Kooperatifi otopark alanında meydana geldi. Edinilen bilgilere göre otoparkta park halinde bulunan bir halk otobüsünde henüz bilinmeyen bir nedenle yangın çıktı. Hızla büyüyen yangın yan yana duran park halindeki diğer otobüslere de sıçradı 112 Acil Çağrı Merkez…	https://iasbh.tmgrup.com.tr/5c73ac/1200/675/0/13/860/498?u=https://isbh.tmgrup.com.tr/sbh/2024/12/23/burdurda-halk-otobusu-yangininda-kundaklama-suphesi-1734935705426.jpg	https://www.sabah.com.tr/yasam/burdurda-halk-otobusu-yangininda-kundaklama-suphesi-7203966	https://www.sabah.com.tr/yasam/burdurda-halk-otobusu-yangininda-kundaklama-suphesi-7203966	https://iasbh.tmgrup.com.tr/5c73ac/1200/675/0/13/860/498?u=https://isbh.tmgrup.com.tr/sbh/2024/12/23/burdurda-halk-otobusu-yangininda-kundaklama-suphesi-1734935705426.jpg	2024-12-23T09:36:29+03:00	Burdur'da halk otobüsleri yandı. Kendi otopark alanlarında meydana gelen yangınında 6 otobüsün 5'i tamamen yanarken biri son anda kurtarıldı. Gece 03.18'de ilk ihbarı yapılan yangın için kundaklama şüphesi de bulunuyor. Yangın gece saat 03.18'de Burdur merkez Aydınlıkevler Mahallesi Mahrukatcılar...	['Burdur']	23.12.2024	yangın
Facia ucuz atlatıldı! Turistleri taşıyan midibüs alev alev yandı		Olay, saat 21.30 sıralarında Gebze-Orhangazi-İzmir Otoyolu'nun Gemlik Viyadüğü yakınlarında meydana geldi. İstanbul istikametine seyir halinde olan İ.Ç (41), yönetimindeki turistlerin bulunduğu midibüsün motor bölünden dumanlar yükselmeye başladı. Durumu fark eden sürücü İ.Ç. (41), aracı emniyet şeridinde durdurup, Suudi Arabistan uyruklu 35 turisti midibüsten tahliye etti, ardından 112 Acil Çağr…	https://iasbh.tmgrup.com.tr/b8c72d/1200/675/0/0/800/450?u=https://isbh.tmgrup.com.tr/sbh/2024/12/24/turist-kafilesini-tasiyan-otobus-alev-topuna-dondu-facia-ucuz-atlatildi-1734995549003.jpeg	https://www.sabah.com.tr/yasam/facia-ucuz-atlatildi-turistleri-tasiyan-otobus-alev-alev-yandi-7205075	https://www.sabah.com.tr/yasam/facia-ucuz-atlatildi-turistleri-tasiyan-otobus-alev-alev-yandi-7205075	https://iasbh.tmgrup.com.tr/b8c72d/1200/675/0/0/800/450?u=https://isbh.tmgrup.com.tr/sbh/2024/12/24/turist-kafilesini-tasiyan-otobus-alev-topuna-dondu-facia-ucuz-atlatildi-1734995549003.jpeg	2024-12-24T02:14:28+03:00	Bursa’nın Orhangazi ilçesinde, Suudi Arabistan uyruklu 35 turistin bulunduğu midibüs, seyir halindeyken alev alıp yanmaya başladı. Sürücünün yolcuları tahliye etmesinden sonra alev topuna dönen midibüs demir yığını haline dönüşürken, olayda yaralanan olmadı Olay, saat 21.30 sıralarında...	['Bursa', 'Orhangazi', 'Suudi Arabistan', '112 Acil Çağrı Merkezi']	23.12.2024	yangın
Samsun'da korkutan olay: Park halindeki araç alev topuna döndü!		Yangın, İshaklı Mahallesi Samsun-Sinop kara yolu yan yolunda bir apartmanın altında meydana geldi. Edinilen bilgiye göre, 3 katlı binanın altında bulunan boş dükkanda park halindeki Ahmet Kurt'a ait minibüste yangın çıktı. Dumanları gören bir vatandaşın ihbarı üzerine olay yerine gelen Büyükşehir Belediyesi itfaiye ekipleri yangına müdahale ederek kontrol altına aldı. İtfaiye ekiplerinin müdahale…	https://iasbh.tmgrup.com.tr/f143aa/1200/675/0/0/1362/767?u=https://isbh.tmgrup.com.tr/sbh/2024/12/21/samsunda-korkutan-olay-park-halindeki-arac-alev-topuna-dondu-1734781716749.jpg	https://www.sabah.com.tr/yasam/samsunda-korkutan-olay-park-halindeki-arac-alev-topuna-dondu-7202440	https://www.sabah.com.tr/yasam/samsunda-korkutan-olay-park-halindeki-arac-alev-topuna-dondu-7202440	https://iasbh.tmgrup.com.tr/f143aa/1200/675/0/0/1362/767?u=https://isbh.tmgrup.com.tr/sbh/2024/12/21/samsunda-korkutan-olay-park-halindeki-arac-alev-topuna-dondu-1734781716749.jpg	2024-12-21T14:49:19+03:00	Samsun'un Bafra ilçesinde alevlere teslim olan park halindeki minibüsten geriye demir yığını kaldı. Yangın, İshaklı Mahallesi Samsun-Sinop kara yolu yan yolunda bir apartmanın altında meydana geldi. Edinilen bilgiye göre, 3 katlı binanın altında bulunan boş dükkanda park halindeki Ahmet Kurt'a ait...	['Samsun', 'Bafra', 'Ahmet Kurt', 'Sinop', 'Büyükşehir Belediyesi', 'İshaklı Mahallesi']	21.12.2024	yangın
11 katlı binada önce patlama sonra yangın çıktı		Akat Mahallesi Necati Cumalı Sokak'ta bulunan Bahar Sitesi'ndeki 11 katlı binanın 8'inci katında saat 21.30 sıralarında henüz bilinmeyen bir nedenle meydana gelen patlamanın ardından yangın çıktı. İhbar üzerine olay yerine polis, itfaiye ve sağlık ekipleri sevk edildi. Bu sırada apartman sakinleri, binadan kendi imkanlarıyla çıkmayı başarırken, 2 kişi içeride mahsur kaldı. Olay yerine gelen itfai…	https://iasbh.tmgrup.com.tr/6ed4da/1200/675/0/25/706/422?u=https://isbh.tmgrup.com.tr/sbh/2024/12/21/11-katli-binada-once-patlama-sonrasinda-yangin-cikti-1734781625664.jpg	https://www.sabah.com.tr/yasam/11-katli-binada-once-patlama-sonrasinda-yangin-cikti-7202439	https://www.sabah.com.tr/yasam/11-katli-binada-once-patlama-sonrasinda-yangin-cikti-7202439	https://iasbh.tmgrup.com.tr/6ed4da/1200/675/0/25/706/422?u=https://isbh.tmgrup.com.tr/sbh/2024/12/21/11-katli-binada-once-patlama-sonrasinda-yangin-cikti-1734781625664.jpg	2024-12-21T14:47:41+03:00	İstanbul Beşiktaş’ta 11 katlı binanın 8'inci katında önce patlama yaşandı, ardından yangın çıktı. İtfaiye ekipleri tarafından söndürülen yangında binada mahsur kalarak kurtarılan 2 kişi, tedbir amacıyla hastaneye kaldırıldı. Akat Mahallesi Necati Cumalı Sokak'ta bulunan Bahar Sitesi'ndeki 11 katlı...	['İstanbul']	21.12.2024	yangın
Kaza sonrası yanmaya başlayan araçtan baygın sürücü son anda kurtarıldı		Kendisi gibi İmam-Hatip olan Arif Emre Bilen ve fabrika işçisi arkadaşları Samet Orak ile namaz vaktinin yaklaşmasıyla araçla görev yaptığı Hacı Mehmet Karaman Mescidi'ne giderken karşılaştıkları kaza sonrası yanan otomobildeki sürücüyü koluna girip kurtardıklarını anlatan 29 yaşındaki Muhammed Mücahit Ayrancı, “Sürücü baygın haldeydi. Kafasında kanama vardı. Araçtan indirip hemen ambulansa, itfa…	https://image.milimaj.com/i/milliyet/75/0x0/676abcd34870ab9862fc74fa.jpg	https://www.milliyet.com.tr/gundem/kaza-sonrasi-yanmaya-baslayan-aractan-baygin-surucu-son-anda-kurtarildi-7266298	https://www.milliyet.com.tr/gundem/kaza-sonrasi-yanmaya-baslayan-aractan-baygin-surucu-son-anda-kurtarildi-7266298	https://image.milimaj.com/i/milliyet/75/0x0/676abcd34870ab9862fc74fa.jpg	2024-12-24T17:01:45+03:00	Amasya'da dün meydana gelen kazada yanmaya başlayan otomobilin içindeki baygın sürücüyü çıkartarak son anda yanmaktan kurtaran 3 vatandaştan İmam Muhammed Mücahit Ayrancı, güvenlik kamerasına saniye saniye yansıyan o anları anlattı.	['kaza', 'amasya', 'arif emre bilen']	24.12.2024	yangın
Silivri'de park halindeki otomobili benzin döküp yaktı		Olay, saat 04.00 sıralarında Yeni Mahalle Çelebi Sokak'ta meydana geldi. Otomobilin alev alev yandığını fark eden çevre sakinleri ihbarda bulundu. Olay yerine itfaiye ve polis ekipleri sevk edildi. Kısa sürede alevlere teslim olan otomobildeki yangın, itfaiye ekipleri tarafından söndürüldü. Haberin Devamı ATEŞE VERDİĞİ ANLAR KAMERADA Araç kullanılamaz hale gelirken, otomobilin benzin dökülerek ya…	https://image.milimaj.com/i/milliyet/75/0x0/676ab3eb4870ab9862fc748e.jpg	https://www.milliyet.com.tr/gundem/silivride-park-halindeki-otomobili-benzin-dokup-yakti-7266283	https://www.milliyet.com.tr/gundem/silivride-park-halindeki-otomobili-benzin-dokup-yakti-7266283	https://image.milimaj.com/i/milliyet/75/0x0/676ab3eb4870ab9862fc748e.jpg	2024-12-24T16:17:00+03:00	Silivri'de sabah saatlerinde park halindeki bir otomobil kimliği belirsiz bir kişi tarafından ateşe verildi. Benzin dökülerek yakılan otomobil kullanılamaz hale gelirken, aracın alevlere teslim olduğu anlar güvenlik kamerasına yansıdı.	['silivri', 'kundaklama', 'yangin']	24.12.2024	yangın
Facianın eşiğinden dönüldü! Turistleri taşıyan otobüs bir anda alev topuna döndü		Bursa'da turistleri taşıyan otobüsün motorunda yangın çıktı. Sürücü aracı emniyet şeridine çekip 35 Suudi Arabistanlı turisti indirirken, alev topuna dönen otobüs kül oldu. Haberin Devamı Olay, saat 21.30 sıralarında Gebze-Orhangazi-İzmir Otoyolu Gemlik Viyadüğü yakınlarında meydana geldi. Edinilen bilgiye göre, Bursa istikametinden İstanbul istikametine seyir halinde olan ve içinde 35 kişilik tu…	https://image.milimaj.com/i/milliyet/75/0x0/6769cf4c784fa370e2d2bc99.jpg	https://www.milliyet.com.tr/gundem/facianin-esiginden-donuldu-turistleri-tasiyan-otobus-bir-anda-alev-topuna-dondu-7265642	https://www.milliyet.com.tr/gundem/facianin-esiginden-donuldu-turistleri-tasiyan-otobus-bir-anda-alev-topuna-dondu-7265642	https://image.milimaj.com/i/milliyet/75/0x0/6769cf4c784fa370e2d2bc99.jpg	2024-12-24T00:00:00+03:00	Bursa'da turistleri taşıyan otobüs bir anda alev topuna döndü. Kullanılamaz hale gelen otobüsten yolcuları şoför son anda indirdi. İşte detaylar...	['bursa', 'turist', 'yangin']	23.12.2024	yangın
Samsun'da 9 yaşındaki çocuk otomobille dehşet saçtı! 3'ü ağır 5 yaralı		Samsun'un Çarşamba ilçesinde 9 yaşındaki çocuğun kullandığı otomobille kamyonun çarpıştığı kazada 3’ü ağır 5 kişi yaralandı. Haberin Devamı Kaza saat 18.00 sıralarında meydana geldi. Çarşamba ilçesi Umut Mahallesi 615. Sokak'tan Ayvacık yolu istikametine seyir halinde olan F.Ö. idaresindeki 06 COB 58 plakalı kamyon, bir düğün salonunun otoparkından kontrolsüz olarak çıkan 9 yaşındaki çocuğun kull…	https://image.milimaj.com/i/milliyet/75/0x0/6769b58e784fa370e2d2bc5d.jpg	https://www.milliyet.com.tr/gundem/samsunda-9-yasindaki-cocuk-otomobille-dehset-sacti-3u-agir-5-yarali-7265611	https://www.milliyet.com.tr/gundem/samsunda-9-yasindaki-cocuk-otomobille-dehset-sacti-3u-agir-5-yarali-7265611	https://image.milimaj.com/i/milliyet/75/0x0/6769b58e784fa370e2d2bc5d.jpg	2024-12-23T22:10:00+03:00	Samsun Çarşamba'da 9 yaşındaki çocuk kullandığı otomobil ile dehşet saçtı. Otomobil ile kamyonun çarpışması sonucu 3'ü ağır 5 kişi yaralandı. İşte detaylar...	['samsun', 'kaza', 'carsamba']	23.12.2024	yangın
Bursa'da gıda deposundaki dev yangın! Şehri aydınlattı		Bursa'nın Yıldırım ilçesinde bir marketin deposunda yangın çıktı. Yangına çok sayıda itfaiye ekibinin müdahalesi sürüyor. Haberin Devamı Yangın, saat 19.00 sıralarında merkez Yıldırım ilçesi Samanlı Mahallesi'nde bulunan Dip Toptan ve Perakende Satış Mağazaları'na ait depoda çıktı. Edinilen bilgiye göre, çatı tamiri esnasında çıkan yangın kısa sürede büyüdü. İhbar üzerine olay yerine çok sayıda i…	https://image.milimaj.com/i/milliyet/75/0x0/6769b106784fa370e2d2bc25.jpg	https://www.milliyet.com.tr/gundem/bursada-gida-deposundaki-dev-yangin-sehri-aydinlatti-7265597	https://www.milliyet.com.tr/gundem/bursada-gida-deposundaki-dev-yangin-sehri-aydinlatti-7265597	https://image.milimaj.com/i/milliyet/75/0x0/6769b106784fa370e2d2bc25.jpg	2024-12-23T21:50:00+03:00	Bursa Yıldırım'da bir gıda deposunda büyük yangın çıktı. Yangına çok sayıda itfaiye ekibi müdahale etti. Çıkan büyük yangın geceyi aydınlattı. İşte detaylar...	['bursa', 'yangin', 'gida']	23.12.2024	yangın
İstanbul'da depremde en kritik bölgeler! 'Büyük kıyameti bekliyoruz'		İstanbul Teknik Üniversitesi (İTÜ) Afet Yönetim Enstitüsü Müdürü Prof. Dr. Mikdat Kadıoğlu, Üsküdar Kuzguncuk'taki mahallelerde riskli ve tehdit unsuru oluşturan yapıları inceledi. Mahallelerde depreme karşı hasarlı yapıların tespiti ve çözümü için şehir risk avcılığı ve şehir risk analizi yapmak ve farkındalık oluşturmak için hayata geçirilen eğitim programına çevre sakinleri de ilgi gösterdi. H…	https://image.milimaj.com/i/milliyet/75/0x0/67693a3330363706df971ede.jpg	https://www.milliyet.com.tr/gundem/istanbulda-depremde-en-kritik-bolgeler-buyuk-kiyameti-bekliyoruz-7265222	https://www.milliyet.com.tr/gundem/istanbulda-depremde-en-kritik-bolgeler-buyuk-kiyameti-bekliyoruz-7265222	https://image.milimaj.com/i/milliyet/75/0x0/67693a3330363706df971ede.jpg	2024-12-23T13:23:00+03:00	İstanbul Teknik Üniversitesi (İTÜ) Afet Yönetim Enstitüsü Müdürü Prof. Dr. Mikdat Kadıoğlu, beklenen İstanbul depremine ilişkin dikkat çeken açıklamalarda bulundu.	['deprem', 'istanbul', 'marmara']	23.12.2024	yangın
Yangında ölen çiftin oğlundan korkunç iddia! 'Bu doğal yollarla olabilecek bir şey değil'		Beyşehir ilçesi Üzümlü Mahallesi'ndeki yaylada hayvancılık yapan Zeki ve Aynur Özbay çiftinin barakadan yaptıkları evde, 18 Aralık'ta saat 02.30 sıraları bilinmeyen nedenle yangın çıktı. Alevleri fark eden çevredekilerin ihbarıyla adrese jandarma, itfaiye ve sağlık ekipleri sevk edildi. İtfaiye ekiplerinin müdahalesiyle baraka, ahır ve samanlıktaki alevler söndürüldü. Haberin Devamı Ekipler, içer…	https://image.milimaj.com/i/milliyet/75/0x0/67690c61784fa370e2d2b8ed.jpg	https://www.milliyet.com.tr/gundem/yanginda-olen-ciftin-oglundan-korkunc-iddia-bu-dogal-yollarla-olabilecek-bir-sey-degil-7265076	https://www.milliyet.com.tr/gundem/yanginda-olen-ciftin-oglundan-korkunc-iddia-bu-dogal-yollarla-olabilecek-bir-sey-degil-7265076	https://image.milimaj.com/i/milliyet/75/0x0/67690c61784fa370e2d2b8ed.jpg	2024-12-23T10:09:43+03:00	Konya’nın Beyşehir ilçesinde kaldıkları barakada çıkan yangında hayatını kaybeden Zeki (62) ile Aynur Özbay (57) çiftinin oğlu İbrahim Özbay korkunç bir iddiada bulundu.	['yangin', 'olum', 'zeki ozbay', 'aynur ozbay']	23.12.2024	yangın
Burdur'da feci yangın! Tam 6 halk otobüsü küle döndü		Burdur'da çıkan yangın sonucu, 6 özel halk otobüsünde hasar oluştu. Aydınlıkevler Mahallesi'ndeki Burdur Özel Halk Otobüsleri Kooperatifi otoparkında park halindeki otobüslerin birinde yangın çıktı. Haberin Devamı Hızla diğer otobüslere de yayılan yangını görenlerin ihbarı üzerine olay yerine 112 Acil Sağlık, itfaiye ve polis ekipleri sevk edildi. İtfaiye ekiplerinin müdahalesiyle söndürülen yang…	https://image.milimaj.com/i/milliyet/75/0x0/6768d904784fa370e2d2b813.jpg	https://www.milliyet.com.tr/gundem/burdurda-feci-yangin-tam-6-halk-otobusu-kule-dondu-7265017	https://www.milliyet.com.tr/gundem/burdurda-feci-yangin-tam-6-halk-otobusu-kule-dondu-7265017	https://image.milimaj.com/i/milliyet/75/0x0/6768d904784fa370e2d2b813.jpg	2024-12-23T06:29:00+03:00	Burdur'da feci bir yangın meydana geldi. Yangında tam 6 özel halk otobüsü yanarak kullanılamaz hale geldi. İşte detaylar...	['burdur', 'yangin', 'halk otobusu']	23.12.2024	yangın
Alev alev yanan araçta 'kundaklama' şoku! Ailenin şüphelendiği tek isim var		Olay, önceki gece 03.15 sıralarında Kepez ilçesi Güneş Mahallesi 6025 Sokak üzerinde bulunan bir sitenin otoparkında meydana geldi. Sitenin bahçesinde park halindeki 07 ZT 348 plakalı otomobilin yandığını gören vatandaşlar 112 Acil Çağrı Merkezi'ni arayarak durumu bildirdi. İhbarla verilen adrese çok sayıda itfaiye ve polis ekibi sevk edilirken, otomobilin alevlere teslim olduğu o anlar cep telef…	https://image.milimaj.com/i/milliyet/75/0x0/676539a60e175e36031eb7a5.jpg	https://www.milliyet.com.tr/gundem/alev-alev-yanan-aracta-kundaklama-soku-ailenin-suphelendigi-tek-isim-var-7263132	https://www.milliyet.com.tr/gundem/alev-alev-yanan-aracta-kundaklama-soku-ailenin-suphelendigi-tek-isim-var-7263132	https://image.milimaj.com/i/milliyet/75/0x0/676539a60e175e36031eb7a5.jpg	2024-12-20T12:33:00+03:00	Antalya'da park halindeki bir araç, çıkan yangında kullanılamaz hale geldi. Yangın anı cep telefonu ile görüntülenirken, bir kişinin yangının başlangıcından saniyeler sonra bölgeden koşarak uzaklaştığı anlar güvenlik kamerasına yansıdı. Yangında küle dönen otomobilin sahibi, olayı eski damadının gerçekleştirdiğini iddia edip kamera kayıtları ile birlikte karakola giderek şikayetçi oldu.	['antalya', 'kepez', 'yangin']	20.12.2024	yangın
Ordu'da sobadan çıkan yangın faciaya sebep oldu: 1 ölü		Yangın, bu akşam saatlerinde Perşembe ilçesine bağlı Sırakovancı Mahallesi’nde çıktı. Emine Güngör’ün (94), yalnız yaşadığı evden dumanların yükseldiğini gören çevredekiler, durumu 112 Acil Çağrı Merkezi’ne bildirdi. Bu sırada mahalle sakinleri kendi imkanlarıyla yangına müdahale etmeye çalıştı. Rüzgarlı havanın da etkisiyle alevler kısa sürede büyüyerek, bitişiğindeki ahşap iki eve de sıçradı. B…	https://image.milimaj.com/i/milliyet/75/0x0/676454aa30363706df970953.jpg	https://www.milliyet.com.tr/gundem/orduda-sobadan-cikan-yangin-faciaya-sebep-oldu-1-olu-7262695	https://www.milliyet.com.tr/gundem/orduda-sobadan-cikan-yangin-faciaya-sebep-oldu-1-olu-7262695	https://image.milimaj.com/i/milliyet/75/0x0/676454aa30363706df970953.jpg	2024-12-19T20:16:00+03:00	Ordu’nun Perşembe ilçesinde bir evde çıkan ve bitişiğindeki iki eve de sıçrayan yangında 1 kişi hayatını kaybetti. İtfaiyenin müdahalesiyle söndürülen yangında 2 ev kullanılamaz hale geldi, 1 evde de hasar oluştu.	['ordu', 'soba', 'yangin']	19.12.2024	yangın
Fotoğraf çektirmek için geliyorlar! Gören şaşkına dönüyor		İlçe merkezinde yaşayan evli, 3 çocuk babası Mehmet Çataltaş, sanayi sitesinde yaklaşık 25 yıldır demir doğrama işiyle uğraşıyor. Çocuk yaşlarda başladığı mesleğin içinde büyüyen Çataltaş, zamanla kendini geliştirip, işletmede kullandığı hurdaya çıkan malzemeleri de değerlendirmeye başladı. Haberin Devamı Hurdalardan ilk başta heykel yapan Mehmet Çataltaş, elindeki çeşitli malzemeleri de gemi, he…	https://image.milimaj.com/i/milliyet/75/0x0/6763e03930363706df9703d2.jpg	https://www.milliyet.com.tr/gundem/fotograf-cektirmek-icin-geliyorlar-goren-saskina-donuyor-7262207	https://www.milliyet.com.tr/gundem/fotograf-cektirmek-icin-geliyorlar-goren-saskina-donuyor-7262207	https://image.milimaj.com/i/milliyet/75/0x0/6763e03930363706df9703d2.jpg	2024-12-19T12:01:17+03:00	Sivas’ın Suşehri ilçesinde yaşayan demir doğrama ustası Mehmet Çataltaş (40), çocuk yaşlarda başladığı mesleğine yeni bir boyut kazandırdı. Atık hurda malzemeleri değerlendiren Çataltaş, bunları heykel ile otomobil, gemi ve helikopter maketlerine dönüştürüyor.	['sivas', 'atik malzeme', 'mehmet cataltas', 'heykel']	19.12.2024	yangın
Bahçelievler'de sanayi sitesinde yangın! İtfaiye ekipleri bölgede		Haberin Devamı Yenibosna Merkez Mahallesi'ndeki Doğu Sanayi Sitesi'nde iki katlı matbaa kalıp atölyesinde bilinmeyen nedenle yangın çıktı. İhbar üzerine bölgeye polis ve itfaiye ekibi sevk edildi. İtfaiye ekiplerinin müdahalesiyle kısa sürede söndürülen yangın, iş yerinde hasara yol açtı.	https://image.hurimg.com/i/hurriyet/75/0x0/676a8271653c1dc3556546c9.jpg	https://www.hurriyet.com.tr/gundem/bahcelievlerde-sanayi-sitesinde-yangin-itfaiye-ekipleri-bolgede-42636416	https://www.hurriyet.com.tr/gundem/bahcelievlerde-sanayi-sitesinde-yangin-itfaiye-ekipleri-bolgede-42636416	https://image.hurimg.com/i/hurriyet/75/0x0/676a8271653c1dc3556546c9.jpg	2024-12-24T12:44:28+03:00	Haberler - İstanbul'un Bahçelievler ilçesinde sanayi sitesinde bir iş yerinde yangın çıktı. Yangın itfaiye ekiplerinin alevlere müdahalesi ile söndürüldü.	['Bahçelievler', 'istanbul', 'yangın']		yangın
Büyük İstanbul depreminde en çok bu bölgeler etkilenecek! Prof. Dr. Mikdat Kadıoğlu en kritik noktaları açıklayıp uyardı: Esas burada yaşayanlar eksikleri görmeli		Haberin Devamı İstanbul Teknik Üniversitesi (İTÜ) Afet Yönetim Enstitüsü Müdürü Prof. Dr. Mikdat Kadıoğlu, Üsküdar Kuzguncuk'taki mahallelerde riskli ve tehdit unsuru oluşturan yapıları inceledi. Mahallelerde depreme karşı hasarlı yapıların tespiti ve çözümü için şehir risk avcılığı ve şehir risk analizi yapmak ve farkındalık oluşturmak için hayata geçirilen eğitim programına çevre sakinleri de i…	https://image.hurimg.com/i/hurriyet/75/0x0/67693b0efd3bc121d1d58f77.jpg	https://www.hurriyet.com.tr/gundem/buyuk-istanbul-depreminde-en-cok-bu-bolgeler-etkilenecek-prof-dr-mikdat-kadioglu-en-kritik-noktalari-aciklayip-uyardi-42635388	https://www.hurriyet.com.tr/gundem/buyuk-istanbul-depreminde-en-cok-bu-bolgeler-etkilenecek-prof-dr-mikdat-kadioglu-en-kritik-noktalari-aciklayip-uyardi-42635388	https://image.hurimg.com/i/hurriyet/75/0x0/67693b0efd3bc121d1d58f77.jpg	2024-12-23T13:14:58+03:00	Haberler - İstanbul Teknik Üniversitesi (İTÜ) Afet Yönetim Enstitüsü Müdürü Prof. Dr. Mikdat Kadıoğlu, Halkın artık bazı şeyleri dikkate alması lazım. Çünkü bu bizim mahallemizde toplum tabanlı afete hazırlık, toplumun duyarlılığıyla başlıyor ve kendi sokağında, mahallesinde temizlikle başlıyor ve herkes sokağını...	['Deprem', 'Büyük İstanbul depremi', 'İstanbul']		yangın
Karı koca hayatını kaybetmişti! Oğullarından kan donduran iddia: Bu doğal yollarla olacak şey değil		Haberin Devamı Beyşehir ilçesi Üzümlü Mahallesi'ndeki yaylada hayvancılık yapan Zeki ve Aynur Özbay çiftinin barakadan yaptıkları evde, 18 Aralık'ta saat 02.30 sıraları bilinmeyen nedenle yangın çıktı. Alevleri fark eden çevredekilerin ihbarıyla adrese jandarma, itfaiye ve sağlık ekipleri sevk edildi. İtfaiye ekiplerinin müdahalesiyle baraka, ahır ve samanlıktaki alevler söndürüldü. Ekipler, içer…	https://image.hurimg.com/i/hurriyet/75/0x0/67690cb2fd3bc121d1d58ddc.jpg	https://www.hurriyet.com.tr/gundem/kari-koca-hayatini-kaybetmisti-ogullarindan-kan-donduran-iddia-bu-dogal-yollarla-olacak-sey-degil-42635113	https://www.hurriyet.com.tr/gundem/kari-koca-hayatini-kaybetmisti-ogullarindan-kan-donduran-iddia-bu-dogal-yollarla-olacak-sey-degil-42635113	https://image.hurimg.com/i/hurriyet/75/0x0/67690cb2fd3bc121d1d58ddc.jpg	2024-12-23T10:13:15+03:00	Son Dakika Haber - Konya'nın Beyşehir ilçesinde kaldıkları barakada çıkan yangında hayatını kaybeden Zeki (62) ile Aynur Özbay (57) çiftinin oğlu İbrahim Özbay, Hiç kimseyle kavgalı değiller. Borçları, alacakları yok. Hiç kimseyle husumetli değiliz. Ortada hiçbir şey yokken yangın meydana geldi. Kundaklamadan...	['Konya', 'Cinayet', 'Beyşehir']		yangın
Brezilya'da uçak yerleşim bölgesine düştü: 10 ölü		Haberin Devamı Brezilya'nın Rio Grande do Sul eyaletinde yer alan turistik şehir Gramado'da küçük uçak yerleşim bölgesine düştü. Kazada uçakta bulunan 10 kişi hayatını kaybetti. Rio Grande do Sul Valisi Eduardo Leite yaptığı açıklamada, “Maalesef ilk bilgiler uçaktaki yolcuların hayatta kalamadığını gösteriyor" dedi. Yetkililer, uçağın düştüğü bölgede yangın çıktığını ve 15 kişinin dumandan etkil…	https://image.hurimg.com/i/hurriyet/75/0x0/67684d316f0e7dbf7da477f3.jpg	https://www.hurriyet.com.tr/gundem/brezilyada-ucak-yerlesim-bolgesine-dustu-10-olu-42634847	https://www.hurriyet.com.tr/gundem/brezilyada-ucak-yerlesim-bolgesine-dustu-10-olu-42634847	https://image.hurimg.com/i/hurriyet/75/0x0/67684d316f0e7dbf7da477f3.jpg	2024-12-22T20:32:37+03:00	Son Dakika Haberler - Brezilya'nın güneyinde küçük uçağın düşmesi sonucu 10 kişinin hayatını kaybettiği belirtildi.	['Brezilya', 'uçak', 'kaza', 'KAZA']		yangın
Şişli'de dairede çıkan yangın çatıya sıçradı		Haberin Devamı Yangın, Şişli Mahmut Şevket Paşa Mahallesi Çamözü Sokak'ta bulunan üç katlı binanın 3'üncü katında saat 07.30 sıralarında çıktı. Edinilen bilgiye göre, sobadan çıkan yangın kısa sürede büyüyerek binanın çatısına sıçradı. Evin yandığını anlayan bina sakinleri kendilerini dışarıya attı. İTFAİYE BÜYÜK ÇABA SARFETTİ Yangın kısa sürede tüm çatıyı sardı. İhbar edilmesi üzerine olay yerin…	https://image.hurimg.com/i/hurriyet/75/0x0/67651a11ec59db53aab5073f.jpg	https://www.hurriyet.com.tr/gundem/sislide-dairede-cikan-yangin-catiya-sicradi-42632225	https://www.hurriyet.com.tr/gundem/sislide-dairede-cikan-yangin-catiya-sicradi-42632225	https://image.hurimg.com/i/hurriyet/75/0x0/67651a11ec59db53aab5073f.jpg	2024-12-20T10:17:53+03:00	Son Dakika Haber - Şişli'de üç katlı binanın 3'üncü katında sobadan çıktığı iddia edilen yangın, kısa sürede çatıya sıçradı. Binanın çatısı alev alev yanarken, apartman sakinleri kendilerini dışarıya atarak kurtardı. Yangın, itfaiye ekiplerinin müdahalesi ile kontrol altına alındı.	['İstanbul', 'Şişli', 'Yangın']		yangın
Konya'da evli çiftin öldüğü yangında kundaklama şüphesi		Haberin Devamı Beyşehir ilçesi Üzümlü Mahallesi'nde oturan Zeki ve Aynur Özbay çiftinin bağ evinde, dün saat 02.30 sıralarında bilinmeyen nedenle yangın çıktı. Alevleri fark eden çevredekilerin ihbarıyla adrese jandarma, itfaiye ve sağlık ekipleri sevk edildi. İtfaiye ekiplerinin müdahalesiyle bağ evi, ahır ve samanlıktaki alevler söndürüldü. Ekipler, içeriye girdiğinde Zeki ve Aynur Özbay çiftin…	https://image.hurimg.com/i/hurriyet/75/0x0/67640e974c39255d0d831d56.jpg	https://www.hurriyet.com.tr/gundem/konyada-evli-ciftin-oldugu-yanginda-kundaklama-suphesi-42631567	https://www.hurriyet.com.tr/gundem/konyada-evli-ciftin-oldugu-yanginda-kundaklama-suphesi-42631567	https://image.hurimg.com/i/hurriyet/75/0x0/67640e974c39255d0d831d56.jpg	2024-12-19T15:16:31+03:00	Son Dakika Haberler - Konya'da Zeki Özbay (62) ile eşi Aynur Özbay (57) çiftinin öldüğü yangının 3 noktada aynı anda çıktığı belirlendi. Kundaklama şüphesi üzerinde durulurken, çiftin cenazeleri toprağa verildi.	['konya', 'ev', 'yangın']		yangın
Kastamonu'nda korkutan yangın! Alevlere teslim olan ahşap ev küle döndü		Haberin Devamı Olay, saat 22.00 sıralarında Tosya ilçesi Küçükkızılca köyünde meydana geldi. Edinilen bilgiye göre, Mustafa Uysal'a ait, kullanılmayan iki katlı ahşap evde bilinmeyen sebeple yangın çıktı. Kısa sürede büyüyen yangın ahşap evi sardı. Yangını gören vatandaşlar durumu 112 Acil Çağrı Merkezine bildirdi. İhbar üzerine olay yerine Tosya Belediyesi itfaiye ekipleri sevk edildi. Olay yeri…	https://image.hurimg.com/i/hurriyet/75/0x0/6763652d4c39255d0d8319eb.jpg	https://www.hurriyet.com.tr/gundem/kastamonunda-korkutan-yangin-alevlere-teslim-olan-ahsap-ev-kule-dondu-42630872	https://www.hurriyet.com.tr/gundem/kastamonunda-korkutan-yangin-alevlere-teslim-olan-ahsap-ev-kule-dondu-42630872	https://image.hurimg.com/i/hurriyet/75/0x0/6763652d4c39255d0d8319eb.jpg	2024-12-19T03:13:51+03:00	Son Dakika Haberler - Kastamonu'nun Tosya ilçesinde alevlere teslim olan iki katlı ahşap ev kullanılmaz hale geldi, yangının sıçradığı bir evin çatısında da maddi hasar meydana geldi.	['Kastamonu', 'Tosya', 'yangın']		yangın
Narin Güran cinayeti soruşturmasında dikkat çeken gelişme! Amca Salim Güran'ın avukatı açıkladı		Haberin Devamı Merkez Bağlar ilçesinin Tavşantepe Mahallesi'nde 21 Ağustos'ta kaybolan ve 8 Eylül'de Eğertutmaz Deresi'nde cansız bedenine ulaşılan Narin Güran'ın öldürülmesine ilişkin tutuklu amca Salim, anne Yüksel ve ağabey Enes Güran ile komşuları Nevzat Bahtiyar "iştirak halinde çocuğa karşı kasten öldürme" suçundan ağırlaştırılmış müebbet hapis istemiyle yargılanıyor. SALİM GÜRAN’IN TELEFON…	https://image.hurimg.com/i/hurriyet/75/0x0/6762de99ec59db53aab4fca8.jpg	https://www.hurriyet.com.tr/gundem/narin-guran-cinayeti-sorusturmasinda-dikkat-ceken-gelisme-amca-salim-guranin-avukati-acikladi-42630596	https://www.hurriyet.com.tr/gundem/narin-guran-cinayeti-sorusturmasinda-dikkat-ceken-gelisme-amca-salim-guranin-avukati-acikladi-42630596	https://image.hurimg.com/i/hurriyet/75/0x0/6762de99ec59db53aab4fca8.jpg	2024-12-18T17:39:40+03:00	Son Dakika Haber - Diyarbakır'da 8 yaşındaki Narin Güran cinayetinde son olarak avucunda ve üzerinde bulunan saç ve kıl örneklerine ilişkin Adli Tıp Kurumu raporu, dava dosyasına eklenmişti. Soruşturmada gelişmeler devam ederken tutuklu Salim Güran’ın avukatı Onur Akdağ, müvekkilinin telefonunda bulunan adımsayar...	['narin güran', 'salim güran', 'diyarbakır']		yangın
Kahraman torun, babaannesini yangından kurtardı		Haberin Devamı Edinilen bilgiye göre, Varsaklar Mahallesi Sırkıntı Caddesi üzerindeki 2 katlı evde yalnız yaşayan Fatma Uçar'ın (65) evinde gece yangın çıktı. Alt katta kalan 10 yaşındaki torunu Ali Uçar, dumanları fark edip babaannesinin yanına gitti. Hemen dışarı çıkan babaanne ve torununun yardımına mahalleli koştu. İhbar üzerine adrese gelen itfaiye ekipleri yangını söndürdü. Evin çardak kısm…	https://image.hurimg.com/i/hurriyet/75/0x0/6762a77a7f2e37753c11f1b2.jpg	https://www.hurriyet.com.tr/gundem/kahraman-torun-babaannesini-yangindan-kurtardi-42630251	https://www.hurriyet.com.tr/gundem/kahraman-torun-babaannesini-yangindan-kurtardi-42630251	https://image.hurimg.com/i/hurriyet/75/0x0/6762a77a7f2e37753c11f1b2.jpg	2024-12-18T13:45:07+03:00	Son Dakika Haberler - Adana'da 2 katlı evde çıkan yangın, itfaiye ekiplerinin müdahalesiyle söndürüldü. Yangında 10 yaşındaki Ali Uçar'ın babaannesini uyandırıp hayatını kurtardığı ortaya çıktı.	['adana', 'yangın', 'ev']		yangın
Atölyedeki yangında hayatını kaybetmişti... 20 gün önce işe başladığı ortaya çıktı		Haberin Devamı Güzelyurt Mahallesi Şehit Komando Er Mustafa Göktürk Caddesi üzerindeki araç boyama atölyesinde dün akşam saat 22.00 sıralarında henüz bilinmeyen bir nedenden ötürü yangın çıktı. Çevredekilerin ihbarı üzerine olay yerine çok sayıda itfaiye, polis ve sağlık ekibi sevk edildi. Belirtilen adrese gelen ekipler, boya ve yanıcı maddelerden dolayı patlamaların meydana geldiği yangını sönd…	https://image.hurimg.com/i/hurriyet/75/0x0/6762a6063e0db7236bb0f0ea.jpg	https://www.hurriyet.com.tr/gundem/atolyedeki-yanginda-hayatini-kaybetmisti-20-gun-once-ise-basladigi-ortaya-cikti-42630248	https://www.hurriyet.com.tr/gundem/atolyedeki-yanginda-hayatini-kaybetmisti-20-gun-once-ise-basladigi-ortaya-cikti-42630248	https://image.hurimg.com/i/hurriyet/75/0x0/6762a6063e0db7236bb0f0ea.jpg	2024-12-18T13:39:17+03:00	Son Dakika Flaş Haberler - Antalya'da araç boyama atölyesinde çıkan ve iş yeri ile birlikte otobüs, minibüs ve bir otomobili küle döndüren yangında hayatını kaybeden 24 yaşındaki gencin 20 gün önce işe başladığı ortaya çıktı. İş yerinde 10 milyon liranın üzerinde zarar olduğunu belirten işletme sahibi ise, “Ben...	['yangın', 'atölye', 'Antalya']		yangın
Kahraman baba oğlunun hayatını kurtardı		Haberin Devamı Muratpaşa ilçesi Kızılsaray Mahallesi 84’üncü Sokak’taki bir 6 katlı apartmanın bodrum katında saat 14.30 sıralarında yangın çıktı. İbrahim A., bodrum kata inip, uyuşturucu madde kullandıktan sonra burada bulunan malzemeleri yaktı. Komşuların ihbarı üzerine adrese itfaiye ve polis ekipleri sevk edildi. İbrahim A.'nın babası Mahmut A. oğlunun yanına giderek, bodrumdan çıkmasını sağl…	https://image.hurimg.com/i/hurriyet/75/0x0/67602e63107ce52a8230914f.jpg	https://www.hurriyet.com.tr/gundem/kahraman-baba-oglunun-hayatini-kurtardi-42628080	https://www.hurriyet.com.tr/gundem/kahraman-baba-oglunun-hayatini-kurtardi-42628080	https://image.hurimg.com/i/hurriyet/75/0x0/67602e63107ce52a8230914f.jpg	2024-12-16T16:43:42+03:00	Haberler - Antalya'da bodrum katta yangın çıkaran madde bağımlısı İbrahim A. (31), babası Mahmut A. (60) tarafından kurtarıldı. Oğlunun uyuşturucudan kurtarılmasını isteyen Mahmut A., Onu kurtarmak isterken ben de ölüyordum dedi.	['antalya', 'muratpaşa', 'yangın']		yangın
İstanbul depremi için 'Büyük kıyameti bekliyoruz' dedi, kritik bölgeleri saydı		İstanbul Teknik Üniversitesi (İTÜ) Afet Yönetim Enstitüsü Müdürü Prof. Dr. Mikdat Kadıoğlu, Üsküdar Kuzguncuk'taki mahallelerde riskli ve tehdit unsuru oluşturan yapıları inceledi. Mahallelerde depreme karşı hasarlı yapıların tespiti ve çözümü için şehir risk avcılığı ve şehir risk analizi yapmak ve farkındalık oluşturmak için hayata geçirilen eğitim programına çevre sakinleri de ilgi gösterdi. H…	https://image.posta.com.tr/i/posta/75/0x0/67693ce4bb62dfa139510bf2.jpg	https://www.posta.com.tr/gundem/istanbul-depremi-icin-buyuk-kiyameti-bekliyoruz-dedi-kritik-bolgeleri-saydi-2801800	https://www.posta.com.tr/gundem/istanbul-depremi-icin-buyuk-kiyameti-bekliyoruz-dedi-kritik-bolgeleri-saydi-2801800	https://image.posta.com.tr/i/posta/75/0x0/67693ce4bb62dfa139510bf2.jpg	2024-12-23T13:35:22+03:00	Güncel Gündem Haberleri - Beklenen İstanbul depremine ilişkin dikkat çeken açıklamalarda bulunan İstanbul Teknik Üniversitesi (İTÜ) Afet Yönetim Enstitüsü Müdürü Prof. Dr. Mikdat Kadıoğlu, en kritik bölgeyi açıkladı ve 'Büyük kıyameti bekliyoruz' dedi.	['İstanbul', 'deprem', 'kıyamet']	23.12.2024	yangın
Makarna fabrikasındaki patlamada ihmaller zinciri		Sakarya’nın Hendek ilçesindeki makarna fabrikasında 15 Eylül’de meydana gelen patlamanın ardından yangın çıkmıştı. Soğutma çalışmaları sırasında işçilerden Mesut Şimay’ın (27) cansız bedenine ulaşılmıştı. Yaralanan 30 kişi hastanelere kaldırılmıştı. Patlamada ağır yaralanan Eray Kızıldağ (22) 4 Ekim’de, Güven Albayrak (24) 9 Ekim’de, Merve Menteş (26) 10 Ekim’de, Naim Karagüzel (35) de 14 Ekim’de…	https://image.posta.com.tr/i/posta/75/0x0/6765eeaa815c3941882cb923.jpg	https://www.posta.com.tr/gundem/makarna-fabrikasindaki-patlamada-ihmaller-zinciri-2800688	https://www.posta.com.tr/gundem/makarna-fabrikasindaki-patlamada-ihmaller-zinciri-2800688	https://image.posta.com.tr/i/posta/75/0x0/6765eeaa815c3941882cb923.jpg	2024-12-21T07:00:00+03:00	Güncel Gündem Haberleri - Sakarya’nın Hendek ilçesinde 5 kişinin can verdiği makarna fabrikasındaki patlamayla ilgili bilirkişi raporu hazırlandı. Raporda, yangın ve patlamanın; toz birikimi, mevzuattaki uygunsuzluklar ve önlem eksiklikleri nedeniyle meydana geldiği vurgulandı. Gerekli önlemlerin alınması durumunda olayın yaşanmayacağına dikkat çekildi.	['Makarnafabrikası', 'Makarnafabrikasıpatlama', 'GazeteHaberi']	21.12.2024	yangın
Oto tamircide acı son		ÜÇ ARAÇ KÜL OLDU Haberin Devamı Antalya’nın Aksu ilçesinde önceki akşam araç boyama atölyesinde yangın çıktı. Boya ve yanıcı maddelerden dolayı patlamaların meydana geldiği yangın, iki saatlik çalışmayla söndürüldü. İşyeri ile alevlerin sıçradığı otobüs, minibüs ve bir otomobil küle döndü. Söndürme çalışmalarının ardından dükkanın yazıhanesinde yattığı öğrenilen 24 yaşındaki Doğan Diken’in cansız…	https://image.posta.com.tr/i/posta/75/0x0/6763391b815c3941882ca8e9.jpg	https://www.posta.com.tr/gundem/oto-tamircide-aci-son-2799467	https://www.posta.com.tr/gundem/oto-tamircide-aci-son-2799467	https://image.posta.com.tr/i/posta/75/0x0/6763391b815c3941882ca8e9.jpg	2024-12-19T07:00:00+03:00	Gündem Haberleri - Antalya Aksu’da araç boyama atölyesinde yangın çıktı. Yangında, işyerinin yazıhanesinde uyuyan Doğan Diken, yaşamını yitirdi.	['ototamirci', 'Ototamirciyangın', 'GazeteHaberi']	19.12.2024	yangın
10 yaşındaki Ali'den büyük kahramanlık		Alt katta kalan 10 yaşındaki torunu Ali Uçar, dumanları fark edince üst katta uyuyan babaannesi Fatma Uçar'ın yanına gidip "Babaanne kalk, yangın çıktı" diyerek uyandırdı. Böylece ikisi de yanarak ölmekten kurtuldu. Fatma Uçar, "Torunum gelip 'Ev yanıyor' diye bağırınca uyandım. Beni torunum kurtardı" dedi.	https://image.posta.com.tr/i/posta/75/0x0/676336f4815c3941882ca8d8.jpg	https://www.posta.com.tr/gundem/10-yasindaki-aliden-buyuk-kahramanlik-2799465	https://www.posta.com.tr/gundem/10-yasindaki-aliden-buyuk-kahramanlik-2799465	https://image.posta.com.tr/i/posta/75/0x0/676336f4815c3941882ca8d8.jpg	2024-12-19T07:00:00+03:00	Güncel Gündem Haberleri - Adana Kozan'da Fatma Uçar'ın (65), iki katlı evinde gece yangın çıktı.	['Adana', 'adanayangın', 'GazeteHaberi']	19.12.2024	yangın
24 yaşındaki genç feci ölümü! Araçlarla birlikte alev alev yandı		Güzelyurt Mahallesi Şehit Komando Er Mustafa Göktürk Caddesi üzerindeki araç boyama atölyesinde saat 22.00 sıralarında henüz bilinmeyen bir nedenden ötürü yangın çıktı. Çevredekilerin ihbarı üzerine olay yerine çok sayıda itfaiye, polis ve sağlık ekibi sevk edildi. Belirtilen adrese gelen ekipler, boya ve yanıcı maddelerden dolayı patlamaların meydana geldiği yangını söndürebilmek için uzun uğraş…	https://image.posta.com.tr/i/posta/75/0x0/67628591815c3941882ca596.jpg	https://www.posta.com.tr/gundem/24-yasindaki-genc-feci-olumu-araclarla-birlikte-alev-alev-yandi-2798995	https://www.posta.com.tr/gundem/24-yasindaki-genc-feci-olumu-araclarla-birlikte-alev-alev-yandi-2798995	https://image.posta.com.tr/i/posta/75/0x0/67628591815c3941882ca596.jpg	2024-12-18T11:20:54+03:00	Güncel Gündem Haberleri - Antalya'da araç boyama atölyesinde çıkan yangın, yaklaşık 2 saat sonucunda söndürülebildi. Yangında iş yeri küle dönerken, alevlerin sıçradığı otobüs, minibüs ve bir otomobil de kullanılamaz halde geldi. 24 yaşındaki bir genç ise iş yeri içerisinde ölü bulundu.	['Antalya', 'araçboyamaatölyesi', 'Araçlabirlikteyandı']	18.12.2024	yangın
24 yaşındaki genç feci ölümü! Araçlarla birlikte alev alev yandı		Güzelyurt Mahallesi Şehit Komando Er Mustafa Göktürk Caddesi üzerindeki araç boyama atölyesinde saat 22.00 sıralarında henüz bilinmeyen bir nedenden ötürü yangın çıktı. Çevredekilerin ihbarı üzerine olay yerine çok sayıda itfaiye, polis ve sağlık ekibi sevk edildi. Haberin Devamı Belirtilen adrese gelen ekipler, boya ve yanıcı maddelerden dolayı patlamaların meydana geldiği yangını söndürebilmek …	https://image.posta.com.tr/i/posta/75/0x0/67628277251a02661a316f04.jpg	https://www.posta.com.tr/gundem/24-yasindaki-genc-feci-olumu-araclarla-birlikte-alev-alev-yandi-2798986	https://www.posta.com.tr/gundem/24-yasindaki-genc-feci-olumu-araclarla-birlikte-alev-alev-yandi-2798986	https://image.posta.com.tr/i/posta/75/0x0/67628277251a02661a316f04.jpg	2024-12-18T11:06:28+03:00	Gündem Haberleri - Antalya'da araç boyama atölyesinde çıkan yangın, yaklaşık 2 saat sonucunda söndürülebildi. Yangında iş yeri küle dönerken, alevlerin sıçradığı otobüs, minibüs ve bir otomobil de kullanılamaz halde geldi. 24 yaşındaki bir genç ise iş yeri içerisinde ölü bulundu.	['Antalya', 'yangın', 'araçboyamaatölyesi']	18.12.2024	yangın
Oğlunun hayatını kurtaran kahraman baba: Neredeyse ben de ölüyordum		Muratpaşa ilçesi Kızılsaray Mahallesi 84’üncü Sokak’taki bir 6 katlı apartmanın bodrum katında saat 14.30 sıralarında yangın çıktı. İbrahim A., bodrum kata inip, uyuşturucu madde kullandıktan sonra burada bulunan malzemeleri yaktı. Komşuların ihbarı üzerine adrese itfaiye ve polis ekipleri sevk edildi. İbrahim A.'nın babası Mahmut A. oğlunun yanına giderek, bodrumdan çıkmasını sağladı. Yangın itf…	https://image.posta.com.tr/i/posta/75/0x0/6760363fbb62dfa13950f983.jpg	https://www.posta.com.tr/gundem/oglunun-hayatini-kurtaran-kahraman-baba-neredeyse-ben-de-oluyordum-2798043	https://www.posta.com.tr/gundem/oglunun-hayatini-kurtaran-kahraman-baba-neredeyse-ben-de-oluyordum-2798043	https://image.posta.com.tr/i/posta/75/0x0/6760363fbb62dfa13950f983.jpg	2024-12-16T17:17:18+03:00	Güncel Gündem Haberleri - Antalya'da 31 yaşındaki madde bağımlısı İbrahim A., 60 yaşındaki babası Mahmut A tarafından kurtarıldı. Baba Mahmut A., 'Onu kurtarmak isterken ben de ölüyordum' dedi.	['Antalya', 'uyuşturucu', 'bağımlı']	16.12.2024	yangın
Korku dolu anlar! Belediye başkanı itfaiyecilerle birlikte yangına müdahale etti		Giresun Limanı'ndaki bir iş makinesinde, saat 14.30 sıralarında bilinmeyen nedenle yangın çıktı. 112 Acil Çağrı Merkezi'ne ihbarda bulunurken, bir program için liman sahasında olan Giresun Belediye Başkanı Fuat Köse, alevlerin yükseldiği noktaya çıktı. Haberin Devamı Bölgeye itfaiye ekipleri sevk edilirken, Başkan Köse çalışmaları koordine edip, müdahalede bulundu. Yangının kısa sürede söndürüldü…	https://image.posta.com.tr/i/posta/75/0x0/675c3f1443571b6822ca10df.jpg	https://www.posta.com.tr/gundem/korku-dolu-anlar-belediye-baskani-itfaiyecilerle-birlikte-yangina-mudahale-etti-2796408	https://www.posta.com.tr/gundem/korku-dolu-anlar-belediye-baskani-itfaiyecilerle-birlikte-yangina-mudahale-etti-2796408	https://image.posta.com.tr/i/posta/75/0x0/675c3f1443571b6822ca10df.jpg	2024-12-13T17:05:59+03:00	Gündem Haberleri - Giresun Limanı'nda bir iş makinesinde çıkan yangın, itfaiyenin müdahalesiyle söndürüldü. Bu sırada liman sahasında bulunan Belediye Başkanı Fuat Köse de itfaiye ekiplerinin çalışmasına destek verdi.	['yangın', 'itfaiye', 'belediyebaşkanı']	13.12.2024	yangın
Edirne'de yanarak hayatını kaybeden 4 gencin kimlikleri belli oldu		Kaza, saat 03.00 sıralarında Abdurrahman Mahallesi Güney Çevre Yolu üzerindeki Uzunkaldırım Caddesi'nin bağlantı yolunda meydana geldi. Sürücüsünün kontrolünü yitirdiği 59 DM 013 plakalı otomobil, tek katlı müstakil evin duvarına çarptı. Haberin Devamı Çarpmanın şiddetiyle alev alan otomobil yanmaya başladı. Mahallelinin ihbarıyla olay yerine polis, sağlık ve itfaiye ekipleri sevk edildi. Alev al…	https://image.posta.com.tr/i/posta/75/0x0/675c125c251a02661a3163d6.jpg	https://www.posta.com.tr/gundem/edirnede-yanarak-hayatini-kaybeden-4-gencin-kimlikleri-belli-oldu-2796293	https://www.posta.com.tr/gundem/edirnede-yanarak-hayatini-kaybeden-4-gencin-kimlikleri-belli-oldu-2796293	https://image.posta.com.tr/i/posta/75/0x0/675c125c251a02661a3163d6.jpg	2024-12-13T13:54:24+03:00	Gündem Haberleri - Edirne'de müstakil eve çarptıktan sonra alev alan otomobilde hayatını kaybeden 4 kişinin üniversite öğrencileri İlker Bulur (20), Buse Beril Altan (18), Cansel Atmaca (20) ve hamburgercide çalışan Görkem Eroğlu (22) olduğu belirlendi.	['Edirne', 'GörkemEroğlu', 'yangın']	13.12.2024	yangın
İstanbul’da yangın mı var? İstanbul’da nerede, ne yangını var? İSTANBUL YANGIN SON DAKİKA!		İstanbul’da yükselmekte olan dumanlar nedeniyle birçok vatandaş tarafından yangına dair araştırmalar gerçekleştiriliyor ve yangının nerede, neden çıktığı da araştırılmakta. Meydana gelen yangının arından bölgeye sevk edilen ekipler, alevleri kontrol altına almak için çalışmalarını sürdürüyor. Peki, İstanbul’da yangın mı var? İstanbul’da nerede, ne yangını var?	https://image.posta.com.tr/i/posta/75/0x0/67592d19bb62dfa13950ea48.jpg	https://www.posta.com.tr/gundem/istanbulda-yangin-mi-var-istanbulda-nerede-ne-yangini-var-istanbul-yangin-son-dakika-2794841	https://www.posta.com.tr/gundem/istanbulda-yangin-mi-var-istanbulda-nerede-ne-yangini-var-istanbul-yangin-son-dakika-2794841	https://image.posta.com.tr/i/posta/75/0x0/67592d19bb62dfa13950ea48.jpg	2024-12-11T09:11:00+03:00	Güncel Gündem Haberleri - İstanbul’da meydana gelen yangın, şehir genelinde endişeye yol açtı. Son dakika bilgilerine göre, olayın detayları ve yangının çıktığı bölge hakkında açıklamalar gelmeye devam ediyor. Peki, İstanbul’da yangın mı var? İstanbul’da nerede, ne yangını var?	['istanbul', 'yangın', 'itfaiye', 'SeoHaber']	11.12.2024	yangın
Fatih Çemberlitaş'ta ayakkabı dükkanında yangın		Olay yerine çok sayıda itfaiye ekibi sevk edildi. Ekiplerin çalışması sürüyor. Haberin Devamı TRAMVAY SEFERLERİNDE AKSAMA Metro İstanbul'un sosyal medya hesabından yapılan duyuruda, "Çemberlitaş-Beyazıt bölgesindeki bir binada çıkan yangına itfaiye ekiplerinin müdahalesi nedeniyle, T1 Kabataş-Bağcılar Tramvay Hattı'nda seferler Kabataş-Sultanahmet ve Beyazıt-Bağcılar istasyonları arasında yapılma…	https://image.posta.com.tr/i/posta/75/0x0/67592b9c251a02661a3153b1.jpg	https://www.posta.com.tr/gundem/fatih-cemberlitasta-ayakkabi-dukkaninda-yangin-2794838	https://www.posta.com.tr/gundem/fatih-cemberlitasta-ayakkabi-dukkaninda-yangin-2794838	https://image.posta.com.tr/i/posta/75/0x0/67592b9c251a02661a3153b1.jpg	2024-12-11T09:05:00+03:00	Gündem Haberleri - Fatih Çemberlitaş Doğramacı Sokak'ta bulunan 3 katlı binanın birinci katındaki ayakkabı dükkanında yangın çıktı. Çıkış nedeni henüz bilinmeyen yangın, bitişiğindeki binalara da sıçradı.	['itfaiye', 'ayakkabı', 'Fatih']	11.12.2024	yangın
Cumhurbaşkanı Erdoğan: Suriye istikrara kavuştukça gönüllü ve onurlu geri dönüşler de artacaktır		Erdoğan, Cumhurbaşkanlığı Külliyesi'ndeki Kabine Toplantısı'nın ardından millete seslendi. Haberin Devamı Isparta'nın Keçiborlu ilçesinde eğitim uçuşu sırasında düşen askeri helikopterde şehit olan askerlere Allah'tan rahmet dileyen Erdoğan, şehitlerin ailelerine, sevenlerine, silah arkadaşlarına ve Türk Silahlı Kuvvetlerine başsağlığı diledi. Türkiye Yüzyılı'nı içeride ve dışarıda attıkları adım…	https://image.posta.com.tr/i/posta/75/0x0/675707f1295c2e4afe7c7811.jpg	https://www.posta.com.tr/gundem/cumhurbaskani-erdogan-suriye-istikrara-kavustukca-gonullu-ve-onurlu-geri-donusler-de-artacaktir-2794020	https://www.posta.com.tr/gundem/cumhurbaskani-erdogan-suriye-istikrara-kavustukca-gonullu-ve-onurlu-geri-donusler-de-artacaktir-2794020	https://image.posta.com.tr/i/posta/75/0x0/675707f1295c2e4afe7c7811.jpg	2024-12-09T18:38:00+03:00	Gündem Haberleri - Cumhurbaşkanı Recep Tayyip Erdoğan başkanlığında biraraya gelen Cumhurbaşkanlığı Kabine Toplantısı sona erdi. Cumhurbaşkanı Erdoğan, ana gündem maddesi Suriye ve asgari ücret olan toplantı sonrası açıklamalarda bulundu. Erdoğan, Suriye ihtilafını diyalog yoluyla çözüme çağrılarımız eski rejim tarafından küstahça reddedilmiş, ülkemizin uzattığı elin değeri bilinmemiş, manası anl…	['bakan', 'kabine', 'erdoğan']	9.12.2024	yangın
Narin cinayeti davasında 4 sanık için istenen ceza belli oldu!		Diyarbakır Merkez Bağlar ilçesinin Tavşantepe Mahallesi'nde 21 Ağustos'ta kaybolan ve 8 Eylül'de Eğertutmaz Deresi'nde cansız bedenine ulaşılan Narin Güran'ın öldürülmesine ilişkin tutuklu amca Salim, anne Yüksel ve ağabey Enes Güran ile komşuları Nevzat Bahtiyar "iştirak halinde çocuğa karşı kasten öldürme" suçundan ağırlaştırılmış müebbet hapis istemiyle yargılanıyor. Haberin Devamı Cumhuriyet …	https://image.posta.com.tr/i/posta/75/0x0/6752b428251a02661a3141c0.jpg	https://www.posta.com.tr/gundem/narin-cinayeti-davasinda-4-sanik-icin-istenen-ceza-belli-oldu-2792151	https://www.posta.com.tr/gundem/narin-cinayeti-davasinda-4-sanik-icin-istenen-ceza-belli-oldu-2792151	https://image.posta.com.tr/i/posta/75/0x0/6752b428251a02661a3141c0.jpg	2024-12-06T11:22:00+03:00	Güncel Gündem Haberleri - Narin Güran cinayeti davasında savcı mütalaasını açıkladı. Cumhuriyet savcısı mütalaasında, 4 sanık hakkında iştirak halinde çocuğa karşı kasten öldürme suçundan ağırlaştırılmış müebbet hapis cezası istedi.	['NarinGüran', 'ceza', 'cinayet', 'dava']	6.12.2024	yangın
Huzurevindeki 3 arkadaşını öldüren katilden şaşırtan savunma		Olay, 3 Mayıs'ta Döşemealtı ilçesindeki Antalya Büyükşehir Belediyesi Halil Akyüz Huzurevi'nde meydana geldi. İzzettin Süğüt, kendisiyle aynı huzurevinde kalan, husumet yaşadığı ileri sürülen Selçuk Goncegül, Ali Serdar Batır ve Ahmet Özdemirel'e bıçakla saldırdı. Süğüt saldırı sonrası yangın merdiveninden kaçarken, Selçuk Goncegül ile Ali Serdar Batır olay yerinde, ağır yaralı Ahmet Özdemirel is…	https://image.posta.com.tr/i/posta/75/0x0/675167ddbb62dfa13950dbf3.jpg	https://www.posta.com.tr/gundem/huzurevindeki-3-arkadasini-olduren-katilden-sasirtan-savunma-2791510	https://www.posta.com.tr/gundem/huzurevindeki-3-arkadasini-olduren-katilden-sasirtan-savunma-2791510	https://image.posta.com.tr/i/posta/75/0x0/675167ddbb62dfa13950dbf3.jpg	2024-12-05T11:44:00+03:00	Güncel Gündem Haberleri - Antalya’da huzurevindeki 3 arkadaşını öldürdüğü suçlamasıyla 3 kez ağırlaştırılmış ömür boyu hapis cezası istemiyle yargılanan İzzettin Süğüt, kurum müdürü ile tartıştıktan sonra bıçaklı saldırıyı gerçekleştirdiğini belirterek savunma yaptı.	['antalya', 'huzurevi', 'cinayet']	5.12.2024	yangın
Vefakar babanın görüntüleri tüm Türkiye'nin içini ısıttı: Zor oluyor; ama başka şansım yok		Tüm Türkiye, 4 çocuk babası İbrahim Kale'yi (46) kızı Yağmur Su'nun (10) çektiği görüntülerle tanıdı. Gündelik işlere koşan ve çocuklarının rızkını çıkaran baba İbrahim Kale'nin, akşam işten gelip kıyafetlerini bile çıkarmadan çocuklarına yemek yaptığı görüntüler herkesin takdirini kazandı. Haberin Devamı İzmir'in Konak ilçesinde yaşayan ve demir doğrama işiyle uğraşan İbrahim Kale'nin, 2 evliliğ…	https://image.posta.com.tr/i/posta/75/0x0/67506f9143571b6822c9ea27.jpg	https://www.posta.com.tr/gundem/vefakar-babanin-goruntuleri-tum-turkiyenin-icini-isitti-zor-oluyor-ama-baska-sansim-yok-2791205	https://www.posta.com.tr/gundem/vefakar-babanin-goruntuleri-tum-turkiyenin-icini-isitti-zor-oluyor-ama-baska-sansim-yok-2791205	https://image.posta.com.tr/i/posta/75/0x0/67506f9143571b6822c9ea27.jpg	2024-12-04T18:04:00+03:00	Son Dakika Gündem Haberleri - İzmir'in Konak ilçesinde, işten eve gelen ve üzerine bile değiştirmeden bir başına kaldığı çocuklarına yemek yapan, evi toparlayan vefakar babanın görüntüleri tüm Türkiye'nin içini ısıttı. Baba İbrahim Kale, gözyaşlarına boğularak, “Zor oluyor; ama başka şansım yok. Bazen yevmiyeli bir işe gidiyorum para kazanmak için; çünkü rızkımı çıkarmak zorundayım. Evde öksüz ev…	['izmir', 'baba', 'konak']	4.12.2024	yangın
Bakan Işıkhan'dan 3 işçinin yaşamını yitirdiği yangına ilişkin açıklama		KAYNAK DHA Çalışma ve Sosyal Güvenlik Bakanı Vedat Işıkhan, Kayseri'de bir mobilya fabrikasında çıkan, 3 işçinin yaşamını yitirdiği yangına ilişkin "Yaşanan elim olay nedeniyle Bakanlığımız Müfettiş görevlendirmiştir. Süreci yakından takip ediyoruz" ifadelerini kullandı. Haberin Devamı Haberin Devamı Bakan Işıkhan, Kayseri'nin Melikgazi ilçesindeki mobilya fabrikasında çıkan ve 3 işçinin yaşamını…	https://image.cnnturk.com/i/cnnturk/75/1200x675/674b918da25287b72057d29b.jpg	https://www.cnnturk.com/turkiye/bakan-isikhandan-3-iscinin-yasamini-yitirdigi-yangina-iliskin-aciklama-2194813	https://www.cnnturk.com/turkiye/bakan-isikhandan-3-iscinin-yasamini-yitirdigi-yangina-iliskin-aciklama-2194813	https://image.cnnturk.com/i/cnnturk/75/1200x675/674b918da25287b72057d29b.jpg	2024-12-01T01:28:34+03:00	Son Dakika Türkiye Gündem Haberleri - Çalışma ve Sosyal Güvenlik Bakanı Vedat Işıkhan, Kayseri'de bir mobilya fabrikasında çıkan, 3 işçinin yaşamını yitirdiğ...	['bakan-isikhan', 'yangin', 'kayseri', 'son-haber', 'en-son-haber']	30.11.2024 22:28:34	yangın
​​​​​​Beylikdüzü'nde yangın felaketi! Fabrikadaki alevler yaklaşık 90 saattir sürüyor		KAYNAK AA İstanbul Beylikdüzü'nde, bir fabrikada çıkan yangını söndürme çalışmaları yaklaşık 90 saattir devam ediyor. Haberin Devamı Haberin Devamı Mermerciler Sanayi Sitesi 2. Cadde'de bulunan, plastik ev gereçleri üretilen 6 katlı ve toplam 50 bin metrekarelik fabrikada, 23 Kasım Cumartesi saat 04.00 sıralarında çıkan yangına itfaiye ekiplerinin müdahalesi sürüyor. Çevre ilçelerden de çok sayıd…	https://image.cnnturk.com/i/cnnturk/75/1200x675/674645b2a25287b72057c037.jpg	https://www.cnnturk.com/turkiye/--beylikduzunde-yangin-felaketi-fabrikadaki-alevler-yaklasik-90-saattir-suruyor-2192507	https://www.cnnturk.com/turkiye/--beylikduzunde-yangin-felaketi-fabrikadaki-alevler-yaklasik-90-saattir-suruyor-2192507	https://image.cnnturk.com/i/cnnturk/75/1200x675/674645b2a25287b72057c037.jpg	2024-11-27T01:04:05+03:00	Son Dakika Türkiye Gündem Haberleri - İstanbul Beylikdüzü'nde, bir fabrikada çıkan yangını söndürme çalışmaları yaklaşık 90 saattir devam ediyor....	['beylikduzu', 'fabrika', 'yangin', 'son-haber', 'en-son-haber']	26.11.2024 22:04:05	yangın
Avrasya Tüneli'nde araç yangını - Haberler Son Dakika		Avrasya Tüneli Avrupa Anadolu yönü araç yangını nedeniyle geçici süreyle trafiğe kapatıldı! Haberin Devamı Haberin Devamı İstanbul'da Avrupa yakası ile Anadolu yakasını birbirine bağlayan Avrasya Tüneli'nde bir araçta yangın çıktı. Bölgeye çok sayıda itfaiye ekibi sevk edildi. Yangın nedeniyle tüneldeki ulaşım geçici süreyle trafiğe kapatıldı. TRAFİK YOĞUNLUĞU YÜZDE 83 OLDU Avrasya Tüneli'nin kap…	https://image.cnnturk.com/i/cnnturk/75/1200x675/673f3c0a401b5a3c8687f147.jpg	https://www.cnnturk.com/turkiye/son-dakika-haberi-avrasya-tunelinde-arac-yangini-2189113	https://www.cnnturk.com/turkiye/son-dakika-haberi-avrasya-tunelinde-arac-yangini-2189113	https://image.cnnturk.com/i/cnnturk/75/1200x675/673f3c0a401b5a3c8687f147.jpg	2024-11-21T16:56:00+03:00	Son Dakika Türkiye Gündem Haberleri - Avrasya Tüneli Avrupa Anadolu yönü araç yangını nedeniyle geçici süreyle trafiğe kapatıldı!...	['avrasya-tuneli', 'yangin', 'haber']	21.11.2024 13:56:00	yangın
Balıkesir’deki orman yangını, 15 saat sonra kontrol altında		KAYNAK DHA Bursa Büyükorhan ilçesinde dün çıkan orman yangını, Balıkesir'in Dursunbey ilçesine sıçradı. Dursunbey’de alevler, 15 saat sonra kontrol altına alındı. Bursa’da ise ekiplerin yangına müdahalesi sürüyor. Haberin Devamı Haberin Devamı Bursa'nın Büyükorhan ilçesinde dün saat 14.00 sıralarında çıkan orman yangını, Balıkesir'in Dursunbey ilçesinin kırsal Adaören Mahallesi yakınlarına sıçrad…	https://image.cnnturk.com/i/cnnturk/75/1200x675/672db147fc56d6587096f44d.jpg	https://www.cnnturk.com/turkiye/balikesirdeki-orman-yangini-15-saat-sonra-kontrol-altinda-2180910	https://www.cnnturk.com/turkiye/balikesirdeki-orman-yangini-15-saat-sonra-kontrol-altinda-2180910	https://image.cnnturk.com/i/cnnturk/75/1200x675/672db147fc56d6587096f44d.jpg	2024-11-08T09:36:07+03:00	Son Dakika Türkiye Gündem Haberleri - Bursa Büyükorhan ilçesinde dün çıkan orman yangını, Balıkesir'in Dursunbey ilçesine sıçradı. Dursunbeyde alevler, 15 s...	['balikesir', 'yangin', 'haber', 'haberler']	8.11.2024 06:36:07	yangın
Saniyelerle yarıştılar! Mahsur kalanlar böyle kurtarıldı		KAYNAK DHA Fatih'te 5 katlı binanın giriş katında yangın çıktı. Dairede yükselen dumanlar binayı kısa sürede sardı. İhbar üzerine olay yerine gelen itfaiye ekipleri binada mahsur kalanları kurtardı. Yangında ölen ya da yaralanan olmadı. Haberin Devamı Haberin Devamı Yangın, saat 11.00 sıralarında Fatih Mevlanakapı Mahallesi’nde 5 katlı binanın giriş katında çıktı. Henüz bilinmeyen nedenle çıkan y…	https://image.cnnturk.com/i/cnnturk/75/1200x675/672c9285fc56d6587096f11c.jpg	https://www.cnnturk.com/turkiye/saniyelerle-yaristilar-mahsur-kalanlar-boyle-kurtarildi-2180376	https://www.cnnturk.com/turkiye/saniyelerle-yaristilar-mahsur-kalanlar-boyle-kurtarildi-2180376	https://image.cnnturk.com/i/cnnturk/75/1200x675/672c9285fc56d6587096f11c.jpg	2024-11-07T13:12:49+03:00	Son Dakika Türkiye Gündem Haberleri - Fatih'te 5 katlı binanın giriş katında yangın çıktı. Dairede yükselen dumanlar binayı kısa sürede sardı. İhbar üzerine ...	['fatih', 'haber', 'haberler', 'yangin']	7.11.2024 10:12:49	yangın
Konya'da sobadan çıkan yangın, bitişikteki evlere de sıçradı		KAYNAK DHA Konya'nın Beyşehir ilçesinde büyük bölümü ahşap olan evde sobadan çıkan yangın, bitişiktekilere de sıçradı. Yangında 3 ev tamamen yandı, 4’ünde ise kısmi zarar oluştu. Haberin Devamı Haberin Devamı Beyşehir'in Doğanbey Mahallesi Kale ardı mevkisinde yalnız yaşayan Fettah Sancakoğlu'nun (84) evinde, saat 01.00 sıralarında yangın çıktı. Alevleri gören komşuları Fettah Sancakoğlu'nu evden…	https://image.cnnturk.com/i/cnnturk/75/1200x675/671e3b3b917176d0da28ac70.jpg	https://www.cnnturk.com/turkiye/konyada-sobadan-cikan-yangin-bitisikteki-evlere-de-sicradi-2173827	https://www.cnnturk.com/turkiye/konyada-sobadan-cikan-yangin-bitisikteki-evlere-de-sicradi-2173827	https://image.cnnturk.com/i/cnnturk/75/1200x675/671e3b3b917176d0da28ac70.jpg	2024-10-27T16:08:45+03:00	Son Dakika Türkiye Gündem Haberleri - Konya'nın Beyşehir ilçesinde büyük bölümü ahşap olan evde sobadan çıkan yangın, bitişiktekilere de sıçradı. Yangında 3 ...	['konya', 'yangin', 'haber']	27.10.2024 13:08:45	yangın
İstanbul'da yangın mı çıktı, dumanlar nereden geliyor? İSTANBUL YANGIN SON DAKİKA!		KAYNAK Cnnturk.com İstanbul'da dumanları gören sosyal medya kullanıcıları yangın mı çıktı? sorgulamalarına başladı. Sosyal medyadan paylaşımlara başlayan kullanıcılar dumanların yükseldiği fotoğraf ve videoları paylaşıyor. İstanbul'un birçok noktasından görülen yangına ekiplerin müdahalesi sürüyor. Peki, İstanbul'da yangın mı çıktı, dumanlar nereden geliyor? İşte detaylar. Haberin Devamı Haberin …	https://image.cnnturk.com/i/cnnturk/75/1200x675/67175f29467d622853348dff.jpg	https://www.cnnturk.com/turkiye/istanbulda-yangin-mi-cikti-dumanlar-nereden-geliyor-istanbul-yangin-son-dakika-2171008	https://www.cnnturk.com/turkiye/istanbulda-yangin-mi-cikti-dumanlar-nereden-geliyor-istanbul-yangin-son-dakika-2171008	https://image.cnnturk.com/i/cnnturk/75/1200x675/67175f29467d622853348dff.jpg	2024-10-22T10:57:00+03:00	Son Dakika Türkiye Gündem Haberleri - İstanbul'da dumanları gören sosyal medya kullanıcıları yangın mı çıktı? sorgulamalarına başladı. Sosyal medyadan paylaş...	['istanbul', 'yangin', 'gaziosmanpasa-yangin', 'istanbul-yangin', 'gaziosmanpasa', 'kumas-fabrikasi', 'cnn-canli']	22.10.2024 07:57:00	yangın
SON DAKİKA... İzmir'de orman yangını!		KAYNAK AA İzmir'in Dikili ilçesinde tarım arazisinde çıkan ve ormana sıçrayan yangına havadan ve karadan müdahale ediliyor. Haberin Devamı Haberin Devamı Demirtaş Mahallesi'ndeki tarım arazisinde henüz belirlenemeyen nedenle yangın çıktı. Yangın rüzgarın da etkisiyle ormanlık alana sıçradı. Bölgeye İzmir Orman Bölge Müdürlüğüne ait 4 uçak, 1 helikopter, 14 arazöz, 4 su ikmal aracı, 1 dozer ve 1 y…	https://image.cnnturk.com/i/cnnturk/75/1200x675/6710fc38031ae244b136a03c.jpg	https://www.cnnturk.com/turkiye/son-dakika-izmirde-orman-yangini-2168617	https://www.cnnturk.com/turkiye/son-dakika-izmirde-orman-yangini-2168617	https://image.cnnturk.com/i/cnnturk/75/1200x675/6710fc38031ae244b136a03c.jpg	2024-10-17T15:00:30+03:00	Son Dakika Türkiye Gündem Haberleri - İzmir'in Dikili ilçesinde tarım arazisinde çıkan ve ormana sıçrayan yangına havadan ve karadan müdahale ediliyor....	['izmir', 'yangin', 'haber', 'haberler', 'son-dakika']	17.10.2024 12:00:30	yangın
Yengesini dövdü, babasının evini yaktı! 'Pes' dedirten savunma		KAYNAK İHA Adana'da önce yengesini darp edip, ardından sığındığı babasının evine molotof kokteyli atan kayınbiraderin ifadesinde, "Ben kimseye vurmadım, elim değmiş olabilir" dediği öne sürüldü. Şüpheli şahıs tutuklanarak cezaevine gönderildi. Haberin Devamı Haberin Devamı Olay, 10 Ekim günü Yüreğir ilçesine bağlı Anadolu Mahallesi'nde meydana geldi. İddiaya göre, Fadime Ö. bir süredir eşi Eren Ö…	https://image.cnnturk.com/i/cnnturk/75/1200x675/670a1fd92259de01f71123c8.jpg	https://www.cnnturk.com/turkiye/yengesini-dovdu-babasinin-evini-yakti-pes-dedirten-savunma-2165886	https://www.cnnturk.com/turkiye/yengesini-dovdu-babasinin-evini-yakti-pes-dedirten-savunma-2165886	https://image.cnnturk.com/i/cnnturk/75/1200x675/670a1fd92259de01f71123c8.jpg	2024-10-12T10:06:34+03:00	Son Dakika Türkiye Gündem Haberleri - Adana'da önce yengesini darp edip, ardından sığındığı babasının evine molotof kokteyli atan kayınbiraderin ifadesinde, ...	['haber', 'haberler', 'yangin']	12.10.2024 07:06:34	yangın
Vatandaşlar yanmaktan son anda kurtuldu! İETT otobüsü alev aldı		KAYNAK İHA İstanbul Ataşehir ilçesinde seyir halindeki bir İETT otobüsü alev alev yandı. Olayda ölen veya yaralanan olmazken, İETT otobüsünün içindeki vatandaşlar tahliye edildi. Haberin Devamı Haberin Devamı Olay, Ataşehir ilçesi Barbaros Mahallesi Mor Menekşe Sokak üzerinde saat 17.00 sıralarında yaşandı. İddiaya göre, 34 TP 2892 plakalı İETT otobüs seyir halindeyken motor kısmından dumanlar yü…	https://image.cnnturk.com/i/cnnturk/75/1200x675/670958018b6e504fbf7c9f34.jpg	https://www.cnnturk.com/turkiye/vatandaslar-yanmaktan-son-anda-kurtuldu-iett-otobusu-alev-aldi-2165708	https://www.cnnturk.com/turkiye/vatandaslar-yanmaktan-son-anda-kurtuldu-iett-otobusu-alev-aldi-2165708	https://image.cnnturk.com/i/cnnturk/75/1200x675/670958018b6e504fbf7c9f34.jpg	2024-10-11T19:54:17+03:00	Son Dakika Türkiye Gündem Haberleri - İstanbul Ataşehir ilçesinde seyir halindeki bir İETT otobüsü alev alev yandı. Olayda ölen veya yaralanan olmazken, İETT...	['atasehir', 'iett', 'yangin']	11.10.2024 16:54:17	yangın
Tekirdağ'da kozmetik fabrikasında yangın çıktı! Patlama sesleri yükseldi		KAYNAK AA-İHA Tekirdağ'ın Çerkezköy ilçesinde, kozmetik üretimi yapılan fabrikada yangın çıktı. Yangın sebebi ile yaşanan patlamanın sesleri çevredeki vatandaşları korkuturken alevler 3 saatin ardından kontrol altına alındı. Haberin Devamı Haberin Devamı Tekirdağ'ın Çerkezköy ilçesinde yer alan Yalıboyu Organize Sanayi Bölgesi'ndeki Gorka kozmetik fabrikasında henüz nedeni belirlenemeyen bir sebe…	https://image.cnnturk.com/i/cnnturk/75/1200x675/670853728b6e504fbf7c9c3d.jpg	https://www.cnnturk.com/turkiye/tekirdagda-kozmetik-fabrikasinda-yanin-cikti-patlama-sesleri-yukseldi-2165221	https://www.cnnturk.com/turkiye/tekirdagda-kozmetik-fabrikasinda-yanin-cikti-patlama-sesleri-yukseldi-2165221	https://image.cnnturk.com/i/cnnturk/75/1200x675/670853728b6e504fbf7c9c3d.jpg	2024-10-11T01:23:00+03:00	Son Dakika Türkiye Gündem Haberleri - Tekirdağ'ın Çerkezköy ilçesinde, kozmetik üretimi yapılan fabrikada yangın çıktı. Yangın sebebi ile yaşanan patlamanın ...	['yangin', 'tekirdag', 'kozmetik', 'fabrika']	10.10.2024 22:23:00	yangın
SON DAKİKA... Beylikdüzü'nde fabrikada yangın!		KAYNAK AA Beylikdüzü'nde fabrikada çıkan yangına itfaiye ekiplerince müdahale ediliyor. Haberin Devamı Haberin Devamı Dereboyu Caddesi'ndeki Beysan Sanayi Sitesi'nde sabun ve deterjan gibi temizlik malzemelerinin üretiminin yapıldığı ve ham maddelerin muhafaza edildiği 4 katlı fabrikada henüz belirlenemeyen nedenle yangın çıktı. İhbar üzerine bölgeye çok sayıda itfaiye, sağlık ve polis ekibi sevk…	https://image.cnnturk.com/i/cnnturk/75/1200x675/66f2611b317f470cbd67d4ae.jpg	https://www.cnnturk.com/turkiye/son-dakika-beylikduzunde-fabrikada-yangin-2156212	https://www.cnnturk.com/turkiye/son-dakika-beylikduzunde-fabrikada-yangin-2156212	https://image.cnnturk.com/i/cnnturk/75/1200x675/66f2611b317f470cbd67d4ae.jpg	2024-09-24T09:50:37+03:00	Son Dakika Türkiye Gündem Haberleri - Beylikdüzü'nde fabrikada çıkan yangına itfaiye ekiplerince müdahale ediliyor....	['beylikduzu', 'haber', 'haberler', 'yangin']	24.09.2024 06:50:37	yangın
Sultanbeyli'de korku dolu anlar! 10 kişi tahliye edildi		KAYNAK DHA Sultanbeyli'de bir binanın kapalı otoparkında, motosiklet tamiri sırasında yangın çıktı. Bir kişinin dumandan etkilendiği yangın sırasında, binanın üst katlarında mahsur kalan 5'i çocuk 10 kişi itfaiye ekipleri tarafından tahliye edildi. Haberin Devamı Haberin Devamı Yangın, saat 19.45 sıralarında Adil Mahallesi, Barlas Sokak'ta bulunan 5 katlı binanın kapalı otoparkında meydana geldi.…	https://image.cnnturk.com/i/cnnturk/75/1200x675/66eb3c2c8f123411b2c97e52.jpg	https://www.cnnturk.com/turkiye/sultanbeylide-korku-dolu-anlar-10-kisi-tahliye-edildi-2154503	https://www.cnnturk.com/turkiye/sultanbeylide-korku-dolu-anlar-10-kisi-tahliye-edildi-2154503	https://image.cnnturk.com/i/cnnturk/75/1200x675/66eb3c2c8f123411b2c97e52.jpg	2024-09-18T23:47:55+03:00	Son Dakika Türkiye Gündem Haberleri - Sultanbeyli'de bir binanın kapalı otoparkında, motosiklet tamiri sırasında yangın çıktı. Bir kişinin dumandan etkilendi...	['sultanbeyli', 'adil-mahallesi', 'yangin']	18.09.2024 20:47:55	yangın
SON DAKİKA: Kaş'ta orman yangını		KAYNAK DHA Antalya'nın Kaş ilçesinde orman yangını çıktı. Bölgeye sevk edilen ekipler, yangına müdahale ediyor. Haberin Devamı Haberin Devamı Kaş'ın Çataloluk Mahallesi’ndeki ormanda, öğle saatlerinde yangın çıktı. Alevlere 4 uçak, 2 helikopter, 7 arazöz, 4 ilk müdahale aracı, 1 dozer ve çok sayıda yangın işçisiyle müdahale ediliyor. Ekiplerin yangını söndürme çalışmaları devam ediyor.	https://image.cnnturk.com/i/cnnturk/75/1200x675/66dd84522a36a3daf1462870.jpg	https://www.cnnturk.com/turkiye/son-dakika-kasta-orman-yangini-2150710	https://www.cnnturk.com/turkiye/son-dakika-kasta-orman-yangini-2150710	https://image.cnnturk.com/i/cnnturk/75/1200x675/66dd84522a36a3daf1462870.jpg	2024-09-08T14:02:46+03:00	Son Dakika Türkiye Gündem Haberleri - Antalya'nın Kaş ilçesinde orman yangını çıktı. Bölgeye sevk edilen ekipler, yangına müdahale ediyor....	['haberler', 'haber', 'son-dakika', 'antalya', 'kas', 'yangin']	8.09.2024 11:02:46	yangın
Muğla'da yıldırımlar 50 yerde yangına sebep oldu!		KAYNAK AA Muğla'da, yıldırım isabet eden 50 noktada çıkan orman yangınları söndürüldü. Haberin Devamı Haberin Devamı Orman Bölge Müdürlüğünden yapılan açıklamaya göre, 1-5 Eylül'de Muğla ve ilçelerinde etkili olan gök gürültülü sağanak nedeniyle pek çok noktaya yıldırım düştü. "5 HEKTAR ORMANLIK ALAN ZARAR GÖRDÜ" Yıldırım isabet eden 50 bölgede orman yangını çıktığı kaydedilen açıklamada, "Muğla …	https://image.cnnturk.com/i/cnnturk/75/1200x675/66da0839521297d1f6dccf6f.jpg	https://www.cnnturk.com/turkiye/muglada-yildirimlar-50-yerde-yangina-sebep-oldu-2149885	https://www.cnnturk.com/turkiye/muglada-yildirimlar-50-yerde-yangina-sebep-oldu-2149885	https://image.cnnturk.com/i/cnnturk/75/1200x675/66da0839521297d1f6dccf6f.jpg	2024-09-05T22:36:40+03:00	Son Dakika Türkiye Gündem Haberleri - Muğla'da, yıldırım isabet eden 50 noktada çıkan orman yangınları söndürüldü....	['mugla', 'yangin', 'orman-yangini', 'yildirim']	5.09.2024 19:36:40	yangın
Bağcılar’da tekstil fabrikasında yangın!		KAYNAK İHA İstanbul'un Bağcılar ilçesindeki bir tekstil fabrikasında henüz belirlenemeyen nedenle yangın çıktı. Haberin Devamı Haberin Devamı Bağcılar Yavuz Selim Mahallesi Mehmet Akif Bulvarı üzerinde bulunan bir tekstil fabrikasında yangın çıktı. Olay yerine çok sayıda itfaiye ekipleri sevk edildi. Polis çevre güvenliği alırken, itfaiye söndürme çalışmalarına başladı.	https://image.cnnturk.com/i/cnnturk/75/1200x675/66d0fc06521297d1f6dcbf28.jpg	https://www.cnnturk.com/turkiye/bagcilarda-tekstil-fabrikasinda-yangin-2147309	https://www.cnnturk.com/turkiye/bagcilarda-tekstil-fabrikasinda-yangin-2147309	https://image.cnnturk.com/i/cnnturk/75/1200x675/66d0fc06521297d1f6dcbf28.jpg	2024-08-30T01:56:25+03:00	Son Dakika Türkiye Gündem Haberleri - İstanbul'un Bağcılar ilçesindeki bir tekstil fabrikasında henüz belirlenemeyen nedenle yangın çıktı....	['bagcilar', 'yangin', 'fabrika']	29.08.2024 22:56:25	yangın
Adana'da korkutan yangın: Lüks daire kullanılamaz hale geldi		KAYNAK DHA Adana’da lüks bir sitede, apartmanın 4’üncü katındaki daire, çıkan yangında kullanılamaz hale geldi. Haberin Devamı Haberin Devamı Çukurova ilçesi Huzurevleri Mahallesi’ndeki lüks sitedeki bir blokun 4’üncü katındaki dairede saat 06.00 sıralarında yangın çıktı. Alevleri fark eden dairedekiler dışarı çıkarak itfaiye ve sağlık ekiplerine haber verdi. Ekipler, güvenlik amacıyla binada otu…	https://image.cnnturk.com/i/cnnturk/75/1200x675/66d028d19b4f9a903060f5f8.jpg	https://www.cnnturk.com/turkiye/adanada-korkutan-yangin-luks-daire-kullanilamaz-hale-geldi-2146986	https://www.cnnturk.com/turkiye/adanada-korkutan-yangin-luks-daire-kullanilamaz-hale-geldi-2146986	https://image.cnnturk.com/i/cnnturk/75/1200x675/66d028d19b4f9a903060f5f8.jpg	2024-08-29T10:53:24+03:00	Son Dakika Türkiye Gündem Haberleri - Adanada lüks bir sitede, apartmanın 4üncü katındaki daire, çıkan yangında kullanılamaz hale geldi....	['adana', 'yangin', 'haber', 'haberler']	29.08.2024 07:53:24	yangın
İzmir'de hurda depolama alanında yangın çıktı		KAYNAK AA İzmir'in Aliağa ilçesinde hurda depolama alanında çıkan yangına müdahale ediliyor. Haberin Devamı Haberin Devamı İlçedeki bir hurda depolama alanında henüz belirlenemeyen nedenle yangın çıktı. İhbar üzerine bölgeye sevk edilen İzmir Büyükşehir Belediyesi itfaiyesi ile diğer kurumların araç ve personeli yangına müdahale etti. Yangının çevredeki ormanlık alana sıçrama riskinin bulunmadığı…	https://image.cnnturk.com/i/cnnturk/75/1200x675/66cc46e6521297d1f6dcb091.jpg	https://www.cnnturk.com/turkiye/izmirde-hurda-depolama-alaninda-yangin-cikti-2145573	https://www.cnnturk.com/turkiye/izmirde-hurda-depolama-alaninda-yangin-cikti-2145573	https://image.cnnturk.com/i/cnnturk/75/1200x675/66cc46e6521297d1f6dcb091.jpg	2024-08-26T12:12:37+03:00	Son Dakika Türkiye Gündem Haberleri - İzmir'in Aliağa ilçesinde hurda depolama alanında çıkan yangına müdahale ediliyor....	['izmir', 'yangin', 'haber', 'haberler']	26.08.2024 09:12:37	yangın
Esenyurt’ta bulunan bir sitede korkutan yangın! Ekipler müdahale ediyor		KAYNAK İHA Esenyurt’ta bulunan bir sitedeki dairede yangın çıktı. Bölgeye çok sayıda itfaiye ekibi sevk edilirken, daireden yükselen alevler vatandaşların cep telefonu kamerası ile görüntülendi. Haberin Devamı Haberin Devamı Olay, saat 21.00 sıralarında İstanbul Esenyurt Sultaniye Mahallesi’nde bulunan lüks sitede meydana geldi. Adinilen bilgiye göre, 38 katlı binanın 12. kattaki dairesinde henüz…	https://image.cnnturk.com/i/cnnturk/75/1200x675/66ca32149b4f9a903060e2e1.jpg	https://www.cnnturk.com/turkiye/esenyurtta-bulunan-bir-sitede-korkutan-yangin-ekipler-mudahale-ediyor-2145061	https://www.cnnturk.com/turkiye/esenyurtta-bulunan-bir-sitede-korkutan-yangin-ekipler-mudahale-ediyor-2145061	https://image.cnnturk.com/i/cnnturk/75/1200x675/66ca32149b4f9a903060e2e1.jpg	2024-08-24T21:45:00+03:00	Son Dakika Türkiye Gündem Haberleri - Esenyurtta bulunan bir sitedeki dairede yangın çıktı. Bölgeye çok sayıda itfaiye ekibi sevk edilirken, daireden yüksel...	['son-dakika', 'esenyurt', 'yangin']	24.08.2024 18:45:00	yangın
Kızılcahamam yangıyla ilgili bir kişi tutuklandı		TOKİ 250 bin konut başvurusu ne zaman, nasıl yapılır, şartları neler? TOKİ 250 BİN KONUT BAŞVURUSU 2025 E-DEVLET EKRANI!	https://image.cnnturk.com/i/cnnturk/75/1200x675/66c75c4c2a36a3daf14600c5.jpg	https://www.cnnturk.com/turkiye/kizilcahamam-yangiyla-ilgili-bir-kisi-tutuklandi-2144296	https://www.cnnturk.com/turkiye/kizilcahamam-yangiyla-ilgili-bir-kisi-tutuklandi-2144296	https://image.cnnturk.com/i/cnnturk/75/1200x675/66c75c4c2a36a3daf14600c5.jpg	2024-08-22T18:42:00+03:00	Son Dakika Türkiye Gündem Haberleri - Ankara-Bolu sınırında Kızılcahamam mevkiinde meydana gelen orman yangınıyla ilgili gözaltına alınan 1 şüpheli taksirle ...	['ankara', 'yangin', 'tuutklama', 'kizilcahamam']	22.08.2024 15:42:00	yangın
Muğla'da orman yangını		KAYNAK DHA Muğla'nın Yatağan ilçesinde orman yangını çıktı. Bölgeye sevk edilen ekipler, alevlere havadan ve karadan müdahale ediyor. Haberin Devamı Haberin Devamı Yatağan'ın Turgut Mahallesi'ndeki kızılçam ağaçlarıyla çevrili ormanda, saat 13.30 sıralarında yangın çıktı. Bölgeden yükselen dumanı görenler, 112 Acil Çağrı Merkezi'ne ihbarda bulundu. Çevredekilerin ihbarıyla bölgeye çok sayıda araz…	https://image.cnnturk.com/i/cnnturk/75/1200x675/66c726539b4f9a903060d5e0.jpg	https://www.cnnturk.com/turkiye/muglada-orman-yangini-2144164	https://www.cnnturk.com/turkiye/muglada-orman-yangini-2144164	https://image.cnnturk.com/i/cnnturk/75/1200x675/66c726539b4f9a903060d5e0.jpg	2024-08-22T14:52:00+03:00	Son Dakika Türkiye Gündem Haberleri - Muğla'nın Yatağan ilçesinde orman yangını çıktı. Bölgeye sevk edilen ekipler, alevlere havadan ve karadan müdahale ediy...	['mugla', 'haber', 'haberler', 'yangin']	22.08.2024 11:52:00	yangın
Cumhurbaşkanı Erdoğan, İlham Aliyev ile görüştü		Cumhurbaşkanı Recep Tayyip Erdoğan, Azerbaycan Cumhurbaşkanı İlham Aliyev ile bir telefon görüşmesi gerçekleştirdi. Haberin Devamı Haberin Devamı İletişim Başkanlığı'ndan yapılan açıklamada, Cumhurbaşkanı Erdoğan'ın, Azerbaycan Cumhurbaşkanı Aliyev ile görüştüğü bildirildi. Görüşmede Türkiye ile Azerbaycan ikili ilişkileri, bölgesel ve küresel gelişmeler ele alındı. ALİYEV YANGIN SÖNDÜRME UÇAĞI G…	https://image.cnnturk.com/i/cnnturk/75/1200x675/66c0d11c9b4f9a903060cd46.jpg	https://www.cnnturk.com/turkiye/cumhurbaskani-erdogan-ilham-aliyev-ile-gorustu-2142188	https://www.cnnturk.com/turkiye/cumhurbaskani-erdogan-ilham-aliyev-ile-gorustu-2142188	https://image.cnnturk.com/i/cnnturk/75/1200x675/66c0d11c9b4f9a903060cd46.jpg	2024-08-17T19:34:00+03:00	Son Dakika Türkiye Gündem Haberleri - Cumhurbaşkanı Recep Tayyip Erdoğan, Azerbaycan Cumhurbaşkanı İlham Aliyev ile bir telefon görüşmesi gerçekleştirdi....	['cumhurbaskani-erdogan', 'ilham-aliyev', 'yangin', 'turkiye', 'azerbaycan']	17.08.2024 16:34:00	yangın
Alevlerin arasından kurtulan çift yaşadıklarını anlattı: Canımızı zor kurtardık		KAYNAK AA Aydın'daki orman yangınında alevlerin sıçramasıyla evini ve hayvanlarını kaybeden Turgay Arslan, "Canımızı zor kurtardık. Çocuklarımı kurtardım geri döneyim dedim salmadılar. Kepçeyle yangına girerek annemi ve eşimi kurtardım." dedi. Haberin Devamı Haberin Devamı Aydın'ın Bozdoğan ilçesinde çıkan orman yangınında 2 evi ve ahırları yanan, bazı hayvanları da telef olan çift, yaşadıklarını…	https://image.cnnturk.com/i/cnnturk/75/1200x675/66c0c9849b4f9a903060cd1a.jpg	https://www.cnnturk.com/turkiye/alevlerin-arasindan-kurtulan-cift-yasadiklarini-anlatti-canimizi-zor-kurtardik-2142181	https://www.cnnturk.com/turkiye/alevlerin-arasindan-kurtulan-cift-yasadiklarini-anlatti-canimizi-zor-kurtardik-2142181	https://image.cnnturk.com/i/cnnturk/75/1200x675/66c0c9849b4f9a903060cd1a.jpg	2024-08-17T19:02:16+03:00	Son Dakika Türkiye Gündem Haberleri - Aydın'daki orman yangınında alevlerin sıçramasıyla evini ve hayvanlarını kaybeden Turgay Arslan, Canımızı zor kurtardık...	['aydin', 'bozdogan', 'yangin']	17.08.2024 16:02:16	yangın
Antalya'da kağıt fabrikası yandı		Antalya'da kağıt fabrikasında çıkan yangın, itfaiyenin yaklaşık 2 saatlik müdahalesiyle kontrol altına alındı. 4 bin metrekare üzerine kurulu fabrikada büyük çapta zarar oluştu. Haberin Devamı Haberin Devamı Aksu ilçesi Atatürk Mahallesi'ndeki 4 dönüm üzerine kurulu kağıt fabrikasında saat 06.00 sıralarında yangın çıktı. Alevleri görenler, durumu 112 Acil Çağrı Merkezi'ne bildirdi. İhbarla adrese…	https://image.cnnturk.com/i/cnnturk/75/1200x675/66c07252e22720552ef5d865.jpg	https://www.cnnturk.com/turkiye/antalyada-kagit-fabrikasi-yandi-2142062	https://www.cnnturk.com/turkiye/antalyada-kagit-fabrikasi-yandi-2142062	https://image.cnnturk.com/i/cnnturk/75/1200x675/66c07252e22720552ef5d865.jpg	2024-08-17T12:50:23+03:00	Son Dakika Türkiye Gündem Haberleri - Antalya'da kağıt fabrikasında çıkan yangın, itfaiyenin yaklaşık 2 saatlik müdahalesiyle kontrol altına alındı. 4 bin me...	['antalya', 'yangin', 'haber', 'haberler']	17.08.2024 09:50:23	yangın
SON DAKİKA... Antalya'da kağıt fabrikasında yangın!		KAYNAK AA Antalya'nın Aksu ilçesinde kağıt fabrikasında çıkan yangın kontrol altına alındı. Haberin Devamı Haberin Devamı Atatürk Mahallesi'nde kağıt üretimi yapılan fabrikada yangın çıktı. İhbar üzerine bölgeye çok sayıda itfaiye, polis, ve sağlık ekibi sevk edildi. Fabrika araç ve yaya girişine kapatıldı, vatandaşlar tedbir amaçlı bölgeden uzaklaştırıldı. Ekipler, yangının çevredeki evlere sıçr…	https://image.cnnturk.com/i/cnnturk/75/1200x675/66c03fdfe22720552ef5d7ab.jpg	https://www.cnnturk.com/turkiye/son-dakika-antalyada-kagit-fabrikasinda-yangin-2141942	https://www.cnnturk.com/turkiye/son-dakika-antalyada-kagit-fabrikasinda-yangin-2141942	https://image.cnnturk.com/i/cnnturk/75/1200x675/66c03fdfe22720552ef5d7ab.jpg	2024-08-17T09:15:00+03:00	Son Dakika Türkiye Gündem Haberleri - Antalya'nın Aksu ilçesinde kağıt fabrikasında çıkan yangın kontrol altına alındı....	['haber', 'haberler', 'antalya', 'yangin']	17.08.2024 06:15:00	yangın
Ciğerlerimiz yanıyor! İzmir'de orman yangını		KAYNAK İHA İzmir'in Karşıyaka ilçesi Yamanlar Dağı'nda çıkan orman yangınına müdahale sürüyor. Haberin Devamı Haberin Devamı Yangın, saat 21.39 sıralarında Yamanlar Dağı'nda meydana geldi. Henüz belirlenemeyen sebepten dolayı çıkan orman yangını ihbarı üzerine adrese İzmir Orman Bölge Müdürlüğüne bağlı; 25 arazöz, 4 su ikmal aracı, 3 dozer ve 6 yer ekibi sevk edildi. Ekiplerin alevlerle mücadeles…	https://image.cnnturk.com/i/cnnturk/75/1200x675/66bbd6432a36a3daf145e066.jpg	https://www.cnnturk.com/turkiye/cigerlerimiz-yaniyor-izmirde-orman-yangini-2140511	https://www.cnnturk.com/turkiye/cigerlerimiz-yaniyor-izmirde-orman-yangini-2140511	https://image.cnnturk.com/i/cnnturk/75/1200x675/66bbd6432a36a3daf145e066.jpg	2024-08-14T00:55:42+03:00	Son Dakika Türkiye Gündem Haberleri - İzmir'in Karşıyaka ilçesi Yamanlar Dağı'nda çıkan orman yangınına müdahale sürüyor....	['izmir', 'karsiyaka', 'yangin', 'orman-yangini']	13.08.2024 21:55:42	yangın
Evde çıkan yangın, ormana sıçradı; 35 dekar alan zarar gördü		KAYNAK DHA Çankırı'nın Bayramören ilçesinde evde çıkıp ormana sıçrayan yangında 35 dekar alan zarar gördü. Haberin Devamı Haberin Devamı Çankırı Valiliği'nden yapılan yazılı açıklamada, önceki gün akşam saatlerinde Bayramören ilçesine bağlı Kavakköy köyünün Karabük Mahallesi'ndeki bir evde yangın çıktığı belirtilerek, "Evde meydana gelen yangının ormanlık alana sıçraması ile yangın büyümüş, arazi…	https://image.cnnturk.com/i/cnnturk/75/1200x675/66ab6ff04b3bdc90978c3b25.jpg	https://www.cnnturk.com/turkiye/evde-cikan-yangin-ormana-sicradi-35-dekar-alan-zarar-gordu-2136645	https://www.cnnturk.com/turkiye/evde-cikan-yangin-ormana-sicradi-35-dekar-alan-zarar-gordu-2136645	https://image.cnnturk.com/i/cnnturk/75/1200x675/66ab6ff04b3bdc90978c3b25.jpg	2024-08-01T14:22:41+03:00	Son Dakika Türkiye Gündem Haberleri - Çankırı'nın Bayramören ilçesinde evde çıkıp ormana sıçrayan yangında 35 dekar alan zarar gördü....	['yangin', 'haber', 'haberler']	1.08.2024 11:22:41	yangın
Tuzla'da yat imalathanesinde çıkan yangın söndürüldü		KAYNAK DHA Tuzla'da yat imalathanesinde yangın çıktı. Çok sayıda itfaiye ekibinin müdahale ettiği yangın yaklaşık 1 saatlik çalışma sonucu söndürüldü. Yangında ölen ya da yaralanan olmazken, işyerinde büyük çapta hasar meydana geldi. Haberin Devamı Haberin Devamı Yangın saat 10.40 sıralarında Aydıntepe Mahallesi Sahil Bulvarı'nda bulunan yat imalathanesinde çıktı. Nedeni henüz belli olmayan yangı…	https://image.cnnturk.com/i/cnnturk/75/1200x675/66a763362a36a3daf145acf3.jpg	https://www.cnnturk.com/turkiye/tuzlada-yat-imalathanesinde-cikan-yangin-sonduruldu-2135698	https://www.cnnturk.com/turkiye/tuzlada-yat-imalathanesinde-cikan-yangin-sonduruldu-2135698	https://image.cnnturk.com/i/cnnturk/75/1200x675/66a763362a36a3daf145acf3.jpg	2024-07-29T12:39:58+03:00	Son Dakika Türkiye Gündem Haberleri - Tuzla'da yat imalathanesinde yangın çıktı. Çok sayıda itfaiye ekibinin müdahale ettiği yangın yaklaşık 1 saatlik çalışm...	['tuzla', 'haber', 'haberler', 'yangin']	29.07.2024 09:39:58	yangın
İçişleri bakanlığı’ndan uyarı: 6 ilde turuncu yağış alarmı!		Meteorolojik veriler ışığında, İzmir, Manisa, Muğla, Antalya, Aydın ve Isparta illerinde şiddetli yağış bekleniyor. İçişleri Bakanlığı, afet ve acil durumlara karşı hazırlıklı olmak adına, 7 bin 749 personel ve 3 bin 118 araçla bu illerdeki tüm kriz senaryolarına müdahale için hazır olduklarını duyurdu. Ayrıca, 600 motopomp ve 334 dalgıç pompa da görevde. EĞİTİME ARA VERİLDİ Antalya'da, 24 Aralık…	https://iasbh.tmgrup.com.tr/26f5b3/1200/675/0/0/864/486?u=https://isbh.tmgrup.com.tr/sbh/2024/12/24/icisleri-bakanligindan-uyari-6-ilde-turuncu-yagis-alarmi-1735020171991.jpg	https://www.sabah.com.tr/yasam/icisleri-bakanligindan-uyari-6-ilde-turuncu-yagis-alarmi-7205129	https://www.sabah.com.tr/yasam/icisleri-bakanligindan-uyari-6-ilde-turuncu-yagis-alarmi-7205129	https://iasbh.tmgrup.com.tr/26f5b3/1200/675/0/0/864/486?u=https://isbh.tmgrup.com.tr/sbh/2024/12/24/icisleri-bakanligindan-uyari-6-ilde-turuncu-yagis-alarmi-1735020171991.jpg	2024-12-24T08:47:51+03:00	İçişleri Bakanlığı, İzmir, Manisa, Muğla, Antalya, Aydın ve Isparta illerinde yaşayan vatandaşları olası sel ve taşkın risklerine karşı uyardı. Meteoroloji Genel Müdürlüğü tarafından yapılan son değerlendirmeye göre, bugün bu illerde turuncu uyarı verildi. Meteorolojik veriler ışığında, İzmir,...	['İçişleri Bakanlığı', 'Meteoroloji Genel Müdürlüğü']	24.12.2024	sel
“Komiser Selim” diyerek yaşlı kadının dolandırdı		Adana'da 69 yaşındaki G.A. adlı kadını cep telefonunu arayan A.E. (40), "Ben komiser Selim, kimliğiniz, FETÖ'nün eline geçti. Evdeki altınları, gönderdiğim kişiye verin. Paranız devlet güvencesinde" dedi. Yaşlı kadını korkutan dolandırıcı, G.A.'dan yaklaşık 700 bin lira değerinde altın ve döviz aldı. Tüm birikimini şüphelilere verdikten sonra dolandırıldığını anlayan yaşlı kadın G.A. soluğu polis…	https://iasbh.tmgrup.com.tr/434973/1200/675/0/31/1200/705?u=https://isbh.tmgrup.com.tr/sbh/2024/12/23/komiser-selim-diyerek-yasli-kadinin-dolandirdi-1734938599741.jpg	https://www.sabah.com.tr/yasam/komiser-selim-diyerek-yasli-kadinin-dolandirdi-7204048	https://www.sabah.com.tr/yasam/komiser-selim-diyerek-yasli-kadinin-dolandirdi-7204048	https://iasbh.tmgrup.com.tr/434973/1200/675/0/31/1200/705?u=https://isbh.tmgrup.com.tr/sbh/2024/12/23/komiser-selim-diyerek-yasli-kadinin-dolandirdi-1734938599741.jpg	2024-12-23T10:23:22+03:00	Adana’da kendisini polis olarak tanıtan şüpheli, telefonla aradığı yaşlı kadını FETÖ’yle korkutarak 700 bin lira değerindeki altın ve dövizlerini aldı. Dolandırıcının yurtdışında bulunduğunu tespit eden polis, altınları kadından alan çocuğu, altınları bozduran dolandırıcının eşini ve kuyumcuyu...	['Adana']	23.12.2024	sel
Yok böyle dolandırıcılık: Merhaba ben komiser Selim!		Merkez Seyhan ilçesi Denizli Mahallesi'nde yaşayan G.A.'yı cep telefonuyla arayan kişi, kendini 'Komiser Selim' olarak tanıtarak, "Kimliğiniz FETÖ şüphelilerinin eline geçti. Evinizdeki para ve altınları size göndereceğimiz arkadaşımıza verin. Paranız devlet güvencesinde olacak. Operasyon bittikten sonra teslim edeceğiz" dedi. Bunun üzerine G.A., eve gelen İ.D.'ye 700 bin lira değerindeki 2 bilez…	https://iasbh.tmgrup.com.tr/90ed29/1200/675/0/0/1024/575?u=https://isbh.tmgrup.com.tr/sbh/2024/12/23/yok-boyle-dolandiricilik-merhaba-ben-komiser-selim-1734939125024.jpg	https://www.sabah.com.tr/yasam/yok-boyle-dolandiricilik-merhaba-ben-komiser-selim-7204075	https://www.sabah.com.tr/yasam/yok-boyle-dolandiricilik-merhaba-ben-komiser-selim-7204075	https://iasbh.tmgrup.com.tr/90ed29/1200/675/0/0/1024/575?u=https://isbh.tmgrup.com.tr/sbh/2024/12/23/yok-boyle-dolandiricilik-merhaba-ben-komiser-selim-1734939125024.jpg	2024-12-23T10:32:09+03:00	Olay Adana'da yaşandı. Telefonda ‘Komiser Selim’ olarak kendini tanıtan ve adının FETÖ soruşturmasına karıştığını söyleyen kişiye inanan G.A. (69) adlı kadın, 700 bin lira dolandırıldı. G.A.’nın döviz ve altınlarını teslim ettiği İ.D. (16) ile olaya karışan G.E. (38) ve altınları alan kuyumcu A.D....	['Adana', 'Merkez Seyhan ilçesi', 'Asayiş Şube Müdürlüğü']	23.12.2024	sel
SON DAKİKA HAVA DURUMU HABERLERİ: Çok kuvvetli geliyor! 30 il için uyarı...		Ege ve Göller Yöresi'nde bugün beklenen kuvvetli yağış ile yurdun büyük bölümünde etkili olacak kuvvetli lodos nedeniyle 30 il için 'turuncu' ve 'sarı' kodlu uyarı yapıldı. Haberin Devamı Meteoroloji Genel Müdürlüğü tarafından yapılan son tahminlere göre: Ülke genelinin parçalı ve çok bulutlu, Marmara, Ege, Akdeniz, İç Anadolu’nun batısı, Batı Karadeniz, Doğu Karadeniz'in iç kesimleri, Doğu Anado…	https://image.milimaj.com/i/milliyet/75/0x0/676a390f0e175e36031ec9f3.jpg	https://www.milliyet.com.tr/gundem/son-dakika-cok-kuvvetli-geliyor-antalyada-egitime-ara-verildi-30-il-icin-uyari-yapildi-7265755	https://www.milliyet.com.tr/gundem/son-dakika-cok-kuvvetli-geliyor-antalyada-egitime-ara-verildi-30-il-icin-uyari-yapildi-7265755	https://image.milimaj.com/i/milliyet/75/0x0/676a390f0e175e36031ec9f3.jpg	2024-12-24T07:37:00+03:00	Meteoroloji Genel Müdürlüğü, başta İzmir ve Antalya olmak üzere 6 kenti turuncu kodla uyardı. Antalya'da bugün eğitime ara verilirken İçişleri Bakanlığı da bu şehirlerde önlemler alındığına dair bir paylaşımda bulundu. Öte yandan 24 ile de sarı kodlu uyarı verildi. İşte İstanbul, Ankara, İzmir gibi kentlerde beklenen hava durumu tahminleri...	['hava durumu', 'antalya', 'meteoroloji', 'icisleri bakanligi']	24.12.2024	sel
Meteoroloji uyarmıştı! Antalya'da eğitime 1 gün ara verildi		Antalya Valisi Hulusi Şahin, turuncu kod ile uyarılan Antalya ve ilçelerinde taşımalı eğitime 1 gün ara verildiğini açıkladı. Haberin Devamı Meteoroloji Bölge Müdürlüğü'nden gelen turuncu kodlu sağanak yağış uyarısı üzerine AFAD İl Müdürlüğü Afet Yönetim Merkezinde Antalya Valisi Hulusi Şahin başkanlığında yağışlarla ilgili İl Koordinasyon Kurulu Toplantısı gerçekleştirildi. Toplantı sonrası açık…	https://image.milimaj.com/i/milliyet/75/0x0/67698e9b784fa370e2d2bb88.jpg	https://www.milliyet.com.tr/gundem/meteoroloji-uyarmisti-antalyada-egitime-1-gun-ara-verildi-7265509	https://www.milliyet.com.tr/gundem/meteoroloji-uyarmisti-antalyada-egitime-1-gun-ara-verildi-7265509	https://image.milimaj.com/i/milliyet/75/0x0/67698e9b784fa370e2d2bb88.jpg	2024-12-23T19:23:00+03:00	Antalya'da turuncu kodlu alarm verilmişti. Antalya Valisi Hulusi Şahin, olumsuz hava koşulları nedeniyle taşımalı eğitime 1 gün ara verildiğini duyurdu. İşte detaylar...	['hava durumu', 'antalya', 'okullar tatil', 'hulusi sahin', 'kar tatili', 'meteoroloji']	23.12.2024	sel
SON DAKİKA HAVA DURUMU HABERİ: İstanbul, Ankara, İzmir ve diğer illerin hava durumu nasıl olacak?		Afet ve Acil Durum Yönetimi Başkanlığı (AFAD), sosyal medya hesabından yapılan açıklamada, Meteoroloji Genel Müdürlüğü'nden alınan son bilgi ve yapılan değerlendirmelere göre; 24 Aralık Salı günü sabah saatlerinden itibaren Antalya'nın batı ve merkez ilçelerinde, öğle saatlerinden itibaren doğu ilçelerinde genellikle çok kuvvetli ve şiddetli; Kaş, Demre, Finike, Aksu, Serik, İbradı, Manavgat ve A…	https://image.milimaj.com/i/milliyet/75/0x0/676968b0784fa370e2d2bae7.jpg	https://www.milliyet.com.tr/gundem/son-dakika-meteoroloji-saat-verdi-30-kentte-alarm-cok-kuvvetli-geliyor-7265412	https://www.milliyet.com.tr/gundem/son-dakika-meteoroloji-saat-verdi-30-kentte-alarm-cok-kuvvetli-geliyor-7265412	https://image.milimaj.com/i/milliyet/75/0x0/676968b0784fa370e2d2bae7.jpg	2024-12-23T16:42:00+03:00	Son dakika hava durumu haberlerine göre, Meteoroloji saat verdi! 30 kentte alarm: Çok kuvvetli geliyor	['meteoroloji', 'afad', 'saganak', 'kar', 'hava durumu', 'istanbuil', 'ankara', 'istanbul hava durumu', 'ankara hava durumu', 'izmir hava durumu']	23.12.2024	sel
SON DAKİKA: Yeni haftada hava nasıl olacak? Meteoroloji yeni haritayı yayımladı! Yarın hariç 1 hafta sürecek soğuk ve kar yağışı geliyor!		Meteoroloji Genel Müdürlüğü tarafından yapılan son tahminlere göre: Yurt genelinin parçalı ve çok bulutlu, Marmara'nın doğusu, Kuzey Ege'nin iç kesimleri, Doğu Akdeniz, İç Anadolu'nun kuzeyi, Karadeniz, Doğu Anadolu'nun kuzey ve batısı ile Güneydoğu Anadolu'nun yağışlı geçeceği tahmin ediliyor. Yağışların, genellikle yağmur ve sağanak, yurdun güney kıyı kesimlerinde yer yer gök gürültülü sağanak,…	https://image.milimaj.com/i/milliyet/75/1200x675/67681c3b784fa370e2d2b479.jpg	https://www.milliyet.com.tr/gundem/son-dakika-meteoroloji-uyardi-1-hafta-surecek-kar-ve-saganak-alarmi-7264731	https://www.milliyet.com.tr/gundem/son-dakika-meteoroloji-uyardi-1-hafta-surecek-kar-ve-saganak-alarmi-7264731	https://image.milimaj.com/i/milliyet/75/1200x675/67681c3b784fa370e2d2b479.jpg	2024-12-22T17:10:00+03:00	Meteoroloji Genel Müdürlüğü yeni haftanın hava durumu raporunu yayımladı. Buna göre Salı günü başlayacak soğuk ve yağışlı hava Doğu Anadolu, Güneydoğu Anadolu ve iç kesimleri etkisi altına alacak. Batı kesimlerde ise kar yağışı etkili olacak.	['meteoroloji', 'saganak', 'kar', 'hava durumu', 'istanbul', 'yeni haftada hava nasil olacak?']	22.12.2024	sel
Sel felaketini yaşayan Manavgat'ta son durum		Manavgat ilçesinde dün saat 13.00’te başlayıp, 18.00’e kadar etkili olan, metrekareye 106 metreküp yağışın düştüğü yağmurda su baskınları yaşandı, birçok mahallede ev ve iş yerleri zarar gördü. 2 kişinin yaralandığı su baskınlarında evleri zarar görenler, geceyi ilçedeki otellerde misafir olarak geçirdi. Haberin Devamı Su baskınları sonrası ilçede sabah erken saatlerde temizlik çalışması başlatıl…	https://image.milimaj.com/i/milliyet/75/0x0/6768094e784fa370e2d2b3fd.jpg	https://www.milliyet.com.tr/gundem/sel-felaketini-yasayan-manavgatta-son-durum-7264675	https://www.milliyet.com.tr/gundem/sel-felaketini-yasayan-manavgatta-son-durum-7264675	https://image.milimaj.com/i/milliyet/75/0x0/6768094e784fa370e2d2b3fd.jpg	2024-12-22T15:43:45+03:00	Antalya’nın Manavgat ilçesinde dün şiddetli yağışın ardından meydana gelen sel felaketinin yaraları sarılmaya başlandı. Zarar gören evlerdeki eşyalar jandarma ve AFAD ekipleri tarafından boşaltıldı, belediye ve AFAD gönülleri temizlik çalışması yaptı.	['antalya', 'sel', 'muhittin bocek', 'saganak', 'afad']	22.12.2024	sel
TBMM Başkanı Numan Kurtulmuş: Türkçe bir zenginliktir		Kurtulmuş, Türk İşbirliği ve Koordinasyon Ajansı Başkanlığı (TİKA) ile Makedonya Türk Sivil Toplum Teşkilatları Birliği (MATÜSİTEB) tarafından Kuzey Makedonya'nın başkenti Üsküp'teki bir otelde düzenlenen "21 Aralık Türkçe Eğitim Bayramı" programında konuştu. Haberin Devamı 21 Aralık'ın, Türk toplumu tarafından Kuzey Makedonya'da Türkçe Eğitim Bayramı olarak kutlanmasının ve bu günün resmi bir gü…	https://image.milimaj.com/i/milliyet/75/0x0/676701d530363706df971729.jpg	https://www.milliyet.com.tr/gundem/tbmm-baskani-numan-kurtulmus-turkce-bir-zenginliktir-7264176	https://www.milliyet.com.tr/gundem/tbmm-baskani-numan-kurtulmus-turkce-bir-zenginliktir-7264176	https://image.milimaj.com/i/milliyet/75/0x0/676701d530363706df971729.jpg	2024-12-21T20:59:41+03:00	TBMM Başkanı Numan Kurtulmuş, Türkiye olarak, Balkan ülkelerinin hiçbiri arasında ayrım gözetmeksizin hepsiyle birlikte iyi ilişkileri geliştirmeyi arzu ediyor, bu istikamette inisiyatif alıyor ve Balkan ülkeleri arasında var olan ihtilafların da karşılıklı müzakereyle, rızayla çözülmesinin en doğru yol olduğuna yürekten inanıyoruz.” dedi.	['tbmm', 'numan kurtulmus', 'uskup']	21.12.2024	sel
Son Dakika Hava Durumu Haberleri: Antalya'daki sel su baskınının ardından Meteoroloji 4 ili daha uyardı!		Meteoroloji Genel Müdürlüğü tarafından yapılan son tahminlere göre: Ülkemiz genelinin parçalı ve çok bulutlu, Marmara'nın güney ve doğusu, Ege, Akdeniz, İç Anadolu, Batı ve Orta Karadeniz, Doğu Karadeniz kıyıları, Doğu Anadolu'nun batısı ve Güneydoğu Anadolu'nun aralıklı yağışlı geçeceği tahmin ediliyor. Güney Ege ve Batı Akdeniz kıyıları, Doğu Akdeniz'in doğusu, Sakarya, Düzce ve Zonguldak çevre…	https://image.milimaj.com/i/milliyet/75/0x0/6766f4a030363706df971713.jpg	https://www.milliyet.com.tr/gundem/antalyada-sel-hayati-olumsuz-etkiledi-236-kisi-mahsur-kaldi-meteoroloji-4-ili-daha-uyardi-7264168	https://www.milliyet.com.tr/gundem/antalyada-sel-hayati-olumsuz-etkiledi-236-kisi-mahsur-kaldi-meteoroloji-4-ili-daha-uyardi-7264168	https://image.milimaj.com/i/milliyet/75/0x0/6766f4a030363706df971713.jpg	2024-12-21T20:02:00+03:00	Son Dakika Haberi: Meteoroloji Genel Müdürlüğü haftalık hava tahmin raporunu yayımladı. Raporda 4 il için sarı kodlu gök gürültülü sağanak yağış uyarısında bulunuldu.	['hava durumu', 'antalya', 'meteoroloji', 'sel', 'saganak', 'firtina', 'pazar gunu hava durumu', '5 gunluk hava durumu tahmini']	22.12.2024	sel
Son dakika hava durumu haberleri: Meteoroloji 17 ile şiddetli yağış uyarısında bulundu! Hangi illere yağmur yağacak?		Gece yarısından sonra batı bölgelerinde yağmur geleceğini ifade eden CNN TÜRK Meteoroloji Danışmanı Prof. Dr. Orhan Şen, 'Bu yağmur Marmara'nın batısı, Ege ve Akdeniz'in batısında gece yarısından sonra başlayacak. Çanakkale, Balıkesir, İzmir, Antalya'da kuvvetli yağışlar olabilir. Bunlara dikkat etmemiz gerekir. Yağmur İstanbul'a yarın sabah gelir, öğlen saatlerinde ise kuvvetli olabilir. Haberin…	https://image.milimaj.com/i/milliyet/75/0x0/676573f00e175e36031eb8d7.jpg	https://www.milliyet.com.tr/gundem/son-dakika-kuvvetli-yagis-icin-saat-verildi-istanbul-izmir-ve-antalya-dahil-17-kente-meteorolojiden-uyari-7263345	https://www.milliyet.com.tr/gundem/son-dakika-kuvvetli-yagis-icin-saat-verildi-istanbul-izmir-ve-antalya-dahil-17-kente-meteorolojiden-uyari-7263345	https://image.milimaj.com/i/milliyet/75/0x0/676573f00e175e36031eb8d7.jpg	2024-12-20T15:55:00+03:00	Son dakika hava durumu haberlerine göre, Meteoroloji 17 ile şiddetli yağış uyarısında bulundu. İstanbul, İzmir, Antalya başta olmak üzere yağışların şiddetli olması bekleniyor.	['hava durumu', 'yagmur', 'meteoroloji', 'saganak', 'orhan sen', 'afad', 'istanbul', 'izmir', 'antalya', 'hava durumu haberleri', 'yagis haberleri', 'meteoroloji haberleri', 'yagmur yagacak mi']	20.12.2024	sel
Ankara'da çok sayıda zincirleme trafik kazası! Meteoroloji'den hafta sonu için yeni uyarı geldi		Meteoroloji Genel Müdürlüğü, haftalık hava durumu raporunu paylaştı. CNN TÜRK Meteoroloji Uzmanı Prof. Dr. Orhan Şen, İstanbul dahil birçok ilde bu geceden itibaren sağanak yağışların olacağını açıkladı. Ayrıca Orhan Şen, yılbaşında kar beklentisini değerlendirdi. Haberin Devamı Meteoroloji Genel Müdürlüğü tarafından yapılan son tahminlere göre: Ülkemiz genelinin parçalı ve çok bulutlu, Marmara'n…	https://image.milimaj.com/i/milliyet/75/1200x675/676534b60e175e36031eb773.jpg	https://www.milliyet.com.tr/gundem/ankarada-cok-sayida-zincirleme-trafik-kazasi-meteorolojiden-hafta-sonu-icin-yeni-uyari-geldi-7263047	https://www.milliyet.com.tr/gundem/ankarada-cok-sayida-zincirleme-trafik-kazasi-meteorolojiden-hafta-sonu-icin-yeni-uyari-geldi-7263047	https://image.milimaj.com/i/milliyet/75/1200x675/676534b60e175e36031eb773.jpg	2024-12-20T11:49:00+03:00	Meteoroloji'den İstanbul dahil birçok il için sağanak yağış uyarısı gelirken, Ankara-Kırıkkale Karayolu'nda da sabah saatlerinde etkili olan sis ve yollardaki buzlanma nedeniyle çok sayıda zincirleme trafik kazası meydana geldi.	['ankara', 'bolu', 'meteoroloji']	20.12.2024	sel
Bakan Kurum: 155 bin konutumuzu teslim ettik		Çevre, Şehircilik ve İklim Değişikliği Bakanı Murat Kurum, Selçuklu Kongre Merkezi'nde düzenlenen İnşaat Mühendisleri Odası Konya Şubesi 70’inci Yıl Gala Programına katıldı. Bakan Kurum, odanın en eski üyelerine plaket verdi. Programa, Vali İbrahim Akın, Büyükşehir Belediye Başkanı Uğur İbrahim Altay, AK Parti Konya Milletvekili Mustafa Hakan Özer, CHP Konya Milletvekili Barış Bektaş, İnşaat Mühe…	https://image.milimaj.com/i/milliyet/75/0x0/6764637b30363706df9709bb.jpg	https://www.milliyet.com.tr/gundem/bakan-kurum-155-bin-konutumuzu-teslim-ettik-7262738	https://www.milliyet.com.tr/gundem/bakan-kurum-155-bin-konutumuzu-teslim-ettik-7262738	https://image.milimaj.com/i/milliyet/75/0x0/6764637b30363706df9709bb.jpg	2024-12-19T21:19:00+03:00	Çevre, Şehircilik ve İklim Değişikliği Bakanı Murat Kurum, 11 ili etkileyen deprem felaketinin ardından yapılan konutlarla ilgili yaptığı açıklamada “Dünyaya parmak ısırtan bu çabamız, çok daha büyük bir hızla devam ediyor. Şu ana kadar 155 bin konutumuzu alnımızın akıyla teslim ettik. İnşallah 10 gün sonra da 200 bininci yuvamızın anahtarlarını kardeşlerimize teslim edeceğiz. Ve inşallah, 2025 y…	['murat kurum', 'toki', 'konut']	19.12.2024	sel
Son dakika meteoroloji uyardı: Pazar gününe dikkat! Kar, sağanak, fırtına, buzlanma...		Meteoroloji Genel Müdürlüğü tarafından yapılan son tahminlere göre: Ülkemiz genelinin parçalı ve çok bulutlu, öğle saatlerinde sonra İzmir, Aydın ve Muğla çevrelerinin yağmur ve sağanak yağışlı geçeceği tahmin ediliyor. Gece ve sabah saatlerinde Marmara ile iç ve doğu kesimlerde pus ve yer yer sis bekleniyor. Haberin Devamı HAVA SICAKLIĞI: Hava sıcaklıklarının mevsim normallerinin civarında seyre…	https://image.milimaj.com/i/milliyet/75/0x0/67645fc830363706df9709a4.jpg	https://www.milliyet.com.tr/gundem/hava-durumu-uyarisi-meteoroloji-pazar-gunune-dikkat-cekti-kar-saganak-firtina-buzlanma-7262704	https://www.milliyet.com.tr/gundem/hava-durumu-uyarisi-meteoroloji-pazar-gunune-dikkat-cekti-kar-saganak-firtina-buzlanma-7262704	https://image.milimaj.com/i/milliyet/75/0x0/67645fc830363706df9709a4.jpg	2024-12-19T21:02:00+03:00	Son dakika hava durumu haberlerine göre meteoroloji Pazar gününe dikkat çekti! Kar, sağanak, fırtına, buzlanma...	['hava durumu', 'meteoroloji', 'kar', 'saganak', 'firtina', 'yagmur', 'sel', 'buzlanma', 'don', '20 aralik hava durumu', 'cuma gunu hava durumu', 'hafta sonu hava durumu', 'google hava durumu', 'google meteoroloji', 'son dakika', 'son dakika hava durumu haberleri']	19.12.2024	sel
Meteoroloji il il sıraladı! 30 şehre sarı ve turuncu alarm.... Sağanak yağış, kar, fırtına... İçişleri Bakanlığı'ndan son dakika uyarısı		Haberin Devamı Meteoroloji Genel Müdürlüğü tarafından yapılan son tahminlere göre: Ülkemiz genelinin parçalı ve çok bulutlu, Marmara, Ege, Akdeniz, İç Anadolu’nun batısı, Batı Karadeniz, Doğu Karadeniz'in iç kesimleri, Doğu Anadolu'nun batısı, Güneydoğu Anadolu (Şanlıurfa dışında) ile Karaman, Erzurum, Muş, Bitlis ve Şırnak çevrelerinin aralıklı yağışlı geçeceği tahmin ediliyor. Yağışların; genel…	https://image.hurimg.com/i/hurriyet/75/0x0/676a4ced290109b4d5592974.jpg	https://www.hurriyet.com.tr/gundem/meteoroloji-il-il-siraladi-30-sehirde-sari-ve-turuncu-alarm-saganak-yagis-kar-firtina-icisleri-bakanligindan-son-dakika-uyarisi-42636051	https://www.hurriyet.com.tr/gundem/meteoroloji-il-il-siraladi-30-sehirde-sari-ve-turuncu-alarm-saganak-yagis-kar-firtina-icisleri-bakanligindan-son-dakika-uyarisi-42636051	https://image.hurimg.com/i/hurriyet/75/0x0/676a4ced290109b4d5592974.jpg	2024-12-24T08:56:02+03:00	Yeni yıla girmeye hazırlanırken doğuda kar yağışları, batıda ise sağanak yağışlar etkili olmaya devam ediyor. Meteoroloji Genel Müdürlüğü, 30 il için sarı ve turuncu kodlu uyarı verdi. İçişleri Bakanlığı'ndan yapılan açıklamada, Vatandaşlarımızdan, Meteoroloji uyarılarını dikkatle takip etmelerini ve özellikle sel...	['Meteoroloji', 'sağanak', 'kar', 'fırtına', 'çığ', 'İçişleri Bakanlığı', 'hava durumu']		sel
Helikopter kazasında hayatını kaybedenler için tören... Gözyaşları sel oldu		Haberin Devamı Helikopterin düşmesi sonucu yaşamını yitiren sorumlu pilot Tamer Gönül, doktor Cengiz Coşkun ve sağlık personeli Selçuk Saykal'ın Antalya'ya getirilen naaşları işlemlerin tamamlanmasının ardından yetkililerce alındı. Türk bayrağına sarılı cenazeler, tören için Antalya Ağız ve Diş Hastanesi yanındaki helikopter acil iniş pistine getirildi. Burada düzenlenen törende, sağlık çalışanla…	https://image.hurimg.com/i/hurriyet/75/0x0/67693180c85f68c65f31ab20.jpg	https://www.hurriyet.com.tr/gundem/helikopter-kazasinda-hayatini-kaybedenler-icin-toren-gozyaslari-sel-oldu-42635361	https://www.hurriyet.com.tr/gundem/helikopter-kazasinda-hayatini-kaybedenler-icin-toren-gozyaslari-sel-oldu-42635361	https://image.hurimg.com/i/hurriyet/75/0x0/67693180c85f68c65f31ab20.jpg	2024-12-23T12:53:41+03:00	Son Dakika Haberler - Muğla'da Eğitim ve Araştırma Hastanesinin binasına çarparak düşen ambulans helikopterde hayatını kaybedenler için Antalya'da tören düzenlendi. Oğlu ATT Selçuk Saykal'ın Türk bayrağına sarılı tabutuna sarılan anne Fadegül Keskin, “Kalk ne olur ölmedim de” diyerek gözyaşı döktü. Bayram Çiçek'in...	['muğla', 'antalya', 'helikopter', 'kaza']		sel
Yılbaşında kar yağacak mı? Orhan Şen il il sıraladı: İstanbul dahil birçok ilde sağanak alarmı		Haberin Devamı Meteoroloji Genel Müdürlüğü tarafından yapılan son tahminlere göre: Ülkemiz genelinin parçalı ve çok bulutlu, Marmara'nın batısı, Ege ile Bursa, Hakkari, Şırnak çevreleri ve Antalya'nın doğu ilçelerinin yağışlı geçeceği tahmin ediliyor. Yağışların sağanak ve gök gürültülü sağanak, Hakkari ve Şırnak çevrelerinde karlakarışık yağmur ve kar şeklinde olmak üzere gece saatlerinden sonra…	https://image.hurimg.com/i/hurriyet/75/0x0/67651e38ec59db53aab507a2.jpg	https://www.hurriyet.com.tr/gundem/yilbasinda-kar-yagacak-mi-orhan-sen-il-il-siraladi-istanbul-dahil-bircok-ilde-saganak-alarmi-42632219	https://www.hurriyet.com.tr/gundem/yilbasinda-kar-yagacak-mi-orhan-sen-il-il-siraladi-istanbul-dahil-bircok-ilde-saganak-alarmi-42632219	https://image.hurimg.com/i/hurriyet/75/0x0/67651e38ec59db53aab507a2.jpg	2024-12-20T10:35:22+03:00	Son Dakika Flaş Haberler - Meteoroloji Genel Müdürlüğü, haftalık hava durumu raporunu paylaştı. CNN TÜRK Meteoroloji Uzmanı Prof. Dr. Orhan Şen, İstanbul dahil birçok ilde bu geceden itibaren sağanak yağışların olacağını açıkladı. Ayrıca Orhan Şen, yılbaşında kar beklentisini değerlendirdi. İşte yurt genelinde...	['Meteoroloji', 'sağanak', 'kar', 'İstanbul']		sel
Bakan Kurum: 2025 yılının sonunda evine girmeyen tek bir depremzede kardeşimiz kalmayacak		Haberin Devamı Çevre, Şehircilik ve İklim Değişikliği Bakanı Murat Kurum, Selçuklu Kongre Merkezi'nde düzenlenen İnşaat Mühendisleri Odası Konya Şubesi 70’inci Yıl Gala Programına katıldı. Bakan Kurum, odanın en eski üyelerine plaket verdi. Programa, Vali İbrahim Akın, Büyükşehir Belediye Başkanı Uğur İbrahim Altay, AK Parti Konya Milletvekili Mustafa Hakan Özer, CHP Konya Milletvekili Barış Bekt…	https://image.hurimg.com/i/hurriyet/75/0x0/67647af94c39255d0d831fe5.jpg	https://www.hurriyet.com.tr/gundem/bakan-kurum-2025-yilinin-sonunda-evine-girmeyen-tek-bir-depremzede-kardesimiz-kalmayacak-42632033	https://www.hurriyet.com.tr/gundem/bakan-kurum-2025-yilinin-sonunda-evine-girmeyen-tek-bir-depremzede-kardesimiz-kalmayacak-42632033	https://image.hurimg.com/i/hurriyet/75/0x0/67647af94c39255d0d831fe5.jpg	2024-12-19T22:58:52+03:00	Son Dakika Haberleri - Çevre, Şehircilik ve İklim Değişikliği Bakanı Murat Kurum, 11 ili etkileyen deprem felaketinin ardından yapılan konutlarla ilgili yaptığı açıklamada “Dünyaya parmak ısırtan bu çabamız, çok daha büyük bir hızla devam ediyor. Şu ana kadar 155 bin konutumuzu alnımızın akıyla teslim ettik....	['Murat Kurum', '6 Şubat depremleri', 'depremzedeler', 'kalıcı konut']		sel
Bartın'da derede boğulan Simay, açık olan borudan kayıp düşmüş		Haberin Devamı Olay, dün saat 17.00 sıralarında Ulus ilçesine bağlı Kumluca beldesi Zafer köyünde meydana geldi. Arkadaşlarıyla birlikte dere kenarında oynayan Simay Bora, taş atmak istediği dereye dengesini kaybedip düştü. Arkadaşları durumu ailesine haber verdi. Kızını derede arayan Dursun Bora, sonuç alamayınca durumu 112 Acil Çağrı Merkezi’ne bildirdi. İhbar üzerine olay yerine sağlık ve jand…	https://image.hurimg.com/i/hurriyet/75/0x0/6761765a974b96905876e19a.jpg	https://www.hurriyet.com.tr/gundem/bartinda-derede-bogulan-simay-acik-olan-borudan-kayip-dusmus-42629265	https://www.hurriyet.com.tr/gundem/bartinda-derede-bogulan-simay-acik-olan-borudan-kayip-dusmus-42629265	https://image.hurimg.com/i/hurriyet/75/0x0/6761765a974b96905876e19a.jpg	2024-12-17T16:03:39+03:00	Son Dakika Haberleri - Bartın'da dün düştüğü derede boğulan Simay Bora’nın (5) cenazesi, gözyaşları arasında toprağa verildi. Simay’ın açık olan 1 metre çapındaki borudan dereye düştüğü belirtildi. Simay’ın babası Dursun Bora, “Çocuğum 2 arkadaşıyla oynadığı sırada, dereye taş attığı sırada 1 metrelik çapındaki su...	['bartın', 'ulus', 'polis']		sel
İstanbul dahil 13 il için sarı kodlu alarm! Yağışlar ne kadar sürecek? Meteoroloji uyardı: Sel, su baskını ve heyelan tehlikesine dikkat		Haberin Devamı Bugün ülke genelinde parçalı ve çok bulutlu hava hakimken İstanbul dahil olmak üzere yurdun batı kesiminde sağanak yağış etkili oluyor. Meteoroloji'den 13 il için sarı kodlu alarm verildi. O iller sırasıyla Aydın, Balıkesir, Bilecik, Bursa, Çanakkale, İstanbul, İzmir, Kocaeli, Manisa, Muğla, Sakarya, Tekirdağ, Yalova oldu. MEGAKENTTE YAĞIŞ NE KADAR SÜRECEK? Meteoroloji Genel Müdürl…	https://image.hurimg.com/i/hurriyet/75/0x0/675e76f41c524a8b51101ad2.jpg	https://www.hurriyet.com.tr/gundem/istanbul-dahil-13-il-icin-sari-kodlu-alarm-meteoroloji-uyardi-sel-su-baskini-ve-heyelan-tehlikesine-dikkat-42626571	https://www.hurriyet.com.tr/gundem/istanbul-dahil-13-il-icin-sari-kodlu-alarm-meteoroloji-uyardi-sel-su-baskini-ve-heyelan-tehlikesine-dikkat-42626571	https://image.hurimg.com/i/hurriyet/75/0x0/675e76f41c524a8b51101ad2.jpg	2024-12-15T09:33:23+03:00	Son Dakika Haberleri İnternet - Meteoroloji Genel Müdürlüğü, güncel hava durumu tahmin raporunu yayımladı. Buna göre 13 il için sarı kodlu alarm verildi. Yapılan açıklamada sel, su baskını, heyelan ve ulaşımda aksamalar gibi olumsuzluklara dikkat çekildi. Meteoroloji'nin İstanbul için yaptığı 5 günlük tahmine göre...	['Hava durumu', 'İstanbul hava durumu', 'Meteoroloji']		sel
Emine Erdoğan: Doğal felaketlerin sayısı rekor seviyeye ulaştı		Haberin Devamı Cumhurbaşkanı Recep Tayyip Erdoğan'ın eşi Emine Erdoğan'ın başkanlığında, Birleşmiş Milletler (BM) Sıfır Atık Yüksek Düzeyli Şahsiyetler Danışma Kurulunun üçüncü resmi toplantısı gerçekleştirildi. Cumhurbaşkanlığı Dolmabahçe Çalışma Ofisi'ndeki programda konuşan Emine Erdoğan, toplantının moderatörlüğünü üstlenen BM-Habitat İcra Direktörü Anaclaudia Rossbach'a teşekkür etti. Toplan…	https://image.hurimg.com/i/hurriyet/75/0x0/675c7378064fd8beedcbf40e.jpg	https://www.hurriyet.com.tr/gundem/emine-erdogan-bm-sifir-atik-yuksek-duzeyli-sahsiyetler-danisma-kurulunun-ucuncu-toplantisina-baskanlik-etti-42625512	https://www.hurriyet.com.tr/gundem/emine-erdogan-bm-sifir-atik-yuksek-duzeyli-sahsiyetler-danisma-kurulunun-ucuncu-toplantisina-baskanlik-etti-42625512	https://image.hurimg.com/i/hurriyet/75/0x0/675c7378064fd8beedcbf40e.jpg	2024-12-13T20:48:44+03:00	Haberler - Cumhurbaşkanı Recep Tayyip Erdoğan'ın eşi Emine Erdoğan, başkanlık ettiği BM Sıfır Atık Yüksek Düzeyli Şahsiyetler Danışma Kurulu'nun üçüncü toplantısında, BM Çevre Programı'nın raporu, Gazze'deki yıkımda ortaya çıkan atıkların temizlenmesinin onlarca yıl alacağını söylüyor. Tahmini 39 milyon ton...	['BM', 'Sıfır atık', 'Emine Erdoğan']		sel
Emine Erdoğan'dan sıfır atık paylaşımı: 2025 rotamızın insanlık adına hayırlı olmasını diliyorum		Haberin Devamı Birleşmiş Milletler (BM) Sıfır Atık Yüksek Düzeyli Şahsiyetler Danışma Kurulunun üçüncü resmi toplantısı, Emine Erdoğan başkanlığında gerçekleştirildi. Cumhurbaşkanlığı Dolmabahçe Çalışma Ofisi'ndeki programda konuşan Erdoğan, toplantının moderatörlüğünü üstlenen BM-Habitat İcra Direktörü Anaclaudia Rossbach'a teşekkür etti. Toplantıların ilkini 1 Kasım 2023'te yaptıklarını anımsat…	https://image.hurimg.com/i/hurriyet/75/0x0/675c320690076a49d9182dc8.jpg	https://www.hurriyet.com.tr/gundem/emine-erdogandan-sifir-atik-paylasimi-2025-rotamizin-insanlik-adina-hayirli-olmasini-diliyorum-42625225	https://www.hurriyet.com.tr/gundem/emine-erdogandan-sifir-atik-paylasimi-2025-rotamizin-insanlik-adina-hayirli-olmasini-diliyorum-42625225	https://image.hurimg.com/i/hurriyet/75/0x0/675c320690076a49d9182dc8.jpg	2024-12-13T16:10:31+03:00	Son Dakika Haberler - Cumhurbaşkanı Erdoğan'ın eşi Emine Erdoğan sosyal medya hesabından yaptığı paylaşımda Birleşmiş Milletler Sıfır Atık Yüksek Düzeyli Şahsiyetler Danışma Kurulumuzun üçüncü resmi toplantısını, İstanbul’da kıymetli üyelerimizin yüz yüze ve çevrimiçi katılımlarıyla gerçekleştirdik. Daha adil bir...	['Emine Erdoğan', 'Sıfır Atık', 'Birleşmiş Milletler']		sel
Şehitlerimizi uğurladık		Haberin Devamı Isparta’nın Keçiborlu ilçesinde Kara Havacılık Okulu’na ait 2 helikopterin önceki gün eğitim uçuşu sırasında havada teması sonrası yaşanan kazada şehit olan Tuğgeneral İsa Baydilli (52), Teğmen Mustafa Atakan Dut (24), Teğmen Tunahan Dağlı (24), Teğmen Ceyhun Kalyoncu (25), Astsubay Kıdemli Çavuş Hüseyin İpek (26) ve Astsubay Çavuş Taha Nergiz’in (24) bayrağa sarılı tabutları, dün …	https://image.hurimg.com/i/hurriyet/75/0x0/6758c1226e7e9ba6d6c2842e.jpg	https://www.hurriyet.com.tr/gundem/sehitlerimizi-ugurladik-42622041	https://www.hurriyet.com.tr/gundem/sehitlerimizi-ugurladik-42622041	https://image.hurimg.com/i/hurriyet/75/0x0/6758c1226e7e9ba6d6c2842e.jpg	2024-12-11T04:29:32+03:00	Son Dakika Haberleri - Eğitim uçuşu yapan helikopterin düşmesiyle şehit olan 6 askerden beşi dün düzenlenen törenlerle gözyaşları içinde toprağa verildi. Tuğgeneral İsa Baydilli ise bugün uğurlanacak...	['Isparta', 'şehit', 'Kara Havacılık Okulu', 'gazetehaberleri']		sel
Meteoroloji saat verdi! Marmara Bölgesi için gök gürültülü sağanak yağış uyarısı		Haberin Devamı Meteoroloji Genel Müdürlüğünden yapılan açıklamaya göre, Marmara Bölgesi genelinde devam eden sağanağın bu gece saatlerinden itibaren Bilecik dışında, çarşamba günü sabah saatlerine kadar yer yer kuvvetli olması bekleniyor. Ani sel, su baskını, yıldırım, kuvvetli rüzgar ve ulaşımda aksamalar gibi olumsuzluklara karşı dikkatli ve tedbirli olunması gerekiyor.	https://image.hurimg.com/i/hurriyet/75/0x0/6756f51b6e7e9ba6d6c2766f.jpg	https://www.hurriyet.com.tr/gundem/meteoroloji-saat-verdi-marmara-bolgesi-icin-gok-gurultulu-saganak-yagis-uyarisi-42620522	https://www.hurriyet.com.tr/gundem/meteoroloji-saat-verdi-marmara-bolgesi-icin-gok-gurultulu-saganak-yagis-uyarisi-42620522	https://image.hurimg.com/i/hurriyet/75/0x0/6756f51b6e7e9ba6d6c2766f.jpg	2024-12-09T16:48:40+03:00	Son Dakika Haberleri - Meteoroloji Genel Müdürlüğü Marmara Bölgesi için gök gürültülü sağanak uyarısında bulunuldu. Sağanağın bu gece saatlerinden itibaren çarşamba günü sabah saatlerine kadar yer yer kuvvetli olması bekleniyor.	['Meteoroloji', 'sağanak yağış', 'gök gürültüsü', 'İstanbul']		sel
İzmir’de 2 kişinin öldüğü elektrik faciasında keşif için kazı yapıldı		Haberin Devamı Konak ilçesi Alsancak semtinde, 12 Temmuz günü sağanak yağışın etkili olduğu günde su birikintisine basan Tıp Fakültesi 5. sınıf öğrencisi Özge Ceren Deniz ve İnanç Öktemay'ın elektrik akımına kapılarak hayatını kaybetmesiyle ilgili 13 kişinin tutuklu bulunduğu, 42 sanıklı davanın, 3 gün sürecek karar duruşmasının ara kararı açıklandı. Tutuklu yargılanan 13 sanıktan 2'si tahliye ed…	https://image.hurimg.com/i/hurriyet/75/0x0/6756c3c2a55eabaa802e0e1c.jpg	https://www.hurriyet.com.tr/gundem/izmirde-2-kisinin-oldugu-elektrik-faciasinda-kesif-icin-kazi-yapildi-42620222	https://www.hurriyet.com.tr/gundem/izmirde-2-kisinin-oldugu-elektrik-faciasinda-kesif-icin-kazi-yapildi-42620222	https://image.hurimg.com/i/hurriyet/75/0x0/6756c3c2a55eabaa802e0e1c.jpg	2024-12-09T13:19:10+03:00	Haberler - İzmir'in Konak ilçesinde sağanak yağış esnasında elektrik akımına kapılan 2 kişinin hayatını kaybetmesine ilişkin davada kararlaştırılan olay yeri bilirkişi incelemesi başladı. Olayın gerçekleştiği yerde mazgalların etrafı kazılarak inceleme yürütülürken, keşif öncesi yurt dışında olması sebebiyle...	['İzmir', 'elektrik akımı', 'Özge Ceren Deniz']		sel
Bodrum'da sel baskını; 11'den fazla evi su bastı		Haberin Devamı Meteoroloji 4'üncü Bölge Müdürlüğü'nün, Muğla ve çevresi için dün kuvvetli sağanak yağmur uyarısının ardından Bodrum'da kuvvetli sağanak, aralıklarla etkili oldu. Yağış nedeniyle Akyarlar Mahallesi Kemer mevkisinde dere taştı, İslamhaneleri-Turgutreis istikametinde yol, trafiğe kapandı. 11'den fazla ev ve iş yerini su basarken, bahçeler sular altında kaldı. Vatandaşlar, sel baskınl…	https://image.hurimg.com/i/hurriyet/75/0x0/6754f8806e7e9ba6d6c26f67.jpg	https://www.hurriyet.com.tr/gundem/bodrumda-sel-baskini-11den-fazla-evi-su-basti-42618949	https://www.hurriyet.com.tr/gundem/bodrumda-sel-baskini-11den-fazla-evi-su-basti-42618949	https://image.hurimg.com/i/hurriyet/75/0x0/6754f8806e7e9ba6d6c26f67.jpg	2024-12-08T04:38:26+03:00	Son Dakika Haberler - Muğla'nın Bodrum ilçesinde, etkili olan kuvvetli sağanak nedeniyle 11'den fazla evi su bastı, bahçeler sular altında kaldı. Bazı yollar araç trafiğine kapanırken, belediyeye ait otomobilde mahsur kalan 2 personel ekipler yardımıyla kurtarıldı.	['Muğla', 'Bodrum', 'sel']		sel
İzmir'de şehit polis memuru Mehmet Tozun'a son veda: Sen o kadar vicdanlıydın ki, cezaevi mahkumuna bile harçlık verirdin		Haberin Devamı Tozun'un (38) Türk bayrağına sarılı naaşı, Seferihisar ilçesindeki evinde helallik alınmasının ardından Fatma Tevfik Uyar Camisi'ne getirildi. Burada ikindi vakti düzenlenen cenaze törenine şehidin ailesi ve yakınlarının yanı sıra İzmir Valisi Süleyman Elban, Ege Ordusu ve Garnizon Komutanı Orgeneral İrfan Özsert, AK Parti İzmir Milletvekili Mahmut Atilla Kaya, Sahil Güvenlik Ege D…	https://image.hurimg.com/i/hurriyet/75/0x0/67530d0ac8198272f9dfd0be.jpg	https://www.hurriyet.com.tr/gundem/izmirde-sehit-polis-memuru-mehmet-tozuna-son-veda-sen-o-kadar-vicdanliydin-ki-cezaevi-mahkumuna-bile-harclik-verirdin-42617767	https://www.hurriyet.com.tr/gundem/izmirde-sehit-polis-memuru-mehmet-tozuna-son-veda-sen-o-kadar-vicdanliydin-ki-cezaevi-mahkumuna-bile-harclik-verirdin-42617767	https://image.hurimg.com/i/hurriyet/75/0x0/67530d0ac8198272f9dfd0be.jpg	2024-12-06T17:42:52+03:00	Son Dakika Haberleri İnternet - İzmir'in Seferihisar ilçesinde 20 Kasım'da silahlı saldırıda yaralanan ve tedavi gördüğü hastanede şehit olan polis memuru Mehmet Tozun'un cenazesi toprağa verildi. Şehidin yakınları cenazede gözyaşları içinde kalırken çocukları da şehit babalarının tabutuna sarıldı.Şehidin yaralanan...	['izmir', 'pois', 'şehit']		sel
Dünya onu Noel Baba olarak biliyor... Antalya'da doğduğu bölgede önemli keşif! Uzman isim açıkladı: Kanıt niteliğinde veriler		Haberin Devamı Antalya'nın Demre ilçesinde dünyada 'Noel Baba' olarak bilinen Aziz Nikolaos'un adını taşıyan kilisedeki kazı çalışmalarında, bölgenin tarihine ışık tutacak tarihi bir keşif yapıldı. Kiliseyi güneyden çevreleyen iki katlı yapının alt katındaki sondaj çalışmalarında bir lahit açığa çıkarıldı. Kilisenin avlusunu güneyden sınırlandıran 2 katlı yapı içinde yürütülen sondaj çalışmaların…	https://image.hurimg.com/i/hurriyet/75/0x0/67529b6fc8198272f9dfccde.jpg	https://www.hurriyet.com.tr/gundem/dunya-onu-noel-baba-olarak-biliyor-antalyada-dogdugu-bolgede-onemli-kesif-uzman-isim-acikladi-gercek-olabilir-42616976	https://www.hurriyet.com.tr/gundem/dunya-onu-noel-baba-olarak-biliyor-antalyada-dogdugu-bolgede-onemli-kesif-uzman-isim-acikladi-gercek-olabilir-42616976	https://image.hurimg.com/i/hurriyet/75/0x0/67529b6fc8198272f9dfccde.jpg	2024-12-06T09:38:04+03:00	Son Dakika Haber - Tüm dünyanın 'Noel Baba' olarak tanıdığı, Antalya Patara'da doğan ve bugünkü Demre'nin kurulu olduğu Myra'da ölen Aziz Nikolaos'un adını taşıyan kilise alanındaki 2 katlı yapı içinde lahit bulundu. Henüz kapak kısmı açığa çıkarılan ve Aziz Nikolaos'a ait olabileceği değerlendirilen lahit heyecan...	['Noel Baba', 'Antalya', 'Patara']		sel
Cumhurbaşkanı Erdoğan: Temiz suya erişim beka meselesi		Haberin Devamı Cumhurbaşkanı Tayyip Erdoğan, Beştepe Millet Kongre ve Kültür Merkezi’nde DSİ Tarafından Yapımı Tamamlanan 564 Tesisin Toplu Açılış Töreni’ne canlı bağlantı yaparak özetle şunları söyledi: “Dünyanın 3’te 2’si suyla kaplı olsa da insanın kullanabileceği miktar son derece kısıtlıdır. Geriye kalan tatlı su miktarının da ancak yüzde 1’lik bölümü kullanılabilir durumdadır. Ulaşılabildiğ…	https://image.hurimg.com/i/hurriyet/75/0x0/674f6d5e5c33a4b506c109e3.jpg	https://www.hurriyet.com.tr/gundem/cumhurbaskani-erdogan-temiz-suya-erisim-beka-meselesi-42614479	https://www.hurriyet.com.tr/gundem/cumhurbaskani-erdogan-temiz-suya-erisim-beka-meselesi-42614479	https://image.hurimg.com/i/hurriyet/75/0x0/674f6d5e5c33a4b506c109e3.jpg	2024-12-04T02:41:07+03:00	Son Dakika Haberler - Baraj, gölet gibi 564 tesisin açılışını yapan Cumhurbaşkanı Tayyip Erdoğan, dünyadaki temiz su kaynaklarının sınırlı olduğuna dikkat çekerek, “Temiz su kaynaklarına erişim, bir beka meselesidir. Pek çok alanda gecikme telafi edilebilir ama su konusunda yaşanacak en ufak bir gecikme, telafisi...	['Cumhurbaşkanı\xa0Erdoğan', 'Beştepe', 'DSİ', 'gazetehaberleri']		sel
Bakan Uraloğlu: Tayland ile ticaret hacmimiz 1,5 milyar doları aştı		Haberin Devamı Tayland Krallığı Milli Günü Ankara’da resepsiyon ile kutlandı. Resepsiyona Ulaştırma ve Altyapı Bakanı Abdulkadir Uraloğlu, Tayland'ın Ankara Büyükelçisi Apirat Sugondhabhirom ve çok sayıda davetli katıldı. Resepsiyon'da konuşan Büyükelçi Sugondhabhirom, “Bu yıl Ankara'da, asıl milli bayramımız olan 5 Aralık'tan iki gün önce Milli Gün resepsiyonuna ev sahipliği yapıyoruz. Biz Tayla…	https://image.hurimg.com/i/hurriyet/75/0x0/674f5d295c33a4b506c10992.jpg	https://www.hurriyet.com.tr/gundem/bakan-uraloglu-tayland-ile-ticaret-hacmimiz-1-5-milyar-dolari-asti-42614436	https://www.hurriyet.com.tr/gundem/bakan-uraloglu-tayland-ile-ticaret-hacmimiz-1-5-milyar-dolari-asti-42614436	https://image.hurimg.com/i/hurriyet/75/0x0/674f5d295c33a4b506c10992.jpg	2024-12-03T22:34:57+03:00	Son Dakika Haberleri İnternet - Tayland Krallığı Milli Günü nedeniyle düzenlenen resepsiyonda konuşan Ulaştırma ve Altyapı Bakanı Abdulkadir Uraloğlu, “Tayland ile 2002 yılında 200 milyon dolar civarında olan ticaret hacmimiz, 2024 yılının ilk 9 ayında 1,5 milyar doları aştı. Ticaretimizin dengeli şekilde...	['Bakan Uraloğlu', 'Abdulkadir Uraloğlu', 'Tayland']		sel
AFAD uyardı! Şiddetli yağış geliyor		AFAD'ın sosyal medya hesabından yapılan paylaşımda, Meteoroloji Genel Müdürlüğü'nden alınan son bilgilere ve yapılan değerlendirmelere yer verilerek, "24 Aralık Salı günü, sabah saatlerinden itibaren batı ve merkez ilçelerinde, öğle saatlerinden itibaren doğu ilçelerinde genellikle çok kuvvetli ve şiddetli; Kaş, Demre, Finike, Aksu, Serik, İbradı, Manavgat ve Alanya ilçelerinde şiddetli yer yer a…	https://image.posta.com.tr/i/posta/75/0x0/67698874295c2e4afe7caacb.jpg	https://www.posta.com.tr/gundem/afad-uyardi-siddetli-yagis-geliyor-2802007	https://www.posta.com.tr/gundem/afad-uyardi-siddetli-yagis-geliyor-2802007	https://image.posta.com.tr/i/posta/75/0x0/67698874295c2e4afe7caacb.jpg	2024-12-23T18:57:42+03:00	Güncel Gündem Haberleri - Afet ve Acil Durum Yönetimi Başkanlığı (AFAD), yurdun çeşitli bölgelerinde meydana gelebilecek muhtemel şiddetli yağışlara karşı vatandaşlara tedbirli olmaları yönünde uyarıda bulundu.	['afad', 'kar', 'yağmur']	23.12.2024	sel
Antalya'da gözyaşları sel oldu! Helikopter kazasında hayatını kaybedenler için tören		Helikopterin düşmesi sonucu yaşamını yitiren sorumlu pilot Tamer Gönül, doktor Cengiz Coşkun ve sağlık personeli Selçuk Saykal'ın Antalya'ya getirilen naaşları işlemlerin tamamlanmasının ardından yetkililerce alındı. Haberin Devamı Türk bayrağına sarılı cenazeler, tören için Antalya Ağız ve Diş Hastanesi yanındaki helikopter acil iniş pistine getirildi. Burada düzenlenen törende, sağlık çalışanla…	https://image.posta.com.tr/i/posta/75/0x0/6769518ebb62dfa139510c50.jpg	https://www.posta.com.tr/gundem/antalyada-gozyaslari-sel-oldu-helikopter-kazasinda-hayatini-kaybedenler-icin-toren-2801867	https://www.posta.com.tr/gundem/antalyada-gozyaslari-sel-oldu-helikopter-kazasinda-hayatini-kaybedenler-icin-toren-2801867	https://image.posta.com.tr/i/posta/75/0x0/6769518ebb62dfa139510c50.jpg	2024-12-23T15:03:00+03:00	Gündem Haberleri - Muğla'da Eğitim ve Araştırma Hastanesinin binasına çarparak düşen ambulans helikopterde hayatını kaybedenler için Antalya'da tören düzenlendi.	['antalya', 'tören', 'helikopter']	23.12.2024	sel
Cumhurbaşkanı Erdoğan: Suriye teröristlerden temizlenecek!		Erdoğan, partisinin Serdivan Spor Salonu'nda düzenlenen Sakarya 8. Olağan İl Kongresi'ne katıldı. Haberin Devamı Buradaki konuşmasına, "Yiğitlerin beşiğisin, istiklalin ışığısın, al bayrağın aşığısın, eğilmez başın Sakarya . Huzur, istikrar adası, sönmeyen ocak sevdası sende. Türkiye sevdası bulunmaz eşin Sakarya . Yiğitler ve şehitler beşiği istiklalimizin ışığı, vatanımızın, milletimizin, devle…	https://image.posta.com.tr/i/posta/75/0x0/675c4541251a02661a3165e6.jpg	https://www.posta.com.tr/gundem/cumhurbaskani-erdogandan-onemli-aciklamalar-2796375	https://www.posta.com.tr/gundem/cumhurbaskani-erdogandan-onemli-aciklamalar-2796375	https://image.posta.com.tr/i/posta/75/0x0/675c4541251a02661a3165e6.jpg	2024-12-13T15:37:00+03:00	Güncel Gündem Haberleri - AK Parti Sakarya 8. Olağan İl Kongresi'nde açıklamalarda bulunan Cumhurbaşkanı Recep Tayyip Erdoğan, 'Suriye'de işimiz ne' diyorlardı, şimdi gördünüz mü?' dedi. 'Suriye'nin diğer kısımlarının terör örgütlerinden temizlenmesi için gerekeni yapacağız.' diyen Erdoğan, 'Burada kalmak isteyenlerin de başımızın üstünde yeri var.' ifadelerini kullandı. Erdoğan, Sakarya'nın ardı…	['Erdoğan', 'AKParti', 'suriye']	13.12.2024	sel
Kar ve yağmur şiddetli geliyor! Meteoroloji uyardı		Meteoroloji Genel Müdürlüğü'nün (MGM) verilerine göre, Marmara, Ege (İzmir ve Manisa hariç), Batı Akdeniz, İç Anadolu'nun batısı ve güneyi ile Mersin, Adana, Kırşehir, Nevşehir ve Kayseri çevrelerinin yağışlı geçeceği tahmin ediliyor. Yağışların; yağmur ve sağanak kıyı kesimlerde yer yer gök gürültülü sağanak, Kütahya, Afyonkarahisar, Eskişehir, Kırşehir, Nevşehir ve Kayseri çevrelerinin yüksekle…	https://image.posta.com.tr/i/posta/75/0x0/674ea873251a02661a31316a.jpg	https://www.posta.com.tr/gundem/kar-ve-yagmur-siddetli-geliyor-meteoroloji-uyardi-2790065	https://www.posta.com.tr/gundem/kar-ve-yagmur-siddetli-geliyor-meteoroloji-uyardi-2790065	https://image.posta.com.tr/i/posta/75/0x0/674ea873251a02661a31316a.jpg	2024-12-03T09:43:57+03:00	Son Dakika Gündem Haberleri - Ülke genelinde etkisini gösteren soğuk havalar yağışları da beraberinde getirdi. Meteoroloji'nin yaptığı son tahminlerde yağış gelen şehirler belli oldu. Değerlendirmelere göre Mersin ve Adana'da yağış; Kütahya, Afyonkarahisar, Eskişehir, Kırşehir, Nevşehir ve Kayseri'de karla karışık yağmur ve kar yağışı; Antalya, Muğla ve Isparta ile Burdur'da ise kuvvetli yağış be…	['Havadurumu', 'Meteoroloji', 'MGM']	3.12.2024	sel
Çevre, Şehircilik ve İklim Değişikliği Bakanı Murat Kurum: İklim Kanunu bu yıl yürürlüğe girecek		Bakan Kurum, TRT'nin bu yıl 8'incisini düzenlediği TRT World Forum 2024'te "Yarını Dönüştürmek: Eko-Rejenerasyonun Gücü" başlıklı oturumun açılış konuşmasını yaptı. Dünyanın yaradılışından bugüne belki de en meşakkatli dönemlerinden birini yaşadığını kaydeden Kurum, bir yanda İsrail eliyle Gazze'de sürdürülen korkunç bir soykırım olduğunu, diğer yanda ise Rusya-Ukrayna Savaşı'nın neden olduğu acı…	https://image.posta.com.tr/i/posta/75/0x0/674a04a443571b6822c9dd35.jpg	https://www.posta.com.tr/gundem/cevre-sehircilik-ve-iklim-degisikligi-bakani-murat-kurum-iklim-kanunu-bu-yil-yururluge-girecek-2788369	https://www.posta.com.tr/gundem/cevre-sehircilik-ve-iklim-degisikligi-bakani-murat-kurum-iklim-kanunu-bu-yil-yururluge-girecek-2788369	https://image.posta.com.tr/i/posta/75/0x0/674a04a443571b6822c9dd35.jpg	2024-11-29T21:15:03+03:00	Gündem Haberleri - Çevre, Şehircilik ve İklim Değişikliği Bakanı Murat Kurum, insanlığın, doğanın yeniden kendisini toparlamasını istiyorsa finansal destek meselesini süratle çözmesi ve herkesin verdiği sözü yerine getirmesi gerektiğini belirterek, Dünyanın kirletilmesinde Türkiye Cumhuriyeti Devleti'nin suçu neredeyse yoktur. dedi.	['BakanKurum', 'İklimKanunu']	29.11.2024	sel
Kar uyarısı! Rize, Artvin ve Ardahan için alarm! Saat verildi		Meteoroloji Genel Müdürlüğünden yapılan açıklamaya göre, Rize, Artvin ve Ardahan çevrelerindeki yağışların, yarın akşam saatlerinden itibaren etkisini arttırarak kıyı kesimlerde kuvvetli yağmur ve sağanak, Rize'nin iç kesimleriyle Artvin ve Ardahan çevrelerinde kuvvetli ve yer yer yoğun kar şeklinde olması bekleniyor. Haberin Devamı Kuvvetli yağışlarla birlikte ulaşımda aksamalar sel, su baskını,…	https://image.posta.com.tr/i/posta/75/0x0/6745bd03251a02661a311853.jpg	https://www.posta.com.tr/gundem/kar-uyarisi-rize-artvin-ve-ardahan-icin-alarm-saat-verildi-2786321	https://www.posta.com.tr/gundem/kar-uyarisi-rize-artvin-ve-ardahan-icin-alarm-saat-verildi-2786321	https://image.posta.com.tr/i/posta/75/0x0/6745bd03251a02661a311853.jpg	2024-11-26T15:20:32+03:00	Son Dakika Gündem Haberleri - Meteoroloji'den 3 kent için son dakika uyarısı geldi. Rize'nin iç kesimleriyle Artvin ve Ardahan çevrelerinde kuvvetli ve yer yer yoğun kar şeklinde olması bekleniyor. Saat verildi. Öte yandan Samsun-Ankara kara yolunun Çorum sınırları içindeki bölümünde ise kar yağışı etkili oluyor.	['Meteoroloji', 'kar', 'yağış']	26.11.2024	sel
Bakan Yumaklı: Devlet destekli tarım sigortaları 2025'i yeniliklerle karşılayacak		Yumaklı, AA muhabirine, gelecek yıl TARSİM kapsamında yapılacak yeniliklere ilişkin bilgi verdi. Tarım sigortalarının, kurulduğu günden bu yana üreticilere destek olmaya devam ettiğini vurgulayan Yumaklı, kuraklık ve sel gibi doğal afetlerin artması karşısında tarımda sürdürülebilirlik sigortanın öneminin daha arttığını söyledi. Haberin Devamı Yumaklı, söz konusu sigortaları sürekli geliştirdikle…	https://image.posta.com.tr/i/posta/75/0x0/6744350343571b6822c9c0d7.jpg	https://www.posta.com.tr/gundem/bakan-yumakli-devlet-destekli-tarim-sigortalari-2025i-yeniliklerle-karsilayacak-2785331	https://www.posta.com.tr/gundem/bakan-yumakli-devlet-destekli-tarim-sigortalari-2025i-yeniliklerle-karsilayacak-2785331	https://image.posta.com.tr/i/posta/75/0x0/6744350343571b6822c9c0d7.jpg	2024-11-25T11:28:11+03:00	Gündem Haberleri - Tarım ve Orman Bakanı İbrahim Yumaklı, Tarım Sigortaları Havuzu (TARSİM) uygulaması kapsamında gelecek yıl için üretim planlamasına konu ürünlerde yüzde 10 prim indirimine gidildiğini belirterek, Sözleşmeli üretimde yüzde 10-15 prim indirimi uygulanacak. Su kısıtı olan ürünlerde ilave yüzde 10 prim indirimi yapıldı. dedi.	['bakanyumaklı', 'sera', 'tarsim']	25.11.2024	sel
Anadolu Otoyolu'nda Bolu kesimi Ankara yönü ulaşıma kapandı! Ulaşıma kar engeli		Dünden bu yana bölgede devam eden kar yağışı otoyoldaki ulaşımı da olumsuz etkiledi. Otoyolun Ankara yönünde yoğun kar yağışı, kayan araçlar ve hasarlı trafik kazaları nedeniyle Abant Kavşağı'ndan itibaren ulaşım durdu. Haberin Devamı Uzun araç kuyruklarının oluştuğu otoyolda, karayolları ve trafik ekiplerinin yolu açma çalışmaları sürüyor. Otoyolun İstanbul istikametini kullanan sürücüler ise yo…	https://image.posta.com.tr/i/posta/75/0x0/6742f5db43571b6822c9beb9.jpg	https://www.posta.com.tr/gundem/anadolu-otoyolunda-bolu-kesimi-ankara-yonu-ulasima-kapandi-ulasima-kar-engeli-2785086	https://www.posta.com.tr/gundem/anadolu-otoyolunda-bolu-kesimi-ankara-yonu-ulasima-kapandi-ulasima-kar-engeli-2785086	https://image.posta.com.tr/i/posta/75/0x0/6742f5db43571b6822c9beb9.jpg	2024-11-24T12:46:07+03:00	Güncel Gündem Haberleri - Bolu'da etkili olan kar yağışı nedeniyle Anadolu Otoyolu Ankara istikametindeki ulaşım, Abant Kavşağı'ndan itibaren ulaşıma kapandı.	['uyarı', 'yolkapandı', 'karyağışı']	24.11.2024	sel
49 ile sarı ve turuncu kodlu uyarı! Kuvvetli yağış, kar ve fırtına		Meteoroloji Genel Müdürlüğü, yurt genelinde 29 ile sarı, 20 ile ise turuncu kodlu uyarı yaptı. Dün sabah saatlerinde İstanbul başta olmak üzere birçok şehirde önce sağanak yağış, ardından kar yağışı etkili olmaya başladı. Gece itibarıyla da birçok ilde kar yağışı etkisini sürdürdü. Yağışların birkaç gün boyunca devam etmesi bekleniyor. Hava sıcaklıklarının batı bölgelerinde 3 ila 5 derece düşmesi…	https://image.posta.com.tr/i/posta/75/0x0/6742bbb243571b6822c9bdf4.jpg	https://www.posta.com.tr/gundem/49-ile-sari-ve-turuncu-kod-kuvvetli-yagis-kar-ve-firtina-2785047	https://www.posta.com.tr/gundem/49-ile-sari-ve-turuncu-kod-kuvvetli-yagis-kar-ve-firtina-2785047	https://image.posta.com.tr/i/posta/75/0x0/6742bbb243571b6822c9bdf4.jpg	2024-11-24T08:37:00+03:00	Son Dakika Gündem Haberleri - Türkiye kar yağışının etkisi altında. Meteoroloji, fırtına, sağanak ve kar yağışı nedeniyle 29 ili sarı 20 ili de turuncu kodla uyardı. Yetkililer, kuvvetli yağışlarla birlikte ulaşımda aksamalar, heyelan, sel, su baskını, yükseklerde buzlanma ve don gibi olumsuzluklara karşı dikkatli ve tedbirli olunması konusunda uyarıda bulundu.	['karyağışı', 'karyağışıuyarısı', 'karyağışıİstanbul', 'İstanbukkar', 'Ankarakaryağışı']	24.11.2024	sel
Kar, kış fena bastıracak! Meteoroloji'den 49 ile uyarı, Türkiye haritası renk değiştirdi		Meteoroloji Genel Müdürlüğü (MGM) tarafından yapılan son değerlendirmelere göre; Türkiye genelinin parçalı ve çok bulutlu, Marmara, Ege, Akdeniz, İç Anadolu, Batı ve Orta Karadeniz, Doğu Anadolu'nun güneybatısı, Güneydoğu Anadolu'nun kuzey ve batısı ile Giresun, Dersim, Bingöl, Muş ve Bitlis çevreleri ile Erzurum ve Erzincan'ın güney kesimlerinin yağmur ve sağanak, Kıyı Ege ile Akdeniz kıyılarını…	https://image.posta.com.tr/i/posta/75/0x0/673ebddc295c2e4afe7c5294.jpg	https://www.posta.com.tr/gundem/kar-kis-fena-bastiracak-meteorolojiden-49-ile-uyari-turkiye-haritasi-renk-degistirdi-2783120	https://www.posta.com.tr/gundem/kar-kis-fena-bastiracak-meteorolojiden-49-ile-uyari-turkiye-haritasi-renk-degistirdi-2783120	https://image.posta.com.tr/i/posta/75/0x0/673ebddc295c2e4afe7c5294.jpg	2024-11-21T07:59:00+03:00	Güncel Gündem Haberleri - Meteoroloji, 21 Kasım hava durumu raporunu yayımladı. Raporda 49 il için sarı kodla uyarı yapılırken; pek çok ilde sağanak bekleniyor. Hava sıcaklıklarının ise Marmara'nın batısında 4 ila 6 derece azalacağı tahmin ediliyor.	['Meteoroloji', 'Havadurumu', 'İstanbulhavadurumu']	21.11.2024	sel
'Aşırı meteorolojik hadiseler peş peşe gelecek' Prof. Dr. Orhan Şen'den sıcaklık uyarısı		Meteoroloji Genel Müdürlüğü, dün yurdun doğusu için yağış uyarısında bulunmuş ve gece saatlerinden itibaren etkili olacağını belirtmişti. Bugün çok sayıda ilde sağanak yağış etkisini gösteriyor. 16 il için sarı kodlu alarm verilirken meteorolojik hadiselere dikkat çekildi. Sarı kodlu alarm verilen iller sırasıyla Adana, Adıyaman, Bingöl, Bitlis, Diyarbakır, Elazığ, Hakkari, Hatay, Malatya, K.Mara…	https://image.posta.com.tr/i/posta/75/0x0/673b328d807fd016d614cb26.jpg	https://www.posta.com.tr/gundem/asiri-meteorolojik-hadiseler-pes-pese-gelecek-prof-dr-orhan-senden-sicaklik-uyarisi-2781513	https://www.posta.com.tr/gundem/asiri-meteorolojik-hadiseler-pes-pese-gelecek-prof-dr-orhan-senden-sicaklik-uyarisi-2781513	https://image.posta.com.tr/i/posta/75/0x0/673b328d807fd016d614cb26.jpg	2024-11-18T15:27:37+03:00	Gündem Haberleri - Meteoroloji Genel Müdürlüğü 16 il için sarı kodlu alarm verdi. Yapılan açıklamada sel, su baskını, buzlanma ve don gibi olumsuzluklara dikkat çekildi. CNN TÜRK Meteoroloji Danışmanı Prof. Dr. Orhan Şen, yeni haftayla ilgili hava durumu tahmini paylaştı. Şen, Bu hafta aşırı meteorolojik olayları art arda göreceğiz. İstanbul'da Perşembe günü lodos ile birlikte şiddetli yağmur gel…	['havasıcaklığı', 'sıcaklık', 'doğuanadolu', 'karyağışı', 'yağmur', 'meteoroloji', 'Meteoroloji']	18.11.2024	sel
İğneada'daki selde yıkılan tesiste 6 kişi can vermişti: Davada karar açıklandı		KAYNAK AA İğneada'daki selde yıkılan tesiste 6 kişinin ölmesine ilişkin davada karar açıklandı. İşletme sahibine 11 yıl 3 ay, 2 sanığa 7 yıl 6'şar ay hapis cezası verildi, bir sanık beraat etti. Haberin Devamı Haberin Devamı Kırklareli'nin Demirköy ilçesine bağlı İğneada beldesinde geçen yıl meydana gelen selde yıkılan ve ruhsatsız işletildiği tespit edilen kamp alanında 6 kişinin hayatını kaybet…	https://image.cnnturk.com/i/cnnturk/75/1200x675/672e51035858777682bef6fe.jpg	https://www.cnnturk.com/turkiye/igneadadaki-selde-yikilan-tesiste-6-kisi-can-vermisti-davada-karar-aciklandi-2181307	https://www.cnnturk.com/turkiye/igneadadaki-selde-yikilan-tesiste-6-kisi-can-vermisti-davada-karar-aciklandi-2181307	https://image.cnnturk.com/i/cnnturk/75/1200x675/672e51035858777682bef6fe.jpg	2024-11-08T20:59:42+03:00	Son Dakika Türkiye Gündem Haberleri - İğneada'daki selde yıkılan tesiste 6 kişinin ölmesine ilişkin davada karar açıklandı. İşletme sahibine 11 yıl 3 ay, 2 s...	['igneada', 'sel', 'dava', 'son-ahber', 'en-son-haber']	8.11.2024 17:59:42	sel
Bir ülke alarma geçti! 50 bin kişi için tahliye emri		KAYNAK AA Japonya'da, meteoroloji uzmanlarının şiddetli yağmurun sele yol açacağı tahmini nedeniyle dört şehirde yaklaşık 50 bin kişiye toplu tahliye emri verildi. Haberin Devamı Haberin Devamı Japonya Meteoroloji Ajansı (JMA), bazı bölgeler için şiddetli yağmura ilişkin "en yüksek seviyede acil durum" uyarısında bulundu. BBC'nin haberine göre, ülkenin ortasındaki dört şehirde beklenen sellerin i…	https://image.cnnturk.com/i/cnnturk/75/1200x675/66ef10b0be6e62e902e6eee6.jpg	https://www.cnnturk.com/dunya/japonya-alarma-gecti-50-bin-kisi-icin-tahliye-emri-2155670	https://www.cnnturk.com/dunya/japonya-alarma-gecti-50-bin-kisi-icin-tahliye-emri-2155670	https://image.cnnturk.com/i/cnnturk/75/1200x675/66ef10b0be6e62e902e6eee6.jpg	2024-09-21T21:30:00+03:00	Son Dakika Dünya Haberleri - Japonya'da, meteoroloji uzmanlarının şiddetli yağmurun sele yol açacağı tahmini nedeniyle dört şehirde yaklaşık 50 bin kişiye to...	['japonya', 'meteoroloji', 'sel', 'Dünya']	21.09.2024 18:30:00	sel
Güney Asya sular altında kaldı: En az 285 ölü		KAYNAK İHA Güney Asya'da son bir ayda yaşanan şiddetli yağışlar nedeniyle meydana gelen sel ve toprak kaymalarına ilişkin resmi verilere göre Vietnam’da en az 233, Tayland'da en az 33 kişi ve Myanmar'da en az 19 kişi hayatını kaybetti. Haberin Devamı Haberin Devamı Güney Asya'da şiddetli geçen muson sezonu ile Yagi Tayfunu nedeniyle yaşanan sel felaketlerinde can kaybı artıyor. Vietnam, Tayland, …	https://image.cnnturk.com/i/cnnturk/75/1200x675/66e44f84db74d9ccc9b72f3d.jpg	https://www.cnnturk.com/dunya/guney-asya-sular-altinda-kaldi-en-az-285-olu-2152706	https://www.cnnturk.com/dunya/guney-asya-sular-altinda-kaldi-en-az-285-olu-2152706	https://image.cnnturk.com/i/cnnturk/75/1200x675/66e44f84db74d9ccc9b72f3d.jpg	2024-09-13T17:43:19+03:00	Son Dakika Dünya Haberleri - Güney Asya'da son bir ayda yaşanan şiddetli yağışlar nedeniyle meydana gelen sel ve toprak kaymalarına ilişkin resmi verilere gö...	['guney-asya', 'sel', 'tayland', 'vietnam', 'Dünya']	13.09.2024 14:43:19	sel
Sudan'daki sellerde ölenlerin sayısı 173'e ulaştı		Sudan Sağlık Bakanlığı, haziran ayından bu yana ülkenin 11 eyaletinde etkili olan sağanaklar nedeniyle oluşan sellerden dolayı hayatını kaybedenlerin sayısının 173'e çıktığını bildirdi. Haberin Devamı Haberin Devamı Bakanlıktan yapılan açıklamada, ülkedeki aşırı yağışlar ve ardından oluşan sellerin 170 binden fazla kişiyi etkilediği belirtildi. Açıklamada, sellerden dolayı yaşamını yitirenlerin s…	https://image.cnnturk.com/i/cnnturk/75/1200x675/66d18b8f9b4f9a903060faaa.jpg	https://www.cnnturk.com/dunya/sudandaki-sellerde-olenlerin-sayisi-173e-ulasti-2147420	https://www.cnnturk.com/dunya/sudandaki-sellerde-olenlerin-sayisi-173e-ulasti-2147420	https://image.cnnturk.com/i/cnnturk/75/1200x675/66d18b8f9b4f9a903060faaa.jpg	2024-08-30T12:07:20+03:00	Son Dakika Dünya Haberleri - Sudan Sağlık Bakanlığı, haziran ayından bu yana ülkenin 11 eyaletinde etkili olan sağanaklar nedeniyle oluşan sellerden dolayı h...	['sudan', 'sel', 'sudan-saglik-bakanligi', 'Dünya']	30.08.2024 09:07:20	sel
Tayland’da sel ve toprak kayması: 22 ölü, 19 yaralı		KAYNAK İHA Tayland’da uzun süredir devam eden muson yağışları nedeniyle birçok şehir sular altında kalırken, yaşanan sel ve toprak kaymalarında 22 kişi hayatını kaybetti, 19 kişi de yaralandı. Haberin Devamı Haberin Devamı Güney Asya’da etkili olan muson yağışları, Tayland’da birçok şehirde hayatı durma noktasına getirdi. Tayland Afet Önleme Departmanı (DDPM) tarafından yapılan açıklamada, 16-25 …	https://image.cnnturk.com/i/cnnturk/75/1200x675/66cc98a0521297d1f6dcb243.jpg	https://www.cnnturk.com/dunya/taylandda-sel-ve-toprak-kaymasi-22-olu-19-yarali-2145786	https://www.cnnturk.com/dunya/taylandda-sel-ve-toprak-kaymasi-22-olu-19-yarali-2145786	https://image.cnnturk.com/i/cnnturk/75/1200x675/66cc98a0521297d1f6dcb243.jpg	2024-08-26T18:00:51+03:00	Son Dakika Dünya Haberleri - Taylandda uzun süredir devam eden muson yağışları nedeniyle birçok şehir sular altında kalırken, yaşanan sel ve toprak kaymalar...	['tayland', 'sel', 'tayland-sel', 'haber', 'son-dakika', 'haberler', 'Dünya']	26.08.2024 15:00:51	sel
Kayseri'de sel sularına kapılmıştı; 15 saat sonra cansız bedeni bulundu		KAYNAK DHA Kayseri'nin Bünyan ilçesinde aracı ile sele kapılıp kaybolan Muhittin Saraç'ın 15 saat sonra, saat 11.30 sıralarında cansız bedeni bulundu. Sele kapıldığı noktaya 7 kilometre mesafede bulunan Saraç'ın cenazesi, otopsisi yapılmak üzere Kayseri Devlet Hastanesi'nin morguna kaldırıldı. Jandarma, olayla ilgili soruşturma başlattı. Haberin Devamı Haberin Devamı Bünyan'da dün etkili olan sağ…	https://image.cnnturk.com/i/cnnturk/75/1200x675/66cb062d521297d1f6dcaa69.jpg	https://www.cnnturk.com/turkiye/kayseride-sel-sularina-kapilmisti-15-saat-sonra-cansiz-bedeni-bulundu-2145241	https://www.cnnturk.com/turkiye/kayseride-sel-sularina-kapilmisti-15-saat-sonra-cansiz-bedeni-bulundu-2145241	https://image.cnnturk.com/i/cnnturk/75/1200x675/66cb062d521297d1f6dcaa69.jpg	2024-08-25T13:23:00+03:00	Son Dakika Türkiye Gündem Haberleri - Kayseri'nin Bünyan ilçesinde aracı ile sele kapılıp kaybolan Muhittin Saraç'ın 15 saat sonra, saat 11.30 sıralarında ca...	['haberler', 'haber', 'son-dakika', 'kayseri', 'sel']	25.08.2024 10:23:00	sel
Kayseri'de sel faciası! 40 kişi kurtarıldı, bir kişi aranıyor		KAYNAK İHA Kayseri'nin Bünyan ilçesinde şiddetli sağanak yağışın etkili olmasının ardından ses yaşandı. Bölgede meydana gelen selde araç ve evlerde mahsur kalan 40 kişi kurtarıldı. Bir kişiyi ise arama çalışmaları devam ediyor. Haberin Devamı Haberin Devamı İlçeye bağlı Güllüce Mahallesi'nde etkili olan sağanak yağış sele dönüştü. Sel sularının vurduğu ilçede geniş çapta maddi hasar meydana gelir…	https://image.cnnturk.com/i/cnnturk/75/1200x675/66ca53d79b4f9a903060e327.jpg	https://www.cnnturk.com/turkiye/kayseride-sel-faciasi-40-kisi-kurtarildi-bir-kisi-araniyor-2145138	https://www.cnnturk.com/turkiye/kayseride-sel-faciasi-40-kisi-kurtarildi-bir-kisi-araniyor-2145138	https://image.cnnturk.com/i/cnnturk/75/1200x675/66ca53d79b4f9a903060e327.jpg	2024-08-25T00:42:52+03:00	Son Dakika Türkiye Gündem Haberleri - Kayseri'nin Bünyan ilçesinde şiddetli sağanak yağışın etkili olmasının ardından ses yaşandı. Bölgede meydana gelen seld...	['kayseri', 'bunyan', 'sel', 'kayip']	24.08.2024 21:42:52	sel
Teksas sular altında kaldı!		KAYNAK CNN TÜRK Meksika'nın körfez kıyılarını Alberto tropikal fırtınası vurdu. Atlantik kasırga mevsiminin ilk fırtınası olan Alberto tropikal fırtınası, Meksika’nın kuzeydoğundaki ABD’nin Teksas eyaletinde şiddetli yağışlara neden oldu. Teksas'ta sokaklar su altında kaldı. Haberin Devamı Haberin Devamı Meksika'nın körfez kıyılarını vuran Alberto tropikal fırtınası nedeniyle ABD’nin Teksas eyale…	https://image.cnnturk.com/i/cnnturk/75/1200x675/66744234660f4d45f02a73a9.jpg	https://www.cnnturk.com/dunya/teksas-sular-altinda-kaldi-2124962	https://www.cnnturk.com/dunya/teksas-sular-altinda-kaldi-2124962	https://image.cnnturk.com/i/cnnturk/75/1200x675/66744234660f4d45f02a73a9.jpg	2024-06-20T18:11:03+03:00	Dünyadan Haberler - Meksika'nın körfez kıyılarını Alberto tropikal fırtınası vurdu. Atlantik kasırga mevsiminin ilk fırtınası olan Alberto tropikal fırtınası...	['meksika', 'alberto-tropikal-firtinasi', 'abd', 'sel', 'firtina', 'Dünya']	20.06.2024 15:11:03	sel
Brezilya'yı sel aldı! 8 ölü, 21 kayıp		KAYNAK İHA Brezilya’nın Rio Grande do Sul eyaletinde etkili olan şiddetli yağışların neden olduğu selde 8 kişi hayatını kaybederken, 21 kişi kayboldu. Çok sayıda araç sel sularına kapıldı. Haberin Devamı Haberin Devamı Brezilya’nın Rio Grande do Sul eyaletinde etkili olan şiddetli yağışlar sele neden oldu. Eyaletteki 100’den fazla şehir şiddetli yağışlardan etkilendi. Yetkililer, sel felaketi ned…	https://image.cnnturk.com/i/cnnturk/75/1200x675/6632c53ceb7c0373b3f41cca.jpg	https://www.cnnturk.com/dunya/brezilyayi-sel-aldi-8-olu-21-kayip-2110702	https://www.cnnturk.com/dunya/brezilyayi-sel-aldi-8-olu-21-kayip-2110702	https://image.cnnturk.com/i/cnnturk/75/1200x675/6632c53ceb7c0373b3f41cca.jpg	2024-05-02T01:42:09+03:00	Dünyadan Haberler - Brezilyanın Rio Grande do Sul eyaletinde etkili olan şiddetli yağışların neden olduğu selde 8 kişi hayatını kaybederken, 21 kişi kaybold...	['brezilya', 'sel', 'kayip', 'Dünya']	1.05.2024 22:42:09	sel
Endonezya'da sel ve toprak kayması: 21 ölü		KAYNAK İHA Endonezya'nın Sumatra adasında şiddetli yağışların neden olduğu sel ve toprak kaymalarında en az 21 kişi hayatını kaybederken, kayıp 6 kişiyi arama çalışmaları sürüyor. Haberin Devamı Haberin Devamı Endonezya'da etkili olan şiddetli yağışların bilançosu netleşmeye başladı. Ulusal Afet Yönetim Ajansı'ndan yapılan açıklamada, Sumatra adasında meydana gelen sel ve toprak kaymalarında en a…	https://image.cnnturk.com/i/cnnturk/75/1200x675/65ed7618bc16ed3f690063cb.jpg	https://www.cnnturk.com/dunya/endonezyada-sel-ve-toprak-kaymasi-21-olu-2093811	https://www.cnnturk.com/dunya/endonezyada-sel-ve-toprak-kaymasi-21-olu-2093811	https://image.cnnturk.com/i/cnnturk/75/1200x675/65ed7618bc16ed3f690063cb.jpg	2024-03-10T11:58:04+03:00	Dünyadan Haberler - Endonezya'nın Sumatra adasında şiddetli yağışların neden olduğu sel ve toprak kaymalarında en az 21 kişi hayatını kaybederken, kayıp 6 ki...	['endonezya', 'endonezya-sel', 'sel', 'Dünya']	10.03.2024 08:58:04	sel
SON DAKİKA: Antalya'da 4 ilçe afet bölgesi ilan edildi		KAYNAK Cnnturk.com İçişleri Bakanı Ali Yerlikaya, aşırı yağış ve fırtına sonrası Antalya'nın Kepez, Muratpaşa, Serik ve Aksu ilçeleri 'Genel Hayata Etkili Afet Bölgesi' ilan edildiğini duyurdu. Haberin Devamı Haberin Devamı Bakan Yerlikaya'nın sosyal medyadan yaptığı paylaşım şöyle: Antalya ilimizde 12-13 Şubat tarihlerinde meydana gelen aşırı yağış ve fırtına sebebiyle sel ve su baskınları yaşan…	https://image.cnnturk.com/i/cnnturk/75/1200x675/65e19f36532d0a621fb37107.jpg	https://www.cnnturk.com/turkiye/son-dakika-antalyada-4-ilce-afet-bolgesi-ilan-edildi-2090335	https://www.cnnturk.com/turkiye/son-dakika-antalyada-4-ilce-afet-bolgesi-ilan-edildi-2090335	https://image.cnnturk.com/i/cnnturk/75/1200x675/65e19f36532d0a621fb37107.jpg	2024-03-01T12:15:00+03:00	Son Dakika Türkiye Gündem Haberleri - İçişleri Bakanı Ali Yerlikaya, aşırı yağış ve fırtına sonrası Antalya'nın Kepez, Muratpaşa, Serik ve Aksu ilçeleri 'Gen...	['haberler', 'haber', 'son-dakika', 'antalya', 'yagmur', 'sel', 'firtina', 'afet', 'kepez', 'muratpasa', 'serik']	1.03.2024 09:15:00	sel
Brezilya'yı vuran selde 11 can kaybı		KAYNAK İHA Brezilya’nın Rio de Janeiro şehrinde hafta sonu etkili olan yağışların yol açtığı sel nedeniyle 11 kişi hayatını kaybederken, kentte olağanüstü hal ilan edildi. Haberin Devamı Haberin Devamı Brezilya’nın Rio de Janeiro şehrini sel vurdu. Hafta sonu etkili olan yağışların yol açtığı sel nedeniyle 11 kişi hayatını kaybetti. İtfaiye ekipleri, aracıyla nehre düşen bir kadını arama çalışmal…	https://image.cnnturk.com/i/cnnturk/75/1200x675/65a5425bae364f0af195807e.jpg	https://www.cnnturk.com/dunya/brezilyayi-vuran-selde-11-can-kaybi-2078871	https://www.cnnturk.com/dunya/brezilyayi-vuran-selde-11-can-kaybi-2078871	https://image.cnnturk.com/i/cnnturk/75/1200x675/65a5425bae364f0af195807e.jpg	2024-01-15T17:34:31+03:00	Son Dakika Dünya Haberleri - Brezilyanın Rio de Janeiro şehrinde hafta sonu etkili olan yağışların yol açtığı sel nedeniyle 11 kişi hayatını kaybederken, k...	['brezilya', 'sel', 'brezilya-sel', 'Dünya']	15.01.2024 14:34:31	sel
Tayland'ı sel vurdu: 6 kişi hayatını kaybetti		KAYNAK İHA Tayland’ın güneyinde etkili olan muson yağışlarının yol açtığı sel felaketi nedeniyle 6 kişi hayatını kaybetti. Haberin Devamı Haberin Devamı Tayland’ın güneyindeki Satun, Songkhla, Pattani, Yala ve Narathiwat eyaletlerinde muson yağışlarının ardından meydana gelen sel felaketi can kaybına yol açtı. Narathiwat Eyalet Vali Yardımcısı Preecha Nualnoi medyaya yaptığı açıklamada, 89 yaşınd…	https://image.cnnturk.com/i/cnnturk/75/1200x675/658c1b32d06f3bf454823058.jpg	https://www.cnnturk.com/dunya/taylandi-sel-vurdu-6-kisi-hayatini-kaybetti-2073965	https://www.cnnturk.com/dunya/taylandi-sel-vurdu-6-kisi-hayatini-kaybetti-2073965	https://image.cnnturk.com/i/cnnturk/75/1200x675/658c1b32d06f3bf454823058.jpg	2023-12-27T15:41:08+03:00	Dünya Haberleri - Taylandın güneyinde etkili olan muson yağışlarının yol açtığı sel felaketi nedeniyle 6 kişi hayatını kaybetti....	['tayland', 'sel', 'sel-felaketi', 'haber', 'Dünya']	27.12.2023 12:41:08	sel
Hindistan’ı vuran selde 5 kişi öldü, araçlar sel sularına kapıldı		KAYNAK İHA Hindistan’ın Tamil Nadu eyaletinde şiddetli yağışların yol açtığı sel felaketinde 5 kişi hayatını kaybetti. Cadde ve sokaklar sular altında kaldı. Haberin Devamı Haberin Devamı Hindistan’ın güneyini 24 saat içinde Michaung Kasırgası'nın vurması beklenirken, Tamil Nadu eyaletinde şiddetli yağışlar sel felaketine neden oldu. Eyaletin başkenti Chennai kentinde polis tarafından yapılan açı…	https://image.cnnturk.com/i/cnnturk/75/1200x675/656de628a468601948b927bd.jpg	https://www.cnnturk.com/dunya/hindistani-vuran-selde-5-kisi-oldu-araclar-sel-sularina-kapildi-2067558	https://www.cnnturk.com/dunya/hindistani-vuran-selde-5-kisi-oldu-araclar-sel-sularina-kapildi-2067558	https://image.cnnturk.com/i/cnnturk/75/1200x675/656de628a468601948b927bd.jpg	2023-12-04T17:46:14+03:00	Dünyadan Haberler - Hindistanın Tamil Nadu eyaletinde şiddetli yağışların yol açtığı sel felaketinde 5 kişi hayatını kaybetti. Cadde ve sokaklar sular altın...	['hindistan', 'sel', 'haber', 'Dünya']	4.12.2023 14:46:14	sel
Son dakika... 2 ilde selden etkilenenlere 5 bin TL yardım		Aile ve Sosyal Hizmetler Bakanı Mahinur Özdemir Göktaş: Batman ve Zonguldak'ta yaşanan sel felaketinden etkilenen vatandaşlarımız için hane başına 5 bin TL yardım yapılacak.� Haberin Devamı Haberin Devamı Aile ve Sosyal Hizmetler Bakanı Mahinur Özdemir Göktaş'ın açıklaması şu şekilde; Batman ve Zonguldak’ta yaşanan sel felaketinden etkilenen hanelerimizin yanındayız. Bu kapsamda, Bakanlık olarak …	https://image.cnnturk.com/i/cnnturk/75/1200x675/6565f601ae0a8f0ec019eaca.jpg	https://www.cnnturk.com/ekonomi/son-dakika-2-ilde-selden-etkilenenlere-5-bin-tl-yardim-2065767	https://www.cnnturk.com/ekonomi/son-dakika-2-ilde-selden-etkilenenlere-5-bin-tl-yardim-2065767	https://image.cnnturk.com/i/cnnturk/75/1200x675/6565f601ae0a8f0ec019eaca.jpg	2023-11-28T17:15:00+03:00	Son Dakika Ekonomi Haberleri - Aile ve Sosyal Hizmetler Bakanı Mahinur Özdemir Göktaş: Batman ve Zonguldak'ta yaşanan sel felaketinden etkilenen vatandaşları...	['haber', 'haberler', 'sel']	28.11.2023 14:15:00	sel
Dominik'te 3 günlük yas: Ülke tarihindeki en şiddetli yağış, 21 can aldı		KAYNAK DHA, İHA Dominik Cumhuriyeti'nde şiddetli yağışların yol açtığı sel felaketinde 3’ü çocuk en az 21 kişi hayatını kaybetti. Yetkililerin açıklamalarında, 2 bin 500'den fazla kişinin kurtarıldığı, bin 600'den fazla evin fırtınadan etkilendiği kaydedildi. Dominik Cumhuriyeti Devlet Başkanı Luis Abinader ise dün fırtına nedeniyle yaşamını yitirenler için 3 günlük ulusal yas ilan ettiklerini du…	https://image.cnnturk.com/i/cnnturk/75/1200x675/655b2366ae0a8f11dc2036fb.jpg	https://www.cnnturk.com/dunya/dominikte-3-gunluk-yas-ulke-tarihindeki-en-siddetli-yagis-21-can-aldi-2063166	https://www.cnnturk.com/dunya/dominikte-3-gunluk-yas-ulke-tarihindeki-en-siddetli-yagis-21-can-aldi-2063166	https://image.cnnturk.com/i/cnnturk/75/1200x675/655b2366ae0a8f11dc2036fb.jpg	2023-11-20T12:15:00+03:00	Son Dakika Dünya Haberleri - Dominik Cumhuriyeti'nde şiddetli yağışların yol açtığı sel felaketinde 3ü çocuk en az 21 kişi hayatını kaybetti. Yetkililerin ...	['dominik', 'dominik-cumhuriyeti', 'sel', 'Dünya']	20.11.2023 09:15:00	sel
Aydın’da sağanak sele neden oldu: 2 ölü, 2 kayıp		KAYNAK DHA Aydın’ın Söke ilçesinde gece saatlerinde etkili olan sağanak nedeniyle dereler taştı, yollar göle döndü. 5 araç sel sularına kapılırken, kaybolan 4 kişiden 2'sinin cansız bedenlerine ulaşıldı. Haberin Devamı Haberin Devamı Kentte gece saatlerinde etkili olan sağanak Söke, Koçarlı, Karpuzlu ve Çine ilçelerinde sele neden oldu. Söke’ye bağlı kırsal Demirçay Mahallesi'nde 5 araç sel sular…	https://image.cnnturk.com/i/cnnturk/75/1200x675/654734dfae0a8f1e687200a1.jpg	https://www.cnnturk.com/turkiye/aydinda-saganak-sele-neden-oldu-2-olu-2-kayip-2058650	https://www.cnnturk.com/turkiye/aydinda-saganak-sele-neden-oldu-2-olu-2-kayip-2058650	https://image.cnnturk.com/i/cnnturk/75/1200x675/654734dfae0a8f1e687200a1.jpg	2023-11-05T09:12:00+03:00	Son Dakika Türkiye Gündem Haberleri - Aydının Söke ilçesinde gece saatlerinde etkili olan sağanak nedeniyle dereler taştı, yollar göle döndü. 5 araç sel sul...	['haberler', 'haber', 'son-dakika', 'aydin', 'saganak', 'sel']	5.11.2023 06:12:00	sel
İstanbul'da sel felaketinden etkilenenlere 5 milyon TL destek		Aile ve Sosyal Hizmetler Bakanı Bakan Mahinur Özdemir Göktaş, İstanbul'da yaşanan sel felaketinden etkilenenlere 5 milyon TL kaynak aktardıklarını açıkladı. Haberin Devamı Haberin Devamı Aile ve Sosyal Hizmetler Bakanı Bakan Mahinur Özdemir Göktaş, önemli açıklamalarda bulundu. Bakan Göktaş, "28 Eylül’de İstanbul’da meydana gelen sel felaketinden etkilenen hanelerin temel ihtiyaçlarının karşılanm…	https://image.cnnturk.com/i/cnnturk/75/1200x675/65202281a468601894a33409.jpg	https://www.cnnturk.com/turkiye/istanbulda-sel-felaketinden-etkilenenlere-5-milyon-tl-destek-2049798	https://www.cnnturk.com/turkiye/istanbulda-sel-felaketinden-etkilenenlere-5-milyon-tl-destek-2049798	https://image.cnnturk.com/i/cnnturk/75/1200x675/65202281a468601894a33409.jpg	2023-10-06T18:06:45+03:00	Son Dakika Türkiye Gündem Haberleri - Aile ve Sosyal Hizmetler Bakanı Bakan Mahinur Özdemir Göktaş, İstanbul'da yaşanan sel felaketinden etkilenenlere 5 mily...	['mahinur-ozdemir-goktas', 'sel', 'yardim']	6.10.2023 15:06:45	sel
Diyarbakır'da eğitime sel engeli		KAYNAK DHA Diyarbakır'da yoğun yağış nedeniyle meydana gelen selden etkilenen 5 okulda eğitime, 6 Ekim'e kadar ara verildi. Kaymakamlık kararı açıkladı. Haberin Devamı Haberin Devamı Kulp ilçesinde etkili olan sağanak, hayatı olumsuz etkiledi. Kırsal Aygün ve Akçesir mahallelerinde yoğun yağış nedeniyle sel meydana geldi. 5 okul selden etkilendi. Kaymakamlık, iki kırsal mahallede eğitime 6 Ekim'e…	https://image.cnnturk.com/i/cnnturk/75/1200x675/651c306ca468601d24e14a7c.jpg	https://www.cnnturk.com/turkiye/diyarbakirda-egitime-sel-engeli-2048812	https://www.cnnturk.com/turkiye/diyarbakirda-egitime-sel-engeli-2048812	https://image.cnnturk.com/i/cnnturk/75/1200x675/651c306ca468601d24e14a7c.jpg	2023-10-03T18:17:02+03:00	Son Dakika Türkiye Gündem Haberleri - Diyarbakır'da yoğun yağış nedeniyle meydana gelen selden etkilenen 5 okulda eğitime, 6 Ekim'e kadar ara verildi. Kaymak...	['diyarbakir', 'sel', 'egitim']	3.10.2023 15:17:02	sel
Bölge bölge, il il seslendi: Bakan Özhaseki'den aşırı yağmur ve su baskını uyarısı		KAYNAK DHA Çevre, Şehircilik ve İklim Değişikliği Bakanı Mehmet Özhaseki, Meteoroloji Genel Müdürlüğü'nün son hava tahmin raporunu paylaşarak, "Yoğun yağışlarla birlikte olumsuz bir durumla karşılaşmamak için yetkililerimizin uyarılarına bütünüyle uyulmasını vatandaşlarımızdan istirham ediyorum" dedi. Haberin Devamı Haberin Devamı Bakan Özhaseki, sosyal medya hesabından yaptığı açıklamada, "Ülkem…	https://image.cnnturk.com/i/cnnturk/75/1200x675/651829e6ae0a8f0b50fa5f1b.jpg	https://www.cnnturk.com/turkiye/bolge-bolge-il-il-seslendi-bakan-ozhasekiden-asiri-yagmur-ve-su-baskini-uyarisi-2047968	https://www.cnnturk.com/turkiye/bolge-bolge-il-il-seslendi-bakan-ozhasekiden-asiri-yagmur-ve-su-baskini-uyarisi-2047968	https://image.cnnturk.com/i/cnnturk/75/1200x675/651829e6ae0a8f0b50fa5f1b.jpg	2023-09-30T17:00:00+03:00	Son Dakika Türkiye Gündem Haberleri - Çevre, Şehircilik ve İklim Değişikliği Bakanı Mehmet Özhaseki, Meteoroloji Genel Müdürlüğü'nün son hava tahmin raporunu...	['ozhaseki', 'yagmur', 'sel']	30.09.2023 14:00:00	sel
Şiddetli sağanak sonucu oluşan su birikintisinde mahsur kaldılar		KAYNAK DHA Düzce'de etkili olan sağanak sebebiyle bir kargo minibüsü su birikintisinde mahsur kaldı. Haberin Devamı Haberin Devamı Düzce'de akşam saatlerinde sağanak etkili oldu. Düzce 1'inci Organize Sanayi Bölgesi 1'inci caddede rögarlar tıkandı ve su birikintisi oluştu. Rıdvan Coşar yönetimindeki 81 BV 314 plakalı kargo minibüsü su birikintisinde mahsur kaldı. ÇEVREDEKİLER YARDIMINA KOŞTU Çevr…	https://image.cnnturk.com/i/cnnturk/75/1200x675/6516f8e2a468600688041eb5.jpg	https://www.cnnturk.com/turkiye/siddetli-saganak-sonucu-olusan-su-birikintisinde-mahsur-kaldilar-2047799	https://www.cnnturk.com/turkiye/siddetli-saganak-sonucu-olusan-su-birikintisinde-mahsur-kaldilar-2047799	https://image.cnnturk.com/i/cnnturk/75/1200x675/6516f8e2a468600688041eb5.jpg	2023-09-29T19:19:08+03:00	Son Dakika Türkiye Gündem Haberleri - Düzce'de etkili olan sağanak sebebiyle bir kargo minibüsü su birikintisinde mahsur kaldı....	['duzce', 'saganak', 'sel']	29.09.2023 16:19:08	sel
Libya'daki sel felaketi sonrası 8 yetkiliye tutuklama		KAYNAK İHA Libya Başsavcısı Sıddık es-Sur, 11 Eylül’de Daniel Fırtınası nedeniyle Derna kentinde çöken 2 barajın yol açtığı sel felaketine ilişkin yürütülen soruşturmada 8 kişinin tutuklanmasını talimatını verdi. Haberin Devamı Haberin Devamı Kuzey Afrika ülkesi Libya’nın doğusunda 11 Eylül’de 2 barajın çökmesiyle meydana gelen sel felaketine ilişkin başlatılan soruşturma sürüyor. Libya Başsavcıs…	https://image.cnnturk.com/i/cnnturk/75/1200x675/651181a0ae0a8f14245f619c.jpg	https://www.cnnturk.com/dunya/libyadaki-sel-felaketi-sonrasi-8-yetkiliye-tutuklama-2046334	https://www.cnnturk.com/dunya/libyadaki-sel-felaketi-sonrasi-8-yetkiliye-tutuklama-2046334	https://image.cnnturk.com/i/cnnturk/75/1200x675/651181a0ae0a8f14245f619c.jpg	2023-09-25T15:48:34+03:00	Son Dakika Dünya Haberleri - Libya Başsavcısı Sıddık es-Sur, 11 Eylülde Daniel Fırtınası nedeniyle Derna kentinde çöken 2 barajın yol açtığı sel felaketine ...	['libya', 'sel-felaketi', 'sel', 'tutuklama', 'Dünya']	25.09.2023 12:48:34	sel
Uluslararası Göç Örgütü: "Libya'daki sel nedeniyle 43 bin 59 kişi yerinden oldu"		KAYNAK İHA Uluslararası Göç Örgütü (IOM), Libya'nın doğusunu vuran selde 43 bin 59 kişinin yerinden olduğunu açıkladı. Haberin Devamı Haberin Devamı Libya'nın doğusunda 10 Eylül'de etkili olan Daniel Fırtınası'nın Derna, Bingazi, Sousse, Al-Marj ve Bayda'da yol açtığı şiddetli yağışın ardından meydana gelen sel felaketinin etkileri sürüyor. Uluslararası Göç Örgütü (IOM) tarafından yapılan açıklam…	https://image.cnnturk.com/i/cnnturk/75/1200x675/650c572dae0a8f15449e4d19.jpg	https://www.cnnturk.com/dunya/uluslararasi-goc-orgutu-libyadaki-sel-nedeniyle-43-bin-59-kisi-yerinden-oldu-2045313	https://www.cnnturk.com/dunya/uluslararasi-goc-orgutu-libyadaki-sel-nedeniyle-43-bin-59-kisi-yerinden-oldu-2045313	https://image.cnnturk.com/i/cnnturk/75/1200x675/650c572dae0a8f15449e4d19.jpg	2023-09-21T17:46:09+03:00	Dünyadan Haberler - Uluslararası Göç Örgütü (IOM), Libya'nın doğusunu vuran selde 43 bin 59 kişinin yerinden olduğunu açıkladı....	['libya', 'sel', 'goc', 'Dünya']	21.09.2023 14:46:09	sel
Sel felaketi öncesi ve sonrası: Derne'deki yıkımın boyutu uydu görüntülerinde!		KAYNAK DHA Rus uzay ajansı Roscosmos, sel felaketinin yaşandığı Libya’nın Derne kentine ait ‘öncesi ve sonrası’ uydu görsellerini paylaştı. Uydu fotoğrafı yıkımın büyüklüğünü ortaya koydu. Haberin Devamı Haberin Devamı Roscosmos açıklamasında şu ifadelere yer verdi; “Kanopus-V uzay aracından alınan görüntü, Libya'nın Derne kentinde meydana gelen feci sel felaketinin sonuçlarını gösteriyor. Akdeni…	https://image.cnnturk.com/i/cnnturk/75/1200x675/650aeaafae0a8f16d812e2c7.jpg	https://www.cnnturk.com/dunya/sel-felaketi-oncesi-ve-sonrasi-dernedeki-yikimin-boyutu-uydu-goruntulerinde-2044918	https://www.cnnturk.com/dunya/sel-felaketi-oncesi-ve-sonrasi-dernedeki-yikimin-boyutu-uydu-goruntulerinde-2044918	https://image.cnnturk.com/i/cnnturk/75/1200x675/650aeaafae0a8f16d812e2c7.jpg	2023-09-20T15:51:19+03:00	Dünya Haberleri - Rus uzay ajansı Roscosmos, sel felaketinin yaşandığı Libyanın Derne kentine ait öncesi ve sonrası uydu görsellerini paylaştı. Uydu fotoğ...	['roscosmos', 'sel', 'libya', 'derne', 'Dünya']	20.09.2023 12:51:19	sel
MSB: TCG SANCAKTAR ve TCG BAYRAKTAR gemileri Libya’ya ulaştı		KAYNAK İHA Milli Savunma Bakanlığı, sel felaketinden etkilenen Libya’ya yardım için yola çıkan TCG SANCAKTAR ve TCG BAYRAKTAR gemileri Libya’ya ulaştığını bildirdi. Haberin Devamı Haberin Devamı Milli Savunma Bakanlığı’nın resmi sosyal medya hesabından, sel felaketinden etkilenen Libya halkına destek için İzmir’den yola çıkan Deniz Kuvvetlerine ait TCG SANCAKTAR ve TCG BAYRAKTAR gemilerinin Libya…	https://image.cnnturk.com/i/cnnturk/75/1200x675/65056b85a468601094a341f4.jpg	https://www.cnnturk.com/dunya/msb-tcg-sancaktar-ve-tcg-bayraktar-gemileri-libyaya-ulasti-2043715	https://www.cnnturk.com/dunya/msb-tcg-sancaktar-ve-tcg-bayraktar-gemileri-libyaya-ulasti-2043715	https://image.cnnturk.com/i/cnnturk/75/1200x675/65056b85a468601094a341f4.jpg	2023-09-16T11:47:03+03:00	Dünya Haberleri - Milli Savunma Bakanlığı, sel felaketinden etkilenen Libyaya yardım için yola çıkan TCG SANCAKTAR ve TCG BAYRAKTAR gemileri Libyaya ulaştı...	['msb', 'tcg-sancaktar', 'tcg-bayraktar', 'gemi', 'libya', 'sel', 'Dünya']	16.09.2023 08:47:03	sel
Libya’dan üst düzey heyet AFAD’a ziyarette bulundu		Esad'ın son günlerinde o detay ortaya çıktı! Yanına sadece iki ismi almış	https://image.cnnturk.com/i/cnnturk/75/1200x675/65047c4bae0a8f0058af7aac.jpg	https://www.cnnturk.com/dunya/libyadan-ust-duzey-heyet-afada-ziyarette-bulundu-2043607	https://www.cnnturk.com/dunya/libyadan-ust-duzey-heyet-afada-ziyarette-bulundu-2043607	https://image.cnnturk.com/i/cnnturk/75/1200x675/65047c4bae0a8f0058af7aac.jpg	2023-09-15T18:46:24+03:00	Dünya Haberleri - Libyada yaşanan sel felaketinin ardından üst düzey heyet AFADa ziyarette bulundu....	['afad', 'libya', 'sel', 'Dünya']	15.09.2023 15:46:24	sel
Libya’daki selde kayıplar artıyor		Danıel Fırtınası’nın şiddetli yağışları nedeniyle Libya’nın doğusunda 10 Eylül’de meydana gelen sel felaketinde can kaybı artıyor. Haberin Devamı Haberin Devamı Libya’nın resmi haber ajansı LANA’nın paylaştığı habere göre, sel felaketinde sadece Derne şehrinde hayatını kaybedenlerin sayısı 6 bine ulaştı, binlerce kişi de kayıp. TOPLU MEZARA DEFİN Felaketten çok etkilenen Derne kentinde hayatını k…	https://image.cnnturk.com/i/cnnturk/75/1200x675/6502a6aea4686022ac9dae91.jpg	https://www.cnnturk.com/dunya/libyadaki-selde-kayiplar-artiyor-2043042	https://www.cnnturk.com/dunya/libyadaki-selde-kayiplar-artiyor-2043042	https://image.cnnturk.com/i/cnnturk/75/1200x675/6502a6aea4686022ac9dae91.jpg	2023-09-14T09:22:51+03:00	Son Dakika Dünya Haberleri - Danıel Fırtınasının şiddetli yağışları nedeniyle Libyanın doğusunda 10 Eylülde meydana gelen sel felaketinde can kaybı artıyo...	['libya', 'sel', 'haber', 'Dünya']	14.09.2023 06:22:51	sel
Çin’de alarm: Sel vurdu, onlarca timsah çiftlikten kaçtı		KAYNAK BBC Türkçe, (Fotoğraf: Temsili) Çinli yetkililer, selin vurduğu Guangdong eyaletinde çiftlikten kaçan 75 timsahı arıyor. Bölge sakinlerine evlerinden çıkmamaları çağrısı yapıldı Haberin Devamı Haberin Devamı Guangdong eyaletindeki Maoming'de bir gölün suları yükselince 75 civarında timsah serbest kaldı. Timsahların bazıları yakalanırken, belediye görevlileri "güvenlik nedeniyle" bazılarını…	https://image.cnnturk.com/i/cnnturk/75/1200x675/65016238ae0a8f17e4c7daf4.jpg	https://www.cnnturk.com/dunya/cinde-alarm-sel-vurdu-onlarca-timsah-ciftlikten-kacti-2042714	https://www.cnnturk.com/dunya/cinde-alarm-sel-vurdu-onlarca-timsah-ciftlikten-kacti-2042714	https://image.cnnturk.com/i/cnnturk/75/1200x675/65016238ae0a8f17e4c7daf4.jpg	2023-09-13T10:20:00+03:00	Son Dakika Dünya Haberleri - Çinli yetkililer, selin vurduğu Guangdong eyaletinde çiftlikten kaçan 75 timsahı arıyor. Bölge sakinlerine evlerinden çıkmamalar...	['cin', 'sel', 'timsah', 'Dünya']	13.09.2023 07:20:00	sel
Daniel fırtınası barajları patlattı: Libya’da 10 bin kayıp		Yunanistan ve Bulgaristan’ı sele teslim eden Daniel Fırtınası’nın bıraktığı şiddetli yağışlar, Libya’da felakete sebep oldu. 100 bin nüfuslu Derne’de fırtına iki barajı yıktı. Yetkililere göre sadece Derne’de 5 bin 300 kişi hayatını kaybetti, 10 bin kişi ise kayıp. (Hürriyet-Burcu PURTUL UÇAR) Haberin Devamı Haberin Devamı İç savaş yorgunu Libya’yı şimdi de sel vurdu. Yunanistan ve Bulgaristan’da…	https://image.cnnturk.com/i/cnnturk/75/1200x675/65015d84ae0a8f17e4c7daca.jpg	https://www.cnnturk.com/dunya/daniel-firtinasi-barajlari-patlatti-libyada-10-bin-kayip-2042685	https://www.cnnturk.com/dunya/daniel-firtinasi-barajlari-patlatti-libyada-10-bin-kayip-2042685	https://image.cnnturk.com/i/cnnturk/75/1200x675/65015d84ae0a8f17e4c7daca.jpg	2023-09-13T09:15:00+03:00	Dünya Haberleri - Yunanistan ve Bulgaristanı sele teslim eden Daniel Fırtınasının bıraktığı şiddetli yağışlar, Libyada felakete sebep oldu. 100 bin nüfusl...	['libya', 'libya-sel', 'sel', 'Dünya']	13.09.2023 06:15:00	sel
Çin’de sel ve toprak kayması: 7 ölü, 3 kayıp		KAYNAK İHA Çin’in Yulin şehrinde etkili olan şiddetli yağışın yol açtığı sel ve toprak kaymalarında 7 kişi hayatını kaybetti, 3 kişi kayboldu. Guangdong eyaletinde ise selin ardından bir çiftlikteki 75 timsahın sel sularıyla sürüklendiği belirtilirken, çevredekilere evden dışarı çıkmama uyarısı yapıldı. Haberin Devamı Haberin Devamı Çin’i geçtiğimiz hafta vuran Haikui Tayfunu etkisini sürdürüyor.…	https://image.cnnturk.com/i/cnnturk/75/1200x675/6500729cae0a8f1b38689489.jpg	https://www.cnnturk.com/dunya/cinde-sel-ve-toprak-kaymasi-7-olu-3-kayip-2042583	https://www.cnnturk.com/dunya/cinde-sel-ve-toprak-kaymasi-7-olu-3-kayip-2042583	https://image.cnnturk.com/i/cnnturk/75/1200x675/6500729cae0a8f1b38689489.jpg	2023-09-12T17:15:58+03:00	Dünya Haberleri - Çinin Yulin şehrinde etkili olan şiddetli yağışın yol açtığı sel ve toprak kaymalarında 7 kişi hayatını kaybetti, 3 kişi kayboldu. Guangdo...	['cin', 'sel', 'haber', 'Dünya']	12.09.2023 14:15:58	sel
Daniel Fırtınası’nın vurduğu Yunanistan’da can kaybı artıyor		KAYNAK İHA Yunanistan’da Daniel Fırtınası’nın yol açtığı şiddetli yağışların ardından meydana gelen sellerde hayatını kaybedenlerin sayısı 14’e yükseldi. Haberin Devamı Haberin Devamı Daniel Fırtınası’nın vurduğu Yunanistan’da can kaybı arttı. Yetkililer, arama-kurtarma çalışmalarının devam ettiğini belirterek, sellerde hayatını kaybedenlerin sayısının 14’e yükseldiğini belirtti. 4 BİN 250'DEN FA…	https://image.cnnturk.com/i/cnnturk/75/1200x675/64fe0167a4686016ac1ac122.jpg	https://www.cnnturk.com/dunya/daniel-firtinasinin-vurdugu-yunanistanda-can-kaybi-artiyor-2041897	https://www.cnnturk.com/dunya/daniel-firtinasinin-vurdugu-yunanistanda-can-kaybi-artiyor-2041897	https://image.cnnturk.com/i/cnnturk/75/1200x675/64fe0167a4686016ac1ac122.jpg	2023-09-10T20:49:19+03:00	Dünyadan Haberler - Yunanistanda Daniel Fırtınasının yol açtığı şiddetli yağışların ardından meydana gelen sellerde hayatını kaybedenlerin sayısı 14e yüks...	['yunanistan', 'firtina', 'sel', 'Dünya']	10.09.2023 17:49:19	sel
Yunanistan’da sel askeri üssü de vurdu		Orta Yunanistan’ı salı sabahından düne kadar etkisi altına alan Daniel fırtınası, ABD helikopter ve İHA’larının da konuşlandığı Stefanovikio hava üssünü de vurdu. (Yorgo KIRBAKİ-Atina) Haberin Devamı Haberin Devamı Resmi bir açıklama yapılmamakla birlikte, Yunan medyasında, sular altında kalan helikopterlerin, çekici ve vinçlerle üssün daha yüksek bir platformuna taşındıkları belirtildi. Selden z…	https://image.cnnturk.com/i/cnnturk/75/1200x675/64fd5d2fae0a8f1040e948ea.jpg	https://www.cnnturk.com/dunya/yunanistanda-sel-askeri-ussu-de-vurdu-2041719	https://www.cnnturk.com/dunya/yunanistanda-sel-askeri-ussu-de-vurdu-2041719	https://image.cnnturk.com/i/cnnturk/75/1200x675/64fd5d2fae0a8f1040e948ea.jpg	2023-09-10T09:09:06+03:00	Dünyadan Haberler - Orta Yunanistanı salı sabahından düne kadar etkisi altına alan Daniel fırtınası, ABD helikopter ve İHAlarının da konuşlandığı Stefanovi...	['yunanistan-da-sel', 'sel', 'yunanistan', 'askeri-us', 'Dünya']	10.09.2023 06:09:06	sel
Önce yangın, şimdi sel... Yunanistan'da can kayıpları artıyor		KAYNAK İHA Günlerce orman yangını felaketleriyle boğuşan Yunanistan, bu defa da Daniel Fırtınası’nın yol açtığı şiddetli yağışların ardından meydana gelen selle mücadele ediyor. Ülkede şiddetli yağışların neden olduğu selde hayatını kaybedenlerin sayısı 10’a yükseldi. Haberin Devamı Haberin Devamı Yunanistan’da Daniel Fırtınası’nın yol açtığı şiddetli yağışların ardından meydana gelen selde can k…	https://image.cnnturk.com/i/cnnturk/75/1200x675/64fb72afa468640a2067be74.jpg	https://www.cnnturk.com/dunya/once-yangin-simdi-sel-yunanistanda-can-kayiplari-artiyor-2041498	https://www.cnnturk.com/dunya/once-yangin-simdi-sel-yunanistanda-can-kayiplari-artiyor-2041498	https://image.cnnturk.com/i/cnnturk/75/1200x675/64fb72afa468640a2067be74.jpg	2023-09-08T22:19:30+03:00	Dünyadan Haberler - Günlerce orman yangını felaketleriyle boğuşan Yunanistan, bu defa da Daniel Fırtınasının yol açtığı şiddetli yağışların ardından meydana...	['yunanistan', 'sel', 'firtina', 'Dünya']	8.09.2023 19:19:30	sel
Yunanistan'da sel tehlikesi sürüyor: Köprü çöktü, yollarda hasar oluştu...		‘Kanlı Dağ’a huzur geldi! Devrimin ardından zaferin ve huzurun sembolü oldu: İşte Kasiyun'un hikâyesi ve önemi...	https://image.cnnturk.com/i/cnnturk/75/1200x675/64f9c57ba468600e7c7e5929.jpg	https://www.cnnturk.com/dunya/yunanistanda-sel-tehlikesi-suruyor-kopru-coktu-yollarda-hasar-olustu-2041093	https://www.cnnturk.com/dunya/yunanistanda-sel-tehlikesi-suruyor-kopru-coktu-yollarda-hasar-olustu-2041093	https://image.cnnturk.com/i/cnnturk/75/1200x675/64f9c57ba468600e7c7e5929.jpg	2023-09-07T15:44:18+03:00	Dünya Haberleri - Yunanistan'ı etkisi altına alan kötü hava koşulları ve sel tehlikesinin bu akşama kadar devam edeceği bildirildi....	['yunanistan', 'sel', 'haber', 'Dünya']	7.09.2023 12:44:18	sel
Brezilya’daki selde can kaybı 36’ya yükseldi		KAYNAK İHA Brezilya’nın Rio Grande do Sul eyaletinde şiddetli yağışların yol açtığı selde hayatını kaybedenlerin sayısı 36’ya yükseldi. Haberin Devamı Haberin Devamı Brezilya’da meydana gelen sel felaketinde bilanço artıyor. Ülkenin güneyindeki Rio Grande do Sul eyaleti Valisi Eduardo Leite, şiddetli yağışların yol açtığı selde can kaybının 36’ya yükseldiğini açıkladı. Acil kurtarma operasyonları…	https://image.cnnturk.com/i/cnnturk/75/1200x675/64f992e5a468600e7c7e554e.jpg	https://www.cnnturk.com/dunya/brezilyadaki-selde-can-kaybi-36ya-yukseldi-2041008	https://www.cnnturk.com/dunya/brezilyadaki-selde-can-kaybi-36ya-yukseldi-2041008	https://image.cnnturk.com/i/cnnturk/75/1200x675/64f992e5a468600e7c7e554e.jpg	2023-09-07T12:07:54+03:00	Dünyadan Haberler - Brezilyanın Rio Grande do Sul eyaletinde şiddetli yağışların yol açtığı selde hayatını kaybedenlerin sayısı 36ya yükseldi....	['brezilya', 'sel', 'haber', 'Dünya']	7.09.2023 09:07:54	sel
Bulgaristan’daki sel felaketinde can kaybı 4’e ulaştı		KAYNAK İHA Bulgaristan’ın Karadeniz kıyısındaki Burgaz kentinde şiddetli yağışların yol açtığı selde hayatını kaybedenlerin sayısı 4’e yükseldi. Haberin Devamı Haberin Devamı Bulgaristan’ın Karadeniz kıyısındaki bölgelerde şiddetli yağışın ardından meydana gelen sel felaketinin bilançosu artıyor. Kıyı kenti Burgaz'ın polis şefi Emil Pavlov yaptığı açıklamada, sel sularına kapılan 1 kişinin daha c…	https://image.cnnturk.com/i/cnnturk/75/1200x675/64f97d31a468600e7c7e547c.jpg	https://www.cnnturk.com/dunya/bulgaristandaki-sel-felaketinde-can-kaybi-4e-ulasti-2040955	https://www.cnnturk.com/dunya/bulgaristandaki-sel-felaketinde-can-kaybi-4e-ulasti-2040955	https://image.cnnturk.com/i/cnnturk/75/1200x675/64f97d31a468600e7c7e547c.jpg	2023-09-07T10:35:29+03:00	Son Dakika Dünya Haberleri - Bulgaristanın Karadeniz kıyısındaki Burgaz kentinde şiddetli yağışların yol açtığı selde hayatını kaybedenlerin sayısı 4e yüks...	['bulgaristan', 'sel', 'haber', 'Dünya']	7.09.2023 07:35:29	sel
Bakan Yerlikaya duyurdu: Sel mağdurlarına destek ödemeleri başladı		KAYNAK DHA İçişleri Bakanı Ali Yerlikaya, İstanbul'da, sel felaketine ilişkin açıklamalarda bulundu. Yerlikaya, mağdur vatandaşlara destek ödemelerinin başladığını duyurarak, "AFAD ilk etapta 40 milyon TL para gönderdi. Bazı kaymakamlarımız hesaplarına bu konut ve işyeriyle ilgili para aktarmaya başladılar. Muhtemelen bu yarın tamamlanır." ifadelerini kullandı. Haberin Devamı Haberin Devamı İstan…	https://image.cnnturk.com/i/cnnturk/75/1200x675/64f8a99fae0a8f0f00ff9784.jpg	https://www.cnnturk.com/turkiye/bakan-yerlikaya-duyurdu-sel-magdurlarina-destek-odemeleri-basladi-2040814	https://www.cnnturk.com/turkiye/bakan-yerlikaya-duyurdu-sel-magdurlarina-destek-odemeleri-basladi-2040814	https://image.cnnturk.com/i/cnnturk/75/1200x675/64f8a99fae0a8f0f00ff9784.jpg	2023-09-06T18:26:00+03:00	Son Dakika Türkiye Gündem Haberleri - İçişleri Bakanı Ali Yerlikaya, İstanbul'da, sel felaketine ilişkin açıklamalarda bulundu. Yerlikaya, mağdur vatandaşlar...	['ali-yerlikaya', 'sel', 'destek-odemeleri']	6.09.2023 15:26:00	sel
