# Supplementary material for: An automated approach for developing geohazard inventories using news: integrating natural language processing (NLP), machine learning, and mapping
Source: Copernicus journal article supplement (doi:10.5194/nhess-25-2421-2025), 2025-07-21
Supplement: Supplementary file 1 [file nhess-25-2421-2025-supplement.zip]

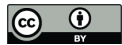

## *Supplement of*

# **An automated approach for developing geohazard inventories using news: integrating natural language processing (NLP), machine learning, and mapping**

**Aydoğın Avcıoğlu et al.**

*Correspondence to:* Aydoğın Avcıoğlu (a.avcioglu@brgm.fr)

- nhess-25-2421-2025-supplement-title-page.pdf
- Figure S1.jpg
- Supplementary.docx
- Table S1.xlsx
- Table S2.xlsx
- Table S3.xlsx

The copyright of individual parts of the supplement might differ from the article licence.
