# Supplementary material for: An automated approach for developing geohazard inventories using news: integrating natural language processing (NLP), machine learning, and mapping
Source: Copernicus journal article supplement (doi:10.5194/nhess-25-2421-2025), 2025-07-21
Supplement: Supplementary file 4 [file Table S2.xlsx]

## Sheet: Sheet1
Hazard	Top Words (Turkish)	Top Words (English)	Frequency (%)
Wildfire	Orman	Forest	3.28
Wildfire	Yangın	Fire	2.59
Wildfire	Yangını	The fire	1.52
Wildfire	Kontrol	Control	1.3
Wildfire	Altına	Underneath	1.15
Wildfire	Müdahale	Intervention	1.12
Wildfire	Yangının	Of the fire	0.88
Wildfire	Yangına	To the fire	0.73
Wildfire	Söndürme	Extinguishing	0.73
Wildfire	Alanda	In the area	0.7
Wildfire	Ormanlık	Forestry	0.68
Wildfire	Çıktı	Occur	0.59
Wildfire	Yangında	In the fire	0.5
Wildfire	İtfaiye	Firefighting	0.45
Total Wildfire			15.22
Flood	Su	Water	1.81
Flood	Yağış	Rainfall	1
Flood	Sel	Flood	0.98
Flood	Sağanak	Downpour	0.88
Flood	Etkili	Effective	0.63
Flood	Yağmur	Rain	0.56
Flood	Altında	Underneath	0.54
Flood	Kaldı	Left	0.48
Flood	Dere	Creek	0.46
Flood	Sular	Waters	0.42
Flood	Mahsur	Stranded	0.42
Flood	İş	Work	0.41
Flood	Ev	House	0.4
Total Flood			8.99
Sinkhole	Obruk	Sinkhole	3.57
Sinkhole	Metre	Meter	2.15
Sinkhole	Obruğun	Of the sinkhole	0.95
Sinkhole	Oluştu	Formed	0.89
Sinkhole	Derinliğinde	At the depth	0.64
Sinkhole	Tarlada	In the field	0.63
Sinkhole	Çapında	With a diameter	0.6
Sinkhole	Var	There is	0.53
Sinkhole	Obruklar	Sinkholes	0.48
Sinkhole	Altı	Bottom	0.45
Sinkhole	Obrukların	Of the sinkholes	0.45
Total Sinkhole			10.34
Landslide	Kaya	Rock	1.62
Landslide	Heyelan	Landslide	1.29
Landslide	Toprak	Soil	0.66
Landslide	Düştü	Fell	0.57
Landslide	Üzerine	On	0.57
Landslide	Bölge	Region	0.43
Landslide	Müdürlük	Directorate	0.42
Landslide	Bağlı	Associated	0.42
Landslide	Havadan	From the air	0.42
Landslide	Helikopter	Helicopter	0.4
Total Landslide			6.8
