# Supplementary material for: An automated approach for developing geohazard inventories using news: integrating natural language processing (NLP), machine learning, and mapping
Source: Copernicus journal article supplement (doi:10.5194/nhess-25-2421-2025), 2025-07-21
Supplement: Supplementary file 5 [file Table S3.xlsx]

## Sheet: Sheet1
id	title	text (Turkish)	text (English)	search_category	nmf_category	Incident	reason
15549	Selde ölenlerin sayısı 53 oldu	Selde ölenlerin sayısı 53 oldu Çin'in kuzeybatısındaki Gansu eyaletinin Mingşien ve Dingşi bölgesindeki sel felaketinde ölenlerin sayısı 53'e ulaştı. Bir haftadır süren yağışlar nedeniyle oluşan sel ve toprak kaymalarında 18 kişi de kayboldu. Bir haftadır devam eden aşırı yağışlar sonucu oluşan sel ve toprak kaymalarında 18 kişinin kayıp olduğu, yaralı 114 kişinin ise bölge hastanelerde tedavi ed…	The number of deaths in the floods in the Mingxien and Dingxi regions of northwestern China's Gansu province has reached 53. 18 people have gone missing in the floods and landslides caused by the heavy rainfall that has been going on for a week. It was reported that 18 people are missing in the floods and landslides that have been caused by the heavy rainfall that has been going on for a week, an…	flood	flood	1	-
13416	Zonguldak'ta sağanak yağmur hayatı felç etti	Akşam saatlerinde kentin yüksek kesimlerinde sağanak yağmur etkili oldu. Yoğun yağmur nedeniyle Elvanpazarcık Beldesi Hayat Mahallesi'nden geçen Kokaksu Deresi taştı. Taşkın nedeniyle Baruthane Caddesi ulaşıma kapattı. Haberin Devamı Elvanpazarcık Belediye Başkanı Hüseyin Uzun, kapanan yola gelerek inceleme yaptı. Hayat Mahallesi Muhtarı Hasan Çakar, yaklaşık 40 hanenin kullandığı yolda Devlet Su…	Heavy rain affected the higher parts of the city in the evening hours. Due to the heavy rain, the Kokaksu Stream passing through the Hayat Neighborhood of Elvanpazarcık Town overflowed. Baruthane Street was closed to traffic due to the flood. More news Elvanpazarcık Mayor Hüseyin Uzun came to inspect the closed road and inspected it. Hayat Neighborhood Headman Hasan Çakar said that the State Hydr…	flood	flood	1	-
6710	İstanbul Boğazı'na çamurlu su aktı	Meteoroloji Genel Müdürlüğü'nün uyarılarının ardından İstanbul'da beklenen yağmur, öğleden sonra Beykoz'da etkili oldu. Şiddetli yağmur nedeniyle Dedeoğlu deresindeki çamurlu su boğaza aktı. İstanbul Boğazı'nın bir kısmının rengi değişti. Boğaza akan çamurlu su havadan da fotoğraflandı. Haberin Devamı Balıkçılık yapan İsmail Gürbüz "Yağmur sonrası çamur dereden geliyor. Denizin rengini değiştiriy…	Following the warnings of the General Directorate of Meteorology, the expected rain in Istanbul became effective in Beykoz in the afternoon. Due to the heavy rain, the muddy water in the Dedeoğlu stream flowed into the Bosphorus. The color of a part of the Bosphorus changed. The muddy water flowing into the Bosphorus was also photographed from the air. More News Fisherman İsmail Gürbüz said, "Aft…	flood	flood	0	common words
10117	Selin ortasında mahsur kaldı! 5 saat sonra kurtardı	Olay, Akliman mevkisinde 11.00 saatlerinde meydana geldi. Edinilen bilgiye göre, köpeklerini boğulmaktan kurtarmaya giden Aslan Karğa isimli vatandaş geçiş yolunun bulunduğu tahta kapıda mahsur kaldı. Haberin Devamı Bir süre sonra çevredeki emniyet ekiplerine seslenen Karğa, olay yerine Sinop Belediyesi itfaiye ekiplerinin gelmesiyle birlikte mahsur kaldığı yerden kurtarıldı. Köpeklerini kurtarma…	The incident occurred at 11:00 in the Akliman area. According to the information received, a citizen named Aslan Karğa, who went to save his dogs from drowning, was trapped at the wooden gate where the passageway was located. Continued News Karğa, who called out to the security teams in the area after a while, was rescued from where he was trapped when the Sinop Municipality fire department teams…	flood	flood	0	common words
14697	Hopa'daki yangın 30 hektara zarar verdi	Hopa'daki yangın 30 hektara zarar verdi Artvin'in Hopa ilçesine bağlı Kemalpaşa beldesinde dün akşam saatlerinde başlayan ve rüzgarın etkisiyle büyüyen yangın, gece kontrol altına alınabildi. Alevlerin 30 hektarlık alana zarar verdiği tahmin ediliyor. Kemalpaşa beldesi Yeşilce mahallesinde başlayan yangın, rüzgarın etkisiyle Kaya köyü mevkisine kadar ilerledi.Yangının bir çay bahçesinde yakılan a…	Hopa fire damaged 30 hectares The fire that started yesterday evening in Kemalpaşa town of Hopa district of Artvin and grew due to the wind was brought under control during the night. It is estimated that the flames damaged an area of ​​30 hectares. The fire that started in Yeşilce neighborhood of Kemalpaşa town spread to Kaya village due to the wind. It was stated that the fire started to grow f…	wildfire	wildfire	1	-
14645	Buras'da orman yangını	Bursa'da orman yangını Bursa'nın Mustafakemalpaşa ilçesinde çıkan orman yangınında, 13 dönüm çamlık alan yandı. Haber devam ediyor Haber devam ediyor Alınan bilgiye göre, öğle saatlerinde, Eski Kızılelma köyü yakınlarında henüz belirlenemeyen nedenle yangın çıktı. Köy muhtarının haber vermesi üzerine Mustafakemalpaşa Belediyesi ve Orman İşletme Müdürlüğü ekipleri, 3 arazöz ve 2 su tankeriyle yang…	Forest fire in Bursa, 13 acres of pine trees were burned in a forest fire that broke out in the Mustafakemalpaşa district of Bursa. The news continues The news continues According to the information received, a fire broke out near Eski Kızılelma village at noon for an unknown reason. Upon notification by the village headman, Mustafakemalpaşa Municipality and Forest Management Directorate teams in…	wildfire	wildfire	1	-
14314	AFAD'dan 6 il için 'orman yangını' uyarısı	AFAD'dan 6 il için 'orman yangını' uyarısı Afet ve Acil Durum Yönetimi Başkanlığı'nca (AFAD) Muğla, İzmir, Manisa, Bursa, Balıkesir ve Çanakkale'de şiddetli rüzgarın etkili olacağı ve orman yangınlarına dikkat edilmesi gerektiği belirtildi.� Haber devam ediyor Haber devam ediyor AFAD'dan yapılan açıklamada, "Muğla, İzmir, Manisa, Bursa, Balıkesir ve Çanakkale illerimizde hafta sonu etkili olacağı…	AFAD issues a ‘forest fire’ warning for 6 provinces The Disaster and Emergency Management Presidency (AFAD) announced that strong winds will be effective in Muğla, İzmir, Manisa, Bursa, Balıkesir and Çanakkale and that attention should be paid to forest fires. News continues News continues In a statement from AFAD, it was said that, "Since the strong winds expected to be effective over the weeken…	wildfire	wildfire	0	Warning alerts
14281	Denizli'de ormanlara giriş kısıtlaması	Denizli'de ormanlara giriş kısıtlaması Denizli Valiliği, mesire alanları, tabiat parkları ve günübirlik kullanım alanlarının dışında kalan ormanlık alanlarda insani faktörlere bağlı olarak yangın riski bulunduğu için piknik yapmak, konaklamak ve ateş yakmak 31 Ekim'e kadar kısıtlandı. Haber devam ediyor Haber devam ediyor Denizli Valiliği'nden yapılan açıklamada, meteorolojiden alınan veriler doğ…		wildfire	wildfire	0	Warning alerts
12467	Saatler sonra ulaşıldı, acı manzara ortaya çıktı	Haberin Devamı Bursa'nın Nilüfer ilçesine bağlı Doğancı Köyü heyelan ve sele teslim oldu. Heyelan sonucu köydeki bir çok ev kullanılamaz hale gelirken araçlar selde sürüklenerek ağır hasar aldı. Köyde bulunan vatandaşlar evlerin üst katlarına sığınıp ilk yardımın gelmesini bekledi. 7 saatlik çalışma sonucu Orhaneli-Bursa istikameti halen kapalıyken ulaşım Orhaneli istikametinden çift şerit olarak…	The Doğancı Village of Bursa's Nilüfer district was surrendered to landslides and floods. As a result of the landslide, many houses in the village became unusable, while vehicles were swept away in the flood and were severely damaged. The citizens in the village took shelter on the upper floors of the houses and waited for first aid to arrive. As a result of the 7-hour work, the Orhaneli-Bursa di…	flood	landslide	1	-
7775	Otomobil toprak ve kaya parçaları altında kaldı	Sincik ilçesinde yaklaşık bir haftadır etkili olan kar yağışın yerini sağanak yağışa bırakması ile Sincik-Yarpuzlu köyü yolunda heyelan meydana geldi. Haberin Devamı Heyelan anı vatandaşlar tarafından cep telefonları ile görüntülenirken, Hacı K’ye ait park halindeki bir otomobil ise kayan toprak ve kaya parçalarının altında kaldı. Ölen ya da yaralananın olmadığı olayda karayolu trafiğe kapanırken…	In Sincik district, after the heavy snowfall that had been effective for about a week gave way to heavy rain, a landslide occurred on the Sincik-Yarpuzlu village road. The rest of the news While the landslide was recorded by citizens with their mobile phones, a parked car belonging to Hacı K. remained under the sliding soil and rock pieces. No one was killed or injured in the incident, while the …	landslide	landslide	1	-
8497	Uzungöl'de yaban hayatı kaynaklı kaya tehdidine çelik bariyerli önlem	Kentte doğal güzellikleriyle ünlü turizm merkezi Uzungöl'de, heyelanın yanı sıra yaban hayvanlarının yamaç araziden olası kaya ve taş düşürmelerine karşı, Çaykara Belediyesi harekete geçti. Hazırlanan proje kapsamında yüzde 70 eğimli 7 dönüm alanda AFAD koordinesinde ıslah çalışması başlatıldı. Endüstriyel dağcı ekiplerince, Gölbaşı ve Yenimahalle mevkilerindeki oteller, turizm tesisleri ve evler…	In Uzungöl, a tourism center famous for its natural beauties in the city, Çaykara Municipality took action against landslides and possible rocks and stones falling from the slopes by wild animals. Within the scope of the prepared project, reclamation work was started in a 7-acre area with a 70 percent slope under the coordination of AFAD. The installation of high-energy absorbing steel barriers h…	landslide	landslide	0	common words
7970	Son dakika: Kaya tırmanışı yapan Leyla Kara'dan acı haber!	İzmir'in Buca İlçesi'nde, kaya tırmanışı yaptığı sırada dengesini yitirerek düşen 33 yaşındaki Leyla Kara, öldü. Haberin Devamı Olay, dün akşam Kaynaklar Mahallesi'ndeki kaya tırmanışı alanında meydana geldi. Arkadaşları ile kaya tırmanışı yapmak için tırmanış bölgesine giden gelen Leyla Kara, tırmanış yaptığı sırada iddiaya göre fotoğraf çekmek isterken dengesini kaybederek yaklaşık 10 metre yük…	In the Buca district of Izmir, 33-year-old Leyla Kara, who lost her balance and fell while rock climbing, has died. The rest of the news The incident occurred last night in the rock climbing area in the Kaynaklar neighborhood. Leyla Kara, who went to the climbing area with her friends to do rock climbing, allegedly lost her balance while trying to take a photo and fell from a height of approximat…	landslide	landslide	0	common words
13686	Hafik’te devasa obruk	Bölge sakini Fatih Rüştü Soğancıoğlu’nun hayvanlarını otlattığı sırada büyük bir gürültüyle çökmeyle oluşan obruğun 10 metre çapında, 15 metre derinlikte olduğu belirtildi. Soğancıoğlu’nun düşmekten son anda kurtulduğu obruk çervesinde güvenlik önlemi alındı. Yeraltı sularının çekilmesiyle oluştuğu tahmin edilen obruğun toprakla kapatılması için Hafik İlçe Özel İdaresi tarafından çalışma başlatıl…	It was reported that the sinkhole, which was formed when a local resident, Fatih Rüştü Soğancıoğlu, was grazing his animals, collapsed with a loud noise and was 10 meters in diameter and 15 meters deep. Security measures were taken around the sinkhole where Soğancıoğlu narrowly escaped falling. Work has been initiated by the Hafik District Special Administration to cover the sinkhole, which is th…	sinkhole	sinkhole	1	-
13735	Denizli’de ay çekirdeği tarlasında obruk oluştu!	Çivril ilçesine bağlı Yakacık Mahallesi yakınlarındaki Elmalı mevkisinde bulunan Süleyman Çetin'e ait ay çekirdeği tarlasında obruk oluştu. Obruk, ay çekirdeği hasadı yapılırken fark edildi. İhbar üzerine tarlaya gelen jandarma ekipleri, 20 metre çapında 5 metre derinliğindeki obruğun çevresine güvenlik şeridi çekti. Bölgede yaşayanlar, görmeye geldikleri obruğu cep telefonlarıyla görüntülüyor. H…	A sinkhole formed in the sunflower seed field belonging to Süleyman Çetin in the Elmalı area near Yakacık Neighborhood in Çivril district. The sinkhole was noticed while harvesting sunflower seeds. Upon receiving a report, gendarmerie teams came to the field and set up a security cordon around the sinkhole, which is 20 meters in diameter and 5 meters deep. Residents of the area are recording the …	sinkhole	sinkhole	1	-
8228	'Göktaşı düştü' diye jandarmaya koştular	KARS’ın Kağızman ilçesinin Akçay Köyünde ’Göktaşı düştü’ denilen bölgede araştırma yapan jandarma, obruk olduğunu tespit etti. Köy halkı ise, obrukun çok eski olduğunu sık sık otlayan koyunların buraya düştüğünü bildirdi. Haberin Devamı Kağızman’a 10 kilometre uzaklıktaki Akçay köyüne 5 kilometre uzaklıktaki arazide bazı vatandaşlar "Göktaşı düştü" diyerek jandarmaya başvurdu. Bölgede araştırma b…	The gendarmerie, who conducted research in the area called “Meteorite fell” in the Akçay Village of the Kağızman district of KARS, detected a sinkhole. The villagers reported that the sinkhole was very old and that sheep that grazed frequently fell there. Continued reading The gendarmerie, who started research in the area 5 kilometers from the Akçay village, which is 10 kilometers from Kağızman, …	landslide	sinkhole	0	misinterpretation
13705	Sayıları giderek artıyor! Bölge halkı tedirgin	Haberin Devamı Emirdağ'a bağlı, özellikle tarım arazilerinin bulunduğu Yeniköy, Sığırcık ve Kaldırım köylerinde son dönemde obruklar oluşmaya başladı. İlk olarak 2019 yılında ortaya çıkan obruklar nedeniyle tarım arazilerinin zarar gördüğünü söyleyen bölge halkı, bölgede irili ufaklı obruk sayısının 10'u bulduğunu aktardı. Son olarak Yeniköy'de 30 metre derinliğinde ve 20 metre çapında oluşan obr…	More News Sinkholes have recently begun to form in the Yeniköy, Sığırcık and Kaldırım villages of Emirdağ, which are particularly home to agricultural lands. Stating that agricultural lands were damaged due to the sinkholes that first appeared in 2019, the locals reported that the number of sinkholes of all sizes in the region has reached 10. The latest sinkhole in Yeniköy, which was 30 meters de…	sinkhole	sinkhole	0	review news
